# Supplementary material for: Transcriptomes of six mutants in the Sen1 pathway reveal combinatorial control of transcription termination across the Saccharomyces cerevisiae genome
Source: PLoS Genet. 2017 Jun 30;13(6):e1006863. doi: 10.1371/journal.pgen.1006863 (PMC5513554; doi:10.1371/journal.pgen.1006863)
Supplement: S4 Table — The log2-transformed (left) or untransformed (right) fold change in average transcript level over all annotated ORFs in each mutant strain relative to wild-type is shown, ranked by decreasing effect of the sen1 mutant. (XLSX) [file pgen.1006863.s012.xlsx]

## Sheet: Sheet1
Systematic Name	Standard Name	log2 change	diff_sen1	diff_nrd1	diff_nab3	diff_ssu72	diff_rpb11	diff_hrp1	Fold change	diff_sen1	diff_nrd1	diff_nab3	diff_ssu72	diff_rpb11	diff_hrp1
YCL018W	LEU2		NaN	NaN	NaN	NaN	NaN	NaN		N/A	N/A	N/A	N/A	N/A	N/A
YCL066W			NaN	NaN	NaN	NaN	NaN	NaN		N/A	N/A	N/A	N/A	N/A	N/A
YCL067C			NaN	NaN	NaN	NaN	NaN	NaN		N/A	N/A	N/A	N/A	N/A	N/A
YCR039C			NaN	NaN	NaN	NaN	NaN	NaN		N/A	N/A	N/A	N/A	N/A	N/A
YCR040W			NaN	NaN	NaN	NaN	NaN	NaN		N/A	N/A	N/A	N/A	N/A	N/A
YCR096C			NaN	NaN	NaN	NaN	NaN	NaN		N/A	N/A	N/A	N/A	N/A	N/A
YDL007C-A			NaN	NaN	-0.10095	0.40721	0.21893	0.04579		N/A	N/A	0.932419	1.32612	1.16387	1.03225
YDR039C	ENA2		NaN	NaN	NaN	NaN	NaN	NaN		N/A	N/A	N/A	N/A	N/A	N/A
YDR194W-A			NaN	NaN	0.81969	0.14491	0.90422	NaN		N/A	N/A	1.76503	1.10566	1.87153	N/A
YFR057W			NaN	0.22769	NaN	-0.18335	0.51133	-0.31782		N/A	1.17096	N/A	0.880656	1.42536	0.802281
YHR053C	CUP1-1		NaN	NaN	NaN	NaN	NaN	NaN		N/A	N/A	N/A	N/A	N/A	N/A
YHR055C	CUP1-2		NaN	NaN	NaN	NaN	NaN	NaN		N/A	N/A	N/A	N/A	N/A	N/A
YLR154C-G			NaN	NaN	NaN	NaN	NaN	NaN		N/A	N/A	N/A	N/A	N/A	N/A
YLR154C-H			NaN	NaN	NaN	NaN	NaN	NaN		N/A	N/A	N/A	N/A	N/A	N/A
YLR155C	ASP3-1		NaN	NaN	NaN	NaN	NaN	NaN		N/A	N/A	N/A	N/A	N/A	N/A
YLR156C-A			NaN	NaN	NaN	NaN	NaN	NaN		N/A	N/A	N/A	N/A	N/A	N/A
YLR156W			NaN	NaN	NaN	NaN	NaN	NaN		N/A	N/A	N/A	N/A	N/A	N/A
YLR157C	ASP3-2		NaN	NaN	NaN	NaN	NaN	NaN		N/A	N/A	N/A	N/A	N/A	N/A
YLR157C-C			NaN	NaN	NaN	NaN	NaN	NaN		N/A	N/A	N/A	N/A	N/A	N/A
YLR157W-D			NaN	NaN	-0.14657	NaN	1.3669	NaN		N/A	N/A	0.903396	N/A	2.57916	N/A
YLR157W-E			NaN	-2.3771	-0.12441	NaN	NaN	-2.3771		N/A	0.192496	0.917379	N/A	N/A	0.192496
YLR158C	ASP3-3		NaN	NaN	NaN	NaN	NaN	NaN		N/A	N/A	N/A	N/A	N/A	N/A
YLR159C-A			NaN	NaN	NaN	NaN	NaN	NaN		N/A	N/A	N/A	N/A	N/A	N/A
YLR159W			NaN	NaN	NaN	NaN	NaN	NaN		N/A	N/A	N/A	N/A	N/A	N/A
YLR160C	ASP3-4		NaN	NaN	NaN	NaN	NaN	NaN		N/A	N/A	N/A	N/A	N/A	N/A
YLR161W			NaN	NaN	NaN	NaN	NaN	NaN		N/A	N/A	N/A	N/A	N/A	N/A
YOR202W	HIS3		NaN	NaN	NaN	NaN	NaN	NaN		N/A	N/A	N/A	N/A	N/A	N/A
YDR042C			7.1027	3.8579	5.3854	5.4216	5.32	-0.36071		137.444	14.4992	41.7991	42.8612	39.9466	0.778781
YHR156C	LIN1		4.9443	1.2574	3.6938	3.9042	2.1377	-0.45879		30.7881	2.39065	12.9403	14.9721	4.4006	0.727596
YHR157W	REC104		4.5222	0.76455	2.3101	3.509	2.592	-0.18607		22.9783	1.69884	4.95917	11.3845	6.02934	0.878997
YNL024C			4.5042	2.1174	3.4788	1.5931	0.85726	-1.1796		22.6934	4.33911	11.1487	3.01697	1.81159	0.441474
YJR129C	EFM3		4.3728	1.313	4.3731	1.1647	0.78697	-1.0762		20.7178	2.48458	20.7221	2.24187	1.72545	0.474276
YGR236C	SPG1		4.3605	0.69768	2.4589	0.27721	0.20437	-0.19803		20.5419	1.62189	5.49797	1.21185	1.15218	0.87174
YBR298C-A			4.2336	1.2646	0.88884	0.098607	1.0933	-0.038004		18.8122	2.40261	1.85169	1.07074	2.13362	0.974002
YGL183C	MND1		4.1148	1.0384	1.9941	0.52513	0.34078	-0.21052		17.3252	2.05395	3.98368	1.43906	1.26644	0.864226
YGL098W	USE1		4.0397	2.1177	0.81573	3.0892	3.539	1.8567		16.4464	4.34001	1.76019	8.51024	11.6237	3.62178
YDR472W	TRS31		3.9996	2.3996	1.4871	2.9891	0.60316	-1.305		15.9956	5.27657	2.80325	7.93979	1.51904	0.404721
YMR107W	SPG4		3.9812	2.411	0.50509	1.8885	2.4198	0.30383		15.7929	5.31843	1.41921	3.7025	5.35097	1.23442
YPL201C	YIG1		3.9786	3.1442	3.2493	0.43694	0.82836	0.66565		15.7644	8.84094	9.50904	1.35373	1.77567	1.58628
YJL153C	INO1		3.9775	1.1732	2.3789	2.3056	2.1127	0.56091		15.7524	2.25511	5.2014	4.94373	4.325	1.4752
YBR076W	ECM8		3.8208	1.5786	2.3324	2.8293	1.9107	0.22282		14.1311	2.9868	5.03642	7.10729	3.75991	1.16701
YOR278W	HEM4		3.8194	0.68053	1.0525	3.811	1.1655	-0.92443		14.1174	1.60273	2.07412	14.0354	2.24311	0.526889
YCR015C	CTO1		3.7619	1.6896	0.77601	4.4222	3.6457	0.17184		13.5658	3.22567	1.71239	21.4395	12.516	1.12649
YKR034W	DAL80		3.704	0.43079	0.73903	1.3862	0.43841	0.4107		13.0321	1.34797	1.66905	2.61389	1.35511	1.32933
YJL105W	SET4		3.701	0.77917	1.0231	0.5366	0.85487	-1.1743		13.005	1.71614	2.03228	1.45055	1.8086	0.443099
YOL034W	SMC5		3.683	0.41514	-0.076016	2.3666	-0.081794	-0.98345		12.8438	1.33343	0.948674	5.15724	0.944882	0.505769
YLL046C	RNP1		3.6209	0.36044	2.9113	1.7505	1.1231	0.18094		12.3027	1.28382	7.52296	3.36475	2.17815	1.13362
YOR186W			3.5926	1.4734	1.1916	1.3224	1.5461	0.10009		12.0637	2.77676	2.28406	2.50082	2.92027	1.07184
YNR073C			3.5887	0.97392	0.83934	0.96427	-0.28146	-0.51888		12.0311	1.96417	1.78923	1.95108	0.822758	0.697913
YNR034W-A			3.5691	1.1342	1.3254	2.7006	1.4641	0.95665		11.8688	2.19497	2.50602	6.50072	2.75891	1.9408
YLR054C	OSW2		3.5501	1.527	2.0516	0.46772	0.2998	0.67046		11.7135	2.88186	4.14565	1.38292	1.23097	1.59158
YNL024C-A	KSH1		3.5276	1.3455	2.0574	0.81847	1.1271	-2.2633		11.5322	2.54118	4.16235	1.76353	2.18419	0.208295
YLR105C	SEN2		3.4884	0.18488	0.82442	1.083	0.62291	-0.56328		11.2231	1.13672	1.77082	2.11844	1.53998	0.676762
YKL037W	AIM26		3.4739	0.25195	0.19545	4.0592	0.74017	0.89501		11.1109	1.19082	1.14508	16.6702	1.67037	1.85962
YIR032C	DAL3		3.4507	2.1614	1.418	0.74451	0.53587	-0.54931		10.9336	4.47349	2.67215	1.67541	1.44982	0.683347
YOL114C			3.4443	1.4899	1.4056	1.035	0.15034	0.062412		10.8852	2.8087	2.64928	2.04911	1.10983	1.04421
YOR040W	GLO4		3.4341	0.15929	1.3729	1.424	0.82785	-0.76354		10.8085	1.11674	2.58991	2.68328	1.77504	0.589049
YEL070W	DSF1		3.4239	0.68276	0.52982	1.6717	0.099001	-0.27277		10.7324	1.60521	1.44375	3.1859	1.07103	0.827729
YDL183C			3.4025	1.5504	1.4062	1.5036	-0.28716	0.031512		10.5744	2.92898	2.65038	2.83549	0.819514	1.02208
YJR005C-A	LSO1		3.4012	0.64352	0.96225	1.5243	0.11855	-0.64968		10.5648	1.56214	1.94835	2.87647	1.08564	0.637422
YPL223C	GRE1		3.3919	1.388	4.0577	1.1824	0.88121	-0.32858		10.497	2.61716	16.6529	2.26954	1.84192	0.79632
YOR268C			3.3863	2.2741	2.0821	0.46657	0.36692	-1.489		10.4563	4.83696	4.23423	1.38182	1.2896	0.356259
YDR342C	HXT7		3.3795	0.1471	0.57749	-0.07381	0.80775	0.5789		10.4071	1.10734	1.49225	0.950126	1.75048	1.49371
YML058W-A	HUG1		3.3781	0.77701	0.52872	0.64607	1.0083	-0.9609		10.397	1.71358	1.44265	1.5649	2.01154	0.513736
YPR145C-A			3.3479	1.1397	0.4009	2.6489	2.0272	0.59906		10.1817	2.20335	1.32033	6.27189	4.07613	1.51473
YNL117W	MLS1		3.3243	1.4996	1.8405	0.52078	0.69063	-0.032134		10.0165	2.82764	3.58134	1.43473	1.61399	0.977973
YBR182C-A			3.3007	1.4167	2.4872	2.4829	1.7522	0.23795		9.85394	2.66974	5.60689	5.5902	3.36872	1.17932
YMR175W	SIP18		3.298	1.1044	0.21725	0.7587	1.512	0.098071		9.83551	2.15009	1.16252	1.69197	2.85205	1.07034
YPL054W	LEE1		3.2885	0.98199	1.6235	1.0166	0.46207	0.41535		9.77096	1.97519	3.08122	2.02315	1.37752	1.33362
YOR237W	HES1		3.2562	0.36976	1.2086	1.3527	1.3449	-0.096814		9.55463	1.29214	2.31113	2.5539	2.54013	0.935096
YJL052C-A			3.2557	1.0598	0.88043	0.9396	-0.16132	NaN		9.55132	2.08464	1.84092	1.918	0.894207	N/A
YPL171C	OYE3		3.2413	0.53497	1.1971	2.1924	-0.058896	-0.15989		9.45646	1.44891	2.29278	4.57065	0.959998	0.895093
YPR091C	NVJ2		3.234	-0.13512	0.17552	1.8726	0.40618	-0.87991		9.40873	0.910594	1.12937	3.66192	1.32517	0.543401
YNL093W	YPT53		3.2222	1.7291	1.8563	0.4571	0.29354	0.021507		9.33209	3.31521	3.62078	1.37278	1.22564	1.01502
YMR194C-B	CMC4		3.2057	0.5628	1.7111	1.1961	1.5684	-1.0893		9.22597	1.47713	3.2741	2.29119	2.96576	0.469989
YOL131W			3.1809	0.90558	0.76205	0.3387	0.58682	-0.23156		9.06873	1.8733	1.6959	1.26462	1.50193	0.851713
YFL012W			3.1691	0.19848	-0.27123	0.75357	1.9196	-0.34993		8.99485	1.14749	0.828613	1.68596	3.78318	0.784622
YDR106W	ARP10		3.1685	1.9496	1.3259	0.81432	0.3732	-0.503		8.99111	3.86267	2.50689	1.75847	1.29522	0.705638
YMR017W	SPO20		3.111	0.76669	1.3081	1.2165	0.63891	0.094399		8.63981	1.70136	2.47615	2.32382	1.55715	1.06762
YMR206W			3.0762	0.6661	0.85791	1.4849	-0.056435	0.32298		8.4339	1.58678	1.81241	2.79898	0.961637	1.25091
YJL047C-A			3.0661	1.0909	1.5609	1.2689	2.9298	-1.577		8.37506	2.13007	2.95038	2.40978	7.62005	0.335178
YPL200W	CSM4		3.0545	2.4911	3.0479	0.43712	-0.22468	0.40285		8.30799	5.62206	8.27007	1.3539	0.855785	1.32212
YGL249W	ZIP2		3.0428	1.1325	1.5859	0.9508	0.77398	-0.77273		8.24089	2.19238	3.00195	1.93294	1.70998	0.585309
YOR293C-A			3.0398	0.15872	-0.17901	0.29596	0.82136	0.21164		8.22377	1.1163	0.883309	1.2277	1.76707	1.158
YHR096C	HXT5		3.02	2.3981	1.9604	0.99978	0.94204	0.28188		8.11168	5.27109	3.8917	1.9997	1.92124	1.21578
YGL146C	RRT6		2.9992	1.3304	3.1329	0.87695	1.0567	-0.95977		7.99557	2.51472	8.77196	1.83649	2.08017	0.514139
YKL096C-B			2.9723	-0.32026	1.6064	1.4576	0.15714	-0.63601		7.84786	0.800926	3.04491	2.74651	1.11507	0.64349
YPL186C	UIP4		2.9568	0.49541	0.7242	0.93653	0.65649	0.25576		7.764	1.40972	1.65198	1.91392	1.57624	1.19396
YNL042W-B			2.9285	-0.8237	-0.0047074	-0.43829	0.15536	1.5153		7.61318	0.564991	0.996742	0.738009	1.1137	2.85858
YGR144W	THI4		2.8692	0.36259	0.31267	2.862	1.1416	0.042772		7.3066	1.28573	1.242	7.27022	2.20626	1.03009
YCL008C	STP22		2.8608	-0.47979	0.15679	-0.25023	0.4821	-1.1777		7.26418	0.717082	1.1148	0.840762	1.39678	0.442056
YHR086W-A			2.8541	0.62107	2.0796	0.99833	0.14215	-0.02841		7.23052	1.53802	4.2269	1.99769	1.10355	0.9805
YJL048C	UBX6		2.8439	-1.2687	-0.68159	0.0030958	-0.047839	-0.49085		7.17958	0.415034	0.623478	1.00215	0.967384	0.711606
YBR148W	YSW1		2.8431	0.07452	0.2522	0.35064	-0.22634	0.51669		7.1756	1.05301	1.19102	1.27513	0.854801	1.43067
YLR307C-A			2.8301	0.75938	-0.39012	0.50702	1.5549	-0.18638		7.11123	1.69276	0.763066	1.42111	2.93813	0.878808
YJR095W	SFC1		2.8289	0.80762	0.72904	0.3034	0.71526	0.43639		7.10532	1.75032	1.65754	1.23405	1.64178	1.35321
YBR050C	REG2		2.8129	1.5173	1.8118	0.69013	0.55907	-0.67045		7.02696	2.86255	3.5108	1.61343	1.47332	0.628311
YDR402C	DIT2		2.8108	0.44368	0.37875	1.0406	0.70674	-0.099977		7.01674	1.36007	1.30021	2.05708	1.63211	0.933048
YHR214C-D			2.8075	1.1218	1.3605	1.1054	1.4012	0.65627		7.0007	2.17618	2.56774	2.15159	2.64121	1.576
YDR169C-A			2.8025	1.4802	1.9368	0.20465	0.38537	-0.49135		6.97648	2.78987	3.82856	1.15241	1.30619	0.711359
YNL196C	SLZ1		2.7965	1.0937	1.1235	1.3917	1.0193	-1.0295		6.94753	2.13421	2.17875	2.62388	2.02694	0.48988
YCR014C	POL4		2.7692	1.1251	1.0325	3.218	2.8604	0.55125		6.8173	2.18117	2.04557	9.30496	7.26217	1.46535
YKL221W	MCH2		2.7668	0.58629	0.45078	1.2244	0.43266	0.34761		6.80597	1.50138	1.36678	2.33658	1.34972	1.27245
YMR244W			2.766	-0.41005	0.34164	0.77557	0.63149	-1.0198		6.80219	0.752597	1.2672	1.71187	1.54916	0.493185
YOL117W	RRI2		2.7656	0.38233	0.43408	1.5823	0.4002	0.4288		6.80031	1.30345	1.35105	2.99447	1.31969	1.34611
YLR412C-A			2.7648	0.68621	1.0113	0.47029	0.96057	NaN		6.79654	1.60905	2.01573	1.38539	1.94608	N/A
YBR250W	SPO23		2.7504	0.40246	0.67093	0.78599	0.397	-0.48456		6.72904	1.32176	1.5921	1.72428	1.31677	0.714715
YAL064W			2.7428	0.42087	0.32028	0.89566	2.0032	0.33845		6.69368	1.33873	1.24857	1.86046	4.00888	1.2644
YER078W-A			2.7287	2.1736	1.6003	2.6202	0.06987	NaN		6.62858	4.51148	3.03206	6.14835	1.04962	N/A
YDL024C	DIA3		2.7217	0.26581	0.075898	0.33023	0.31634	-0.54058		6.5965	1.20231	1.05402	1.25721	1.24517	0.687494
YFL052W	ZNF1		2.7217	1.5768	0.79627	0.20426	0.9204	0.084008		6.5965	2.98307	1.73661	1.1521	1.89264	1.05996
YCL005W-A	VMA9		2.7039	0.0095223	0.4471	0.81707	0.026596	-1.5589		6.51561	1.00662	1.3633	1.76182	1.01861	0.33941
YEL035C	UTR5		2.7033	0.20864	0.74202	1.8493	1.3296	-0.52945		6.5129	1.1556	1.67252	3.60325	2.51333	0.692819
YJR150C	DAN1		2.6731	1.1799	-0.23614	0.68722	0.63714	0.27249		6.37798	2.26561	0.849014	1.61018	1.55524	1.20789
YJL160C			2.6687	0.89948	0.92239	0.54268	0.26768	-0.28319		6.35856	1.86539	1.89525	1.45668	1.20387	0.821772
YGR292W	MAL12		2.6681	1.7922	1.5974	0.3197	1.2932	-0.52822		6.35592	3.46343	3.02597	1.24807	2.45071	0.69341
YDR034W-B			2.6446	0.99384	1.7712	2.527	2.2913	0.42054		6.25322	1.99148	3.41338	5.76372	4.89497	1.33843
YKR061W	KTR2		2.6414	0.2395	1.4186	1.4934	0.51442	-0.26124		6.23937	1.18058	2.67326	2.81552	1.42842	0.83437
YPR078C			2.6201	1.0912	2.4208	1.4223	1.5797	-0.62375		6.14793	2.13051	5.35468	2.68012	2.98908	0.648982
YMR251W	GTO3		2.6189	0.62209	2.0028	-0.076237	1.0715	-0.66317		6.14282	1.5391	4.00777	0.948528	2.10162	0.631489
YBR284W			2.602	1.5972	1.5307	1.7809	0.2967	-0.36759		6.07128	3.02556	2.88926	3.4364	1.22833	0.775076
YBR117C	TKL2		2.5997	1.1022	1.1462	1.3826	0.80854	-0.70098		6.06161	2.14682	2.2133	2.60738	1.75144	0.615154
YOR032W-A			2.5988	0.2775	0.3359	2.5918	1.7358	-0.34556		6.05783	1.21209	1.26216	6.0285	3.33064	0.787002
YDR078C	SHU2		2.5983	0.57509	-0.33102	1.7587	0.7038	-0.86311		6.05573	1.48977	0.794974	3.38393	1.62879	0.549766
YMR040W	YET2		2.5958	0.56335	0.51704	1.332	1.2919	-0.50587		6.04524	1.4777	1.43102	2.51751	2.4485	0.704236
YNL130C-A	DGR1		2.59	1.48	0.26302	1.33	1.1269	-0.15766		6.02099	2.78949	1.19999	2.51403	2.18389	0.896478
YKL006C-A	SFT1		2.5851	1.2335	0.73537	2.188	1.6555	-1.28		6.00057	2.35137	1.66482	4.55673	3.15032	0.411796
YOR134W	BAG7		2.579	0.92627	1.7236	0.54317	1.5742	0.19502		5.97525	1.90036	3.30259	1.45717	2.9777	1.14474
YBL071C-B			2.5766	0.06895	-0.32387	0.055104	0.34966	-0.38702		5.96532	1.04895	0.798924	1.03893	1.27426	0.764708
YGR121W-A			2.5721	0.94126	2.0243	0.39015	0.93378	-1.096		5.94674	1.9202	4.06794	1.31053	1.91027	0.467812
YBR299W	MAL32		2.5654	1.695	1.6278	0.3952	1.3487	-0.66586		5.91919	3.23777	3.09041	1.31513	2.54683	0.630313
YGR273C			2.5468	0.75173	1.2543	0.28777	0.45805	-0.38347		5.84337	1.68381	2.38551	1.22075	1.37368	0.766592
YDR383C	NKP1		2.5419	1.5517	2.5512	0.19814	0.26635	-1.1618		5.82355	2.93162	5.86122	1.14722	1.20276	0.446955
YIL134W	FLX1		2.5399	0.59637	2.2231	2.6423	1.2597	0.70578		5.81549	1.51191	4.66896	6.24326	2.39446	1.63103
YBR285W			2.5281	0.14022	0.73007	0.85649	1.0975	0.013195		5.76812	1.10207	1.65872	1.81063	2.13984	1.00919
YOR394C-A			2.5156	0.79687	-0.14456	0.6832	-0.099313	-1.1494		5.71835	1.73733	0.904655	1.6057	0.933477	0.450813
YDR018C			2.512	1.676	0.93878	0.86392	1.1157	-0.22566		5.7041	3.19541	1.91691	1.81998	2.167	0.855204
YML037C			2.5073	0.31711	1.8845	0.047397	0.19056	-0.65407		5.68555	1.24583	3.69225	1.0334	1.14121	0.635485
YKL151C			2.5063	1.4251	2.8505	0.35717	0.60173	-0.1949		5.68161	2.68533	7.2125	1.28091	1.51754	0.873633
YGL087C	MMS2		2.4917	-0.18147	0.090166	0.078364	-0.28959	-0.73566		5.6244	0.881804	1.06449	1.05582	0.818135	0.600543
YBR182C	SMP1		2.4905	0.41277	0.90774	2.3202	2.0177	-0.2155		5.61973	1.33124	1.8761	4.99401	4.04938	0.861248
YHL012W			2.4902	-0.075073	-0.38446	1.9385	1.7515	-0.52823		5.61856	0.949294	0.766066	3.83307	3.36708	0.693405
YKL026C	GPX1		2.4872	0.65668	0.73342	0.81287	0.35892	-0.33205		5.60689	1.57645	1.66258	1.7567	1.28247	0.794407
YOR351C	MEK1		2.4825	1.2406	1.1699	0.74521	0.73796	-0.27993		5.58865	2.36297	2.24996	1.67622	1.66782	0.823631
YPL121C	MEI5		2.4819	0.015925	1.3718	0.10444	-0.30984	-0.68142		5.58633	1.0111	2.58793	1.07508	0.806731	0.623551
YDR070C	FMP16		2.4711	1.9149	2.029	1.6743	1.2786	0.97914		5.54466	3.77088	4.08122	3.19164	2.42603	1.97129
YMR052W	FAR3		2.4692	0.35246	0.037299	0.56764	-0.36734	-0.42042		5.53737	1.27674	1.02619	1.4821	0.77521	0.747207
YGR059W	SPR3		2.4482	1.7995	3.5079	0.65817	0.38572	-0.16997		5.45735	3.481	11.3758	1.57808	1.30651	0.888861
YNL204C	SPS18		2.4425	1.4198	2.1068	0.6394	0.81733	0.72358		5.43583	2.67548	4.30735	1.55768	1.76214	1.65127
YNR071C			2.438	1.5815	1.0305	0.69905	0.063652	-0.75146		5.4189	2.99281	2.04273	1.62344	1.04511	0.594002
YGL086W	MAD1		2.4311	0.19077	-0.16666	0.3263	-0.25374	-1.015		5.39304	1.14137	0.890903	1.25379	0.838719	0.494828
YKR039W	GAP1		2.4261	0.6064	0.20465	1.0373	0.69375	-0.47445		5.37439	1.52246	1.15241	2.05238	1.61748	0.719741
YHL016C	DUR3		2.4246	0.86079	0.78642	1.6782	1.5266	0.067294		5.3688	1.81603	1.72479	3.20028	2.88106	1.04775
YMR132C	JLP2		2.4225	0.89131	2.8175	0.37903	0.76843	-0.75423		5.36099	1.85486	7.0494	1.30047	1.70342	0.592863
YLR136C	TIS11		2.4192	1.5862	2.0817	1.4324	1.9475	-1.2556		5.34874	3.00257	4.23306	2.69895	3.85706	0.418819
YLR329W	REC102		2.4102	0.87237	2.8767	0.68445	0.95619	0.39395		5.31548	1.83067	7.34468	1.60709	1.94018	1.31399
YIR013C	GAT4		2.4022	1.6596	2.9179	-0.13302	0.46585	-0.78126		5.28609	3.15929	7.55745	0.911921	1.38113	0.581858
YOR008C-A			2.3928	0.90311	0.70026	0.78113	0.51168	-1.2085		5.25176	1.87009	1.6248	1.71848	1.42571	0.432718
YOR275C	RIM20		2.3865	0.1487	-0.043757	0.61583	0.067549	-0.35694		5.22887	1.10857	0.970125	1.53244	1.04793	0.780819
YCL048W	SPS22		2.3814	0.46509	0.10881	0.3372	0.59144	0.65137		5.21042	1.3804	1.07834	1.2633	1.50675	1.57066
YEL057C			2.3737	1.3094	1.0285	1.3202	1.1602	1.6799		5.18269	2.47838	2.0399	2.49701	2.23488	3.20406
YGL045W	RIM8		2.3669	0.33847	0.61372	2.3106	0.66254	-0.61318		5.15832	1.26441	1.5302	4.96089	1.58287	0.653754
YER081W	SER3		2.3587	2.0673	1.8784	2.2059	0.96082	-1.0444		5.12908	4.19102	3.67667	4.61362	1.94642	0.484847
YOR298W	MUM3		2.3521	0.52364	0.37754	1.141	0.55533	1.8994		5.10567	1.43758	1.29912	2.20534	1.4695	3.73058
YDR259C	YAP6		2.3481	-0.049169	1.6484	0.39793	1.8158	-0.63183		5.09153	0.966493	3.13486	1.31762	3.52055	0.645357
YOL155W-A			2.3397	0.72775	0.80527	1.0247	1.4571	-0.06373		5.06197	1.65605	1.74747	2.03454	2.74556	0.956787
YFL051C			2.3333	1.0136	0.5354	-0.024981	1.192	-0.41054		5.03957	2.01894	1.44934	0.982834	2.28469	0.752342
YER185W	PUG1		2.33	0.45385	0.48403	1.7174	0.8176	0.3127		5.02805	1.36969	1.39865	3.28843	1.76247	1.24203
YKL107W			2.3277	1.114	1.4005	0.66492	0.66985	-0.006132		5.02004	2.16445	2.63993	1.58548	1.59091	0.995759
YHR031C	RRM3		2.3122	0.97117	2.0389	0.13325	0.42829	-0.88978		4.9664	1.96043	4.10932	1.09676	1.34564	0.539696
YIL046W-A			2.3107	0.97472	1.0386	0.28451	0.15529	0.37279		4.96124	1.96526	2.05423	1.218	1.11365	1.29485
YDR343C	HXT6		2.3097	0.19946	0.79907	0.40722	1.2762	0.18047		4.9578	1.14827	1.73998	1.32613	2.422	1.13325
YBR196C-B			2.3095	1.5938	1.6723	0.66479	0.57857	-1.0246		4.95711	3.01843	3.18722	1.58534	1.49337	0.491547
YBR056W-A			2.3093	0.24839	1.353	2.1001	2.2013	0.41888		4.95643	1.18788	2.55443	4.28739	4.59894	1.33689
YPR015C			2.3038	0.22158	0.39466	0.61364	0.59298	-0.4315		4.93757	1.16601	1.31463	1.53011	1.50836	0.74149
YJL043W			2.2912	1.6197	1.1777	0.94414	0.4867	-0.38013		4.89463	3.07311	2.26216	1.92404	1.40124	0.768368
YOR381W-A			2.2883	0.53545	-0.19212	0.17821	0.44922	-0.066647		4.8848	1.44939	0.875319	1.13148	1.3653	0.954855
YBR072C-A			2.2817	NaN	NaN	0.02166	0.15218	0.10754		4.86251	N/A	N/A	1.01513	1.11125	1.07739
YMR001C-A			2.2756	-0.1845	-0.40566	0.45223	0.77161	-0.24368		4.84199	0.879954	0.754891	1.36815	1.70717	0.844588
YBR201C-A			2.2692	-0.37503	-0.45261	0.92065	0.94082	-0.095606		4.82056	0.771089	0.73072	1.89297	1.91962	0.935879
YLR312C			2.2688	1.2962	0.61584	0.80137	0.34182	0.48803		4.81922	2.45581	1.53245	1.74276	1.26735	1.40253
YER067W	RGI1		2.2679	1.5298	0.44958	2.5339	0.0093823	-0.69853		4.81622	2.88746	1.36564	5.79135	1.00652	0.6162
YNR056C	BIO5		2.2458	0.88076	0.51792	1.6569	0.11334	0.4939		4.743	1.84135	1.43189	3.15338	1.08173	1.40825
YBR221W-A			2.2386	0.0961	NaN	1.3796	0.070854	-0.51554		4.71939	1.06888	N/A	2.60196	1.05034	0.699531
YLR053C			2.233	0.31545	0.0051047	0.9894	0.21306	-0.61798		4.70111	1.2444	1.00354	1.98536	1.15914	0.651583
YHR214C-E			2.2296	0.80591	2.2256	0.76228	0.76966	-0.2043		4.69004	1.74825	4.67705	1.69617	1.70487	0.86796
YDR273W	DON1		2.2216	0.47594	1.3524	1.3962	-0.16538	0.71706		4.6641	1.39082	2.55337	2.63207	0.891694	1.64383
YNL251C	NRD1		2.2134	1.6233	1.5929	0.52529	0.74116	-0.75767		4.63767	3.08079	3.01655	1.43922	1.67152	0.591451
YCL048W-A			2.2076	1.0009	1.504	1.3455	3.0316	0.55705		4.61906	2.00125	2.83628	2.54118	8.17716	1.47126
YPL280W	HSP32		2.2012	0.69973	0.98439	3.6843	0.3503	0.74475		4.59862	1.6242	1.97848	12.8554	1.27483	1.67568
YOR190W	SPR1		2.201	0.12022	0.2935	0.74651	0.53907	-1.1153		4.59798	1.0869	1.22561	1.67773	1.45304	0.461595
YBR128C	ATG14		2.1994	0.82025	1.4764	0.73865	0.51444	-0.59207		4.59288	1.76571	2.78254	1.66861	1.42844	0.66339
YOR313C	SPS4		2.196	0.36721	-0.54944	-0.19619	0.37568	-0.46812		4.58207	1.28986	0.683285	0.872853	1.29745	0.722906
YFL055W	AGP3		2.1941	-0.12422	0.69381	0.97376	0.84896	-0.47038		4.57604	0.9175	1.61755	1.96395	1.8012	0.721774
YPR006C	ICL2		2.1937	0.50643	1.2635	0.62596	0.43294	-0.90319		4.57477	1.42053	2.40077	1.54324	1.34998	0.534703
YHL048C-A			2.1853	0.92731	0.53062	0.95062	-0.11358	0.045372		4.54821	1.90173	1.44455	1.9327	0.924292	1.03195
YNL009W	IDP3		2.1849	0.50697	0.25809	0.99067	0.57593	-0.35908		4.54695	1.42106	1.19589	1.98711	1.49064	0.779662
YCL026C-A	FRM2		2.1805	0.8967	0.70404	1.1267	-0.30923	-0.32467		4.53311	1.8618	1.62906	2.18359	0.807072	0.798481
YOR382W	FIT2		2.1793	1.9884	1.5137	2.0146	2.651	-1.1716		4.52934	3.96797	2.85541	4.04069	6.28102	0.443929
YGR174W-A			2.176	-0.29422	0.54839	0.53306	0.41958	-0.43182		4.51899	0.815513	1.46245	1.447	1.33754	0.741326
YOL047C	LDS2		2.1532	0.85386	0.41909	1.169	0.47341	-0.18346		4.44813	1.80733	1.33708	2.24856	1.38839	0.880589
YGR035C			2.1466	1.1354	0.125	-0.75881	0.17928	-1.8616		4.42783	2.19679	1.09051	0.590984	1.13232	0.275171
YMR084W			2.1365	1.0837	0.53956	1.2145	0.63164	2.0638		4.39694	2.11946	1.45353	2.3206	1.54933	4.18086
YBR296C-A			2.1346	1.0389	0.60234	0.41615	0.71313	1.4301		4.39115	2.05466	1.51818	1.33436	1.63936	2.69465
YNL279W	PRM1		2.1206	-0.016451	0.75251	0.88037	1.0934	0.57177		4.34875	0.988662	1.68472	1.84085	2.13376	1.48635
YMR081C	ISF1		2.1169	0.18966	0.55461	-0.029118	0.6015	-0.50464		4.33761	1.14049	1.46877	0.980019	1.51729	0.704836
YGL033W	HOP2		2.1087	0.62895	0.067045	0.95167	0.52831	0.1034		4.31302	1.54644	1.04757	1.93411	1.44224	1.0743
YKR053C	YSR3		2.1029	0.32385	0.30871	0.61238	0.31213	-0.21387		4.29572	1.25167	1.2386	1.52878	1.24154	0.862221
YJL149W	DAS1		2.1002	0.14335	0.90185	0.5851	0.10525	-0.8597		4.28769	1.10447	1.86846	1.50014	1.07568	0.551067
YDR030C	RAD28		2.0878	1.1385	1.7643	0.76701	0.37271	-0.9207		4.25099	2.20152	3.39709	1.70174	1.29478	0.528253
YBR119W	MUD1		2.0799	0.2761	-0.42004	0.71381	0.076547	-1.1707		4.22778	1.21092	0.747404	1.64013	1.05449	0.444206
YER044C-A	MEI4		2.0641	0.32282	0.85008	-0.23026	0.65958	-0.13212		4.18173	1.25077	1.8026	0.852481	1.57962	0.91249
YBR200W-A			2.0625	NaN	0.22524	0.59599	0.43757	-0.68173		4.1771	N/A	1.16897	1.51151	1.35432	0.623417
YDL214C	PRR2		2.0601	0.87053	1.3888	0.46058	0.091475	-0.12127		4.17015	1.82833	2.61861	1.37609	1.06546	0.919378
YGL179C	TOS3		2.0564	0.087448	0.29685	0.29648	1.7664	-0.63844		4.15947	1.06249	1.22846	1.22814	3.40204	0.642407
YOR011W-A			2.0557	0.71179	NaN	1.8751	0.3305	NaN		4.15745	1.63783	N/A	3.66827	1.25745	N/A
YER054C	GIP2		2.0421	1.243	1.666	0.803	0.39858	1.98		4.11845	2.3669	3.17334	1.74473	1.31821	3.94493
YHL042W			2.0309	0.5942	0.45844	0.96654	0.49868	-0.76214		4.0866	1.50964	1.37406	1.95415	1.41292	0.589621
YJL035C	TAD2		2.0189	1.3244	1.3696	0.63612	1.2731	-0.77956		4.05275	2.50429	2.58399	1.55414	2.4168	0.582544
YOR391C	HSP33		2.0112	0.93727	1.1244	2.9035	0.076794	0.82822		4.03117	1.9149	2.18011	7.48239	1.05467	1.77549
YHR139C	SPS100		2.0108	0.8223	0.69869	1.0196	1.4825	-0.72913		4.03006	1.76822	1.62303	2.02736	2.79433	0.603268
YDL085W	NDE2		2.0105	1.1894	1.5764	0.90007	0.46341	0.53769		4.02922	2.28058	2.98225	1.86616	1.3788	1.45165
YDL022C-A			2.0064	0.13639	-1.0213	-0.18731	-0.041783	-0.76881		4.01778	1.09915	0.492672	0.878242	0.971454	0.586901
YPL222W	FMP40		2.0047	0.76912	2.8352	-0.016252	-0.26661	-1.255		4.01305	1.70423	7.13642	0.988798	0.831271	0.418994
YHR007C-A			2.0041	0.37414	1.225	1.977	2.1803	1.6865		4.01138	1.29607	2.33755	3.93674	4.53248	3.21875
YPL156C	PRM4		2.0038	0.63317	0.48526	0.45946	0.22278	-0.34677		4.01055	1.55097	1.39984	1.37503	1.16698	0.786343
YOL107W			2.0018	0.44507	1.1913	0.55102	0.86104	-1.2806		4.00499	1.36138	2.28358	1.46512	1.81635	0.411624
YGL081W			1.9986	0.75849	1.2805	1.034	0.52206	-0.1082		3.99612	1.69172	2.42923	2.04769	1.436	0.927745
YOR178C	GAC1		1.9977	0.5613	0.32208	0.53261	0.57735	0.4279		3.99363	1.4756	1.25013	1.44654	1.49211	1.34527
YJR151W-A			1.9932	NaN	NaN	NaN	0.00914	-0.30741		3.98119	N/A	N/A	N/A	1.00636	0.808091
YPL027W	SMA1		1.9912	-0.23106	-0.36212	-0.34937	0.43971	0.070058		3.97568	0.852009	0.77802	0.784927	1.35633	1.04976
YGR256W	GND2		1.9849	0.30283	0.57332	0.99854	0.37762	0.28296		3.95835	1.23356	1.48794	1.99798	1.2992	1.21669
YKL038W	RGT1		1.9826	1.4206	1.4063	2.1596	0.75368	-0.44169		3.95205	2.67697	2.65057	4.46791	1.68609	0.736272
YBR297W	MAL33		1.9807	0.75041	0.56242	0.88732	0.088093	0.33379		3.94685	1.68227	1.47674	1.84974	1.06296	1.26032
YIL057C	RGI2		1.9593	0.2865	0.053687	-0.06804	0.14472	0.26559		3.88873	1.21968	1.03791	0.953933	1.10552	1.20213
YOL156W	HXT11		1.9517	0.24206	0.2445	-0.09388	0.65008	-0.3865		3.8683	1.18268	1.18468	0.936999	1.56926	0.764983
YIL101C	XBP1		1.9504	0.17986	0.35426	1.2405	1.377	0.5593		3.86482	1.13277	1.27833	2.3628	2.59728	1.47355
YGR043C	NQM1		1.9491	0.88401	0.76927	0.59602	0.89664	0.60948		3.86134	1.8455	1.70441	1.51154	1.86173	1.52571
YIR019C	FLO11		1.9478	1.0247	-0.21581	0.64335	1.8966	0.40879		3.85786	2.03454	0.861063	1.56195	3.72335	1.32757
YLR377C	FBP1		1.9392	0.17948	0.18987	0.71239	1.5168	-0.7457		3.83493	1.13248	1.14066	1.63852	2.86156	0.596378
YMR085W			1.9247	0.68808	0.24047	1.0367	0.58342	1.1079		3.79658	1.61114	1.18138	2.05153	1.4984	2.15532
YOL052C-A	DDR2		1.923	1.8072	1.9425	2.5945	2.7526	1.4717		3.79211	3.49962	3.84371	6.0398	6.73931	2.77349
YDR007W	TRP1		1.9183	0.96554	0.66474	-0.40467	1.2572	-1.4503		3.77977	1.95279	1.58528	0.755409	2.39031	0.365945
YLR174W	IDP2		1.9173	1.6956	1.5545	1.7769	1.3528	0.44991		3.77716	3.23912	2.93732	3.42689	2.55407	1.36596
YNL018C			1.9159	0.40544	-0.55803	0.56998	0.50953	-0.13922		3.77349	1.32449	0.679229	1.4845	1.42359	0.90801
YJR130C	STR2		1.9149	0.27377	1.7329	0.45579	-0.92033	0.090349		3.77088	1.20896	3.32395	1.37153	0.528388	1.06463
YIL024C			1.9096	0.2403	-0.053326	2.4776	2.2627	0.84857		3.75705	1.18124	0.963712	5.5697	4.79889	1.80072
YHR022C-A			1.909	0.51993	-0.12921	0.57201	0.15029	-0.69563		3.75549	1.43389	0.914332	1.48659	1.10979	0.61744
YMR306W	FKS3		1.9079	0.81807	0.99916	1.0363	0.98783	-0.53715		3.75262	1.76305	1.99884	2.05096	1.9832	0.689131
YPL130W	SPO19		1.905	0.27275	-0.2066	0.048156	0.5169	1.3089		3.74509	1.20811	0.866577	1.03394	1.43088	2.47753
YMR322C	SNO4		1.8961	0.27788	0.86699	3.1302	0.0099238	0.80629		3.72206	1.21241	1.82385	8.75556	1.0069	1.74871
YBL008W-A			1.8912	0.33997	0.69494	0.45503	-0.087219	0.41224		3.70944	1.26573	1.61882	1.37081	0.941336	1.33075
YOR222W	ODC2		1.8912	0.56099	0.63121	1.3987	0.12575	-0.16031		3.70944	1.47528	1.54886	2.63664	1.09107	0.894833
YOR289W			1.8892	0.66963	0.46602	0.5472	-0.50752	-0.27551		3.7043	1.59066	1.38129	1.46125	0.703431	0.826158
YLL066W-B			1.8878	0.32981	-0.82054	-0.9729	-0.90996	-1.4192		3.7007	1.25685	0.56623	0.509481	0.5322	0.37392
YPR007C	REC8		1.8838	0.43814	0.10352	0.37887	0.21233	0.60409		3.69046	1.35486	1.07439	1.30032	1.15856	1.52002
YIR014W			1.8826	1.0154	2.5761	0.49178	-0.15842	-0.50027		3.68739	2.02146	5.96325	1.40618	0.896006	0.706974
YMR137C	PSO2		1.88	0.36248	0.38304	-0.1877	-0.14348	-0.36458		3.68075	1.28563	1.30409	0.878004	0.905333	0.776695
YOR339C	UBC11		1.8773	1.4749	0.28846	0.82758	0.4259	-0.6552		3.67387	2.77964	1.22134	1.77471	1.34341	0.634987
YDR403W	DIT1		1.8764	0.29057	0.36548	0.8989	0.74098	-0.39477		3.67158	1.22312	1.28831	1.86464	1.67131	0.760611
YPR200C	ARR2		1.8704	0.38913	0.096107	-0.22861	0.2136	-0.69941		3.65634	1.3096	1.06889	0.853457	1.15958	0.615824
YDR076W	RAD55		1.8679	1.2129	1.5682	0.33742	0.3088	-0.51222		3.65001	2.31803	2.96535	1.2635	1.23868	0.701143
YOR214C	SPR2		1.8598	0.68103	NaN	1.1953	0.22911	1.1619		3.62957	1.60328	N/A	2.28992	1.17211	2.23752
YLR092W	SUL2		1.8586	0.34205	0.74928	1.1124	0.65493	-0.44681		3.62656	1.26756	1.68095	2.16205	1.57454	0.733663
YCL001W-A			1.8557	0.84435	-0.079137	0.36191	-0.24067	-1.1384		3.61927	1.79546	0.946624	1.28513	0.846352	0.454263
YER085C			1.8529	0.32784	0.046269	-0.45207	0.17201	-0.0027747		3.61226	1.25513	1.03259	0.730993	1.12663	0.998079
YOR009W	TIR4		1.8529	0.93432	1.0279	1.1481	0.71246	-1.2074		3.61226	1.91099	2.03905	2.21622	1.6386	0.433048
YEL073C			1.8491	0.03996	-0.064148	1.0898	-0.47644	-0.48442		3.60275	1.02809	0.95651	2.12845	0.718749	0.714784
YGR249W	MGA1		1.8425	-0.49793	-0.33376	0.29047	1.2875	-0.469		3.58631	0.708122	0.793466	1.22304	2.44105	0.722465
YHR212W-A			1.8308	0.87829	0.84482	0.56371	1.7096	0.27492		3.55734	1.8382	1.79604	1.47807	3.2707	1.20993
YDL079C	MRK1		1.825	0.20695	0.14653	0.50476	0.72995	-0.70324		3.54307	1.15425	1.1069	1.41889	1.65858	0.614191
YFL053W	DAK2		1.8241	0.34387	-0.27293	0.47889	0.18477	-1.1086		3.54086	1.26916	0.827637	1.39367	1.13664	0.463744
YOL051W	GAL11		1.8203	0.20918	-0.26615	0.31446	0.035704	-0.57173		3.53155	1.15603	0.831536	1.24355	1.02506	0.67281
YML007C-A			1.818	-0.33462	0.25124	0.24642	1.0454	-0.12153		3.52592	0.792993	1.19023	1.18626	2.06394	0.919212
YAL037C-A			1.8161	0.9503	NaN	1.487	1.9647	0.32049		3.52128	1.93227	N/A	2.80305	3.90332	1.24875
YLR070C	XYL2		1.8111	-0.28928	0.88278	0.5176	0.85768	-0.3379		3.5091	0.81831	1.84393	1.43157	1.81212	0.791192
YOL123W	HRP1		1.8105	0.90311	-0.32519	1.1668	0.68429	0.91596		3.50764	1.87009	0.798193	2.24513	1.60691	1.88682
YOL132W	GAS4		1.8098	0.31612	0.13551	0.42543	0.77987	-1.0521		3.50594	1.24498	1.09848	1.34297	1.71698	0.482266
YLR327C	TMA10		1.8078	1.7553	-0.31009	1.2982	1.4386	0.73537		3.50108	3.37597	0.806591	2.45922	2.71058	1.66482
YGR213C	RTA1		1.7994	0.32493	0.44562	0.71894	1.156	-0.67692		3.48075	1.2526	1.3619	1.64597	2.22839	0.625499
YHR213W			1.7961	0.84232	1.3463	0.88608	1.9299	0.4734		3.4728	1.79293	2.54259	1.84815	3.81029	1.38838
YKR097W	PCK1		1.7852	0.41685	0.21582	0.1567	0.50956	0.90795		3.44666	1.33501	1.16136	1.11473	1.42362	1.87638
YFR017C	IGD1		1.7851	0.71769	0.024299	0.33981	0.7109	0.1557		3.44642	1.64455	1.01699	1.26559	1.63682	1.11396
YLR142W	PUT1		1.7845	-0.18095	-0.33371	0.8993	0.63124	-0.74685		3.44499	0.882122	0.793493	1.86516	1.5489	0.595903
YOR019W			1.7774	0.64968	0.58649	0.62568	0.47961	-0.36191		3.42808	1.56882	1.50159	1.54294	1.39437	0.778134
YFR015C	GSY1		1.7756	0.60528	0.55484	0.97171	0.025903	0.27244		3.4238	1.52127	1.46901	1.96116	1.01812	1.20785
YMR316C-A			1.7742	0.36813	0.42682	1.6691	0.93428	-0.0067468		3.42048	1.29068	1.34427	3.18016	1.91094	0.995334
YDR263C	DIN7		1.7708	0.11767	-0.37787	2.206	0.66413	1.0309		3.41243	1.08498	0.769573	4.61394	1.58461	2.0433
YDR124W			1.7672	0.34224	0.013364	0.92929	1.0706	-0.42804		3.40393	1.26772	1.00931	1.90434	2.10031	0.743271
YGR288W	MAL13		1.764	0.95763	0.41387	0.93723	-0.13493	-0.21047		3.39638	1.94212	1.33225	1.91485	0.910714	0.864256
YNL034W			1.7634	0.08221	-0.8271	0.10455	0.61715	-0.049988		3.39497	1.05864	0.563661	1.07516	1.53384	0.965944
YBR240C	THI2		1.7632	0.76588	0.76034	0.6677	0.77527	-0.64903		3.3945	1.70041	1.69389	1.58854	1.71151	0.637709
YJL219W	HXT9		1.7589	0.21058	0.026531	0.061762	0.48554	-0.53175		3.3844	1.15715	1.01856	1.04374	1.40011	0.691715
YER121W			1.7586	0.69356	-0.15175	0.27392	0.48046	0.55762		3.3837	1.61727	0.900158	1.20909	1.39519	1.47184
YDR522C	SPS2		1.7584	1.2219	0.76549	0.63478	0.7424	-0.75277		3.38323	2.33254	1.69995	1.5527	1.67296	0.593463
YOR031W	CRS5		1.7519	0.63399	0.13794	1.0735	0.050618	-1.0096		3.36802	1.55185	1.10033	2.10453	1.03571	0.496684
YFR032C	RRT5		1.7512	0.77281	0.22192	-0.25788	0.77347	0.58939		3.36638	1.70859	1.16628	0.836316	1.70938	1.50461
YGR066C			1.7436	0.91597	0.32146	0.4397	0.35488	-0.88375		3.3487	1.88684	1.24959	1.35632	1.27888	0.541957
YMR018W			1.7408	0.65814	0.29241	0.3897	0.79579	-0.5829		3.3422	1.57805	1.22468	1.31012	1.73603	0.66762
YPR030W	CSR2		1.7387	1.1162	0.94874	0.1796	0.22512	0.50444		3.33734	2.16775	1.93019	1.13257	1.16887	1.41857
YCR010C	ADY2		1.7367	0.5151	-0.30961	0.57382	0.1363	-0.38594		3.33272	1.42909	0.80686	1.48846	1.09908	0.76528
YNL210W	MER1		1.7344	0.96973	0.83108	0.12305	1.5654	-0.34432		3.32741	1.95847	1.77902	1.08903	2.9596	0.787679
YBL100W-C			1.7334	-0.10638	0.72118	1.05	0.2341	-0.36509		3.32511	0.928916	1.64853	2.07053	1.17617	0.77642
YJL144W			1.7329	1.6278	0.67573	1.6113	0.83225	-0.45991		3.32395	3.09041	1.5974	3.05527	1.78046	0.727032
YEL072W	RMD6		1.7323	0.66022	0.03907	0.83717	0.31548	-1.1885		3.32257	1.58032	1.02745	1.78654	1.24443	0.438759
YMR169C	ALD3		1.7317	0.43375	1.2117	0.6699	1.1404	-0.52138		3.32119	1.35074	2.3161	1.59096	2.20442	0.696705
YLR030W			1.7311	0.82573	0.34074	1.1627	0.72929	-0.26565		3.31981	1.77243	1.26641	2.23876	1.65782	0.831824
YJR159W	SOR1		1.7287	0.013705	1.2235	0.5752	0.31059	-0.70902		3.31429	1.00954	2.33513	1.48988	1.24021	0.611736
YKR009C	FOX2		1.7247	0.2137	0.33327	0.0055401	0.28837	-0.62632		3.30511	1.15966	1.25987	1.00385	1.22126	0.647827
YER045C	ACA1		1.7233	0.8432	0.83232	0.98757	1.1166	-0.44388		3.30191	1.79403	1.78055	1.98284	2.16835	0.735155
YIL045W	PIG2		1.7195	0.89108	-0.21238	0.82887	-0.95363	-0.45615		3.29322	1.85456	0.863112	1.77629	0.516332	0.728929
YJL028W			1.7156	0.35812	0.80575	0.5197	0.15977	0.29652		3.28433	1.28175	1.74805	1.43366	1.11711	1.22818
YNL142W	MEP2		1.7124	0.48469	0.27582	0.91312	1.2133	-0.87024		3.27706	1.39929	1.21068	1.88311	2.31867	0.547056
YKL055C	OAR1		1.7019	0.61271	1.6903	-0.042835	0.014158	-0.4614		3.25329	1.52913	3.22724	0.970745	1.00986	0.726281
YGR030C	POP6		1.6969	-0.3186	0.18104	0.57058	0.00077899	-2.3388		3.24204	0.801848	1.1337	1.48512	1.00054	0.197675
YPL113C			1.6956	1.2182	1.2496	0.62471	0.89511	-0.66797		3.23912	2.32656	2.37775	1.5419	1.85975	0.629392
YMR272W-B			1.6858	-0.35815	-0.017257	1.3812	0.95986	-0.25501		3.21719	0.780164	0.98811	2.60485	1.94512	0.837981
YLR406C-A			1.676	0.53983	0.90834	0.62397	1.1907	-0.30384		3.19541	1.4538	1.87688	1.54111	2.28263	0.810093
YEL049W	PAU2		1.6747	0.50461	0.14782	0.82841	0.048235	-0.47527		3.19253	1.41874	1.10789	1.77573	1.034	0.719332
YML083C			1.6746	0.34579	0.60725	1.4064	0.66175	-0.87157		3.19231	1.27085	1.52335	2.65075	1.582	0.546552
YDL186W			1.6728	0.62764	0.91665	-0.46271	0.8976	-0.81488		3.18833	1.54504	1.88773	0.725622	1.86296	0.568456
YHR175W-A			1.6726	-0.0508	-0.13804	1.2411	0.63715	4.1406		3.18789	0.965401	0.908753	2.36379	1.55525	17.6378
YIL107C	PFK26		1.6658	1.1502	0.69789	1.2237	0.87857	0.39877		3.1729	2.21945	1.62213	2.33545	1.83855	1.31838
YCR020C	PET18		1.664	0.42917	-0.14051	1.7272	1.2347	-0.23648		3.16894	1.34646	0.907198	3.31085	2.35332	0.848814
YOL108C	INO4		1.6613	-0.050897	-0.53673	0.23709	-0.22807	0.41613		3.16301	0.965336	0.689332	1.17861	0.853776	1.33434
YMR117C	SPC24		1.6604	-0.14273	0.8192	-0.075611	0.40612	-1.0955		3.16104	0.905803	1.76443	0.94894	1.32512	0.467974
YGR050C			1.6592	0.047134	0.036176	0.77417	0.96607	-0.73435		3.15841	1.03321	1.02539	1.71021	1.95351	0.601089
YBR147W	RTC2		1.6532	0.13458	0.28866	0.88231	-2.3606	1.0263		3.14531	1.09777	1.22151	1.84332	0.19471	2.03679
YFL020C	PAU5		1.6444	0.50159	-0.10366	0.80827	0.89935	-0.57985		3.12618	1.41577	0.930669	1.75111	1.86523	0.669033
YNL144C			1.6351	0.77829	-0.027377	-0.23035	0.055291	-0.38996		3.10609	1.7151	0.981203	0.852428	1.03907	0.763151
YOL015W	IRC10		1.6318	0.50894	-0.16233	0.64365	0.027746	-0.31998		3.09899	1.423	0.893581	1.56228	1.01942	0.801081
YBR301W	PAU24		1.6265	0.53137	0.15127	0.84238	-0.43785	-0.64879		3.08763	1.4453	1.11055	1.79301	0.738234	0.637815
YBL049W	MOH1		1.626	0.13343	0.21655	1.3025	0.4171	0.86613		3.08656	1.0969	1.16195	2.46656	1.33524	1.82277
YAL063C-A			1.6186	-0.0068808	0.61675	0.56433	0.53787	-0.4204		3.07077	0.995242	1.53342	1.4787	1.45183	0.747217
YPL189W	GUP2		1.6185	-0.24128	-0.45524	-0.42514	0.66943	-0.6951		3.07056	0.845994	0.729389	0.744766	1.59044	0.617667
YKR019C	IRS4		1.6177	-0.011558	0.57988	-0.19656	-0.087175	-0.70534		3.06885	0.992021	1.49472	0.872629	0.941364	0.613298
YLR431C	ATG23		1.6165	0.09763	0.012703	0.21621	2.3965	-0.55235		3.0663	1.07001	1.00884	1.16168	5.26524	0.681908
YDL246C	SOR2		1.6156	0.01955	1.5823	0.79366	0.46579	-0.60522		3.06439	1.01364	2.99447	1.73347	1.38107	0.657371
YCL001W-B			1.6127	1.026	0.48646	0.57999	0.53271	-0.59887		3.05824	2.03637	1.401	1.49484	1.44664	0.660271
YDR126W	SWF1		1.6098	0.088803	-0.42128	0.4799	0.21848	-0.61038		3.0521	1.06349	0.746762	1.39465	1.16351	0.655024
YMR317W			1.6061	0.7163	0.15247	0.027785	0.42911	-0.316		3.04428	1.64296	1.11147	1.01945	1.3464	0.803294
YBR296C	PHO89		1.606	-0.40404	-0.65526	-1.1642	-0.20885	-0.50666		3.04407	0.755739	0.634961	0.446212	0.865227	0.70385
YPR001W	CIT3		1.606	0.23407	0.35517	0.4421	0.58821	-0.56064		3.04407	1.17615	1.27914	1.35858	1.50338	0.678001
YDL114W			1.6043	0.17428	0.59337	0.49421	0.58936	0.46256		3.04048	1.1284	1.50877	1.40855	1.50458	1.37798
YJL161W	FMP33		1.6041	0.73102	1.0031	1.0625	0.41486	0.29055		3.04006	1.65981	2.0043	2.08855	1.33317	1.22311
YDL021W	GPM2		1.5967	1.0464	0.51325	1.3365	-0.75219	-0.13751		3.02451	2.06537	1.42726	2.52538	0.593702	0.909087
YNL138W-A	YSF3		1.5952	0.1539	0.07445	0.74717	0.51906	-1.7228		3.02136	1.11257	1.05296	1.6785	1.43302	0.30296
YOR173W	DCS2		1.5945	1.5876	0.61022	1.0035	0.28217	0.13836		3.0199	3.00549	1.52649	2.00486	1.21602	1.10065
YLR012C			1.5927	-0.158	-0.17379	0.42412	0.41775	-0.26292		3.01613	0.896267	0.886511	1.34175	1.33584	0.833399
YDR260C	SWM1		1.5923	0.2976	1.3682	0.18976	0.97097	-0.5545		3.0153	1.2291	2.58148	1.14057	1.96016	0.680893
YGL235W			1.592	-0.14044	0.66892	-0.72748	0.56514	-0.24677		3.01467	0.907242	1.58988	0.603958	1.47953	0.842781
YJR011C			1.5896	-0.46977	-0.88471	0.012922	-0.30044	-1.4652		3.00966	0.72208	0.541596	1.009	0.812005	0.362185
YMR180C	CTL1		1.5891	0.16665	0.31901	0.94788	1.0399	-0.8319		3.00862	1.12245	1.24747	1.92904	2.05609	0.561789
YCR007C			1.589	0.58959	0.11732	0.87419	0.87238	-0.64844		3.00841	1.50482	1.08472	1.83298	1.83068	0.63797
YLR125W			1.587	-0.052122	-0.42075	0.59827	0.27138	-0.43317		3.00424	0.964517	0.747036	1.5139	1.20696	0.740633
YHR176W	FMO1		1.5859	0.47538	0.0094002	0.61936	0.24235	0.80858		3.00195	1.39028	1.00654	1.53619	1.18292	1.75149
YBL078C	ATG8		1.5807	0.45887	0.36381	1.1036	0.11505	0.47408		2.99115	1.37446	1.28682	2.1489	1.08301	1.38903
YBR145W	ADH5		1.5803	0.45419	1.0637	0.26957	-1.9259	-0.27445		2.99032	1.37001	2.09029	1.20545	0.263176	0.826765
YOL084W	PHM7		1.5777	0.063354	0.39785	0.74845	1.1437	-0.4603		2.98494	1.04489	1.31754	1.67999	2.20947	0.726835
YKR058W	GLG1		1.5754	0.81348	0.44544	0.55805	-0.59182	-0.23771		2.98018	1.75745	1.36173	1.47228	0.663505	0.84809
YKR103W	NFT1		1.5752	0.79783	0.68735	0.37717	0.89847	-0.50395		2.97977	1.73848	1.61032	1.29879	1.86409	0.705173
YOR383C	FIT3		1.5729	1.9878	1.4413	0.62255	1.4342	-1.0901		2.97502	3.96632	2.71565	1.53959	2.70232	0.469729
YGL230C			1.5724	1.0097	0.67231	2.0517	0.38218	-0.59635		2.97399	2.01349	1.59362	4.14594	1.30331	0.661425
YJL221C	IMA4		1.569	0.68034	0.41398	0.12636	0.013879	-0.99305		2.96699	1.60252	1.33236	1.09154	1.00967	0.502414
YMR315W-A			1.5689	-0.11381	0.7467	0.93617	0.97526	-0.1308		2.96678	0.924144	1.67795	1.91344	1.966	0.913325
YGR287C	IMA1		1.5672	0.47089	0.5288	0.095396	0.39141	-0.74399		2.96329	1.38596	1.44273	1.06836	1.31167	0.597086
YCR101C			1.5665	-1.4581	0.50326	0.53489	-0.84317	0.75193		2.96185	0.363972	1.41741	1.44883	0.557417	1.68404
YIL092W			1.5631	0.42357	1.9614	-0.011618	-0.30222	-0.16772		2.95488	1.34124	3.8944	0.991979	0.811003	0.890248
YER046W	SPO73		1.5599	0.33615	0.027318	0.83818	0.8151	-0.32851		2.94833	1.26238	1.01912	1.78779	1.75942	0.796359
YNL014W	HEF3		1.5536	0.69419	0.45933	0.76107	0.21738	-0.13327		2.93549	1.61798	1.3749	1.69475	1.16262	0.911763
YGL185C			1.5502	0.25631	1.1007	-0.28408	-0.24546	-1.0482		2.92858	1.19442	2.14459	0.821265	0.843547	0.483571
YJL037W	IRC18		1.5472	-0.051437	-0.45817	1.1865	0.85969	-0.14287		2.92249	0.964975	0.727909	2.276	1.81465	0.905716
YLR137W	RKM5		1.5469	0.51606	1.0372	0.85953	0.6825	-1.278		2.92189	1.43004	2.05224	1.81445	1.60492	0.412367
YKL124W	SSH4		1.544	1.0144	0.49919	0.63312	-0.069542	-0.045912		2.91602	2.02006	1.41342	1.55092	0.95294	0.968677
YOR100C	CRC1		1.5426	0.74891	0.92831	0.95265	0.20476	-0.46376		2.91319	1.68052	1.90305	1.93542	1.15249	0.725094
YGL010W	MPO1		1.5293	0.31239	-0.035867	0.8952	0.54856	-0.71816		2.88646	1.24176	0.975445	1.85987	1.46263	0.607872
YOL024W			1.5292	-0.23629	0.039592	1.2004	0.43086	0.35136		2.88626	0.848926	1.02782	2.29803	1.34804	1.27576
YOL157C	IMA2		1.5282	0.8176	0.66524	-0.06988	-0.078211	-1.0021		2.88426	1.76247	1.58583	0.952717	0.947232	0.499273
YDR043C	NRG1		1.5267	-0.0039083	0.1827	1.3807	0.91302	-0.58886		2.88126	0.997295	1.13501	2.60395	1.88298	0.664868
YBR186W	PCH2		1.5197	0.20918	0.20872	0.023577	0.94578	-1.2354		2.86731	1.15603	1.15566	1.01648	1.92623	0.424725
YHL040C	ARN1		1.5189	0.72201	0.18074	0.77791	1.7079	-0.32176		2.86572	1.64948	1.13347	1.71465	3.26685	0.800093
YDR182W-A			1.5176	-0.041416	-0.061073	1.964	0.8412	-0.33386		2.86314	0.971701	0.958551	3.90142	1.79154	0.793411
YNR057C	BIO4		1.5151	0.18034	-0.059691	0.83581	0.30667	-0.30941		2.85819	1.13315	0.95947	1.78486	1.23685	0.806972
YMR196W			1.5113	0.99009	1.3974	0.79848	0.25834	-0.20251		2.85067	1.98631	2.63426	1.73927	1.1961	0.869037
YMR174C	PAI3		1.5035	0.27323	0.32172	0.65517	0.31694	-0.49003		2.8353	1.20851	1.24982	1.5748	1.24569	0.71201
YOR012W			1.501	0.24755	0.6879	0.60353	0.99975	-0.81739		2.83039	1.18719	1.61094	1.51943	1.99965	0.567468
YKL106C-A			1.5009	0.39312	0.29515	0.23692	0.90534	-0.3075		2.83019	1.31323	1.22701	1.17847	1.87299	0.808041
YLR165C	PUS5		1.5003	0.32139	0.12423	0.67424	0.54308	-0.6013		2.82902	1.24953	1.08993	1.59576	1.45708	0.65916
YGR289C	MAL11		1.4978	-0.056536	0.19584	0.26277	0.99882	-0.75166		2.82412	0.96157	1.14539	1.19978	1.99836	0.59392
YJR061W			1.4978	0.23253	-0.027682	2.4074	0.13947	-0.7728		2.82412	1.17489	0.980995	5.30517	1.1015	0.58528
YOL166W-A			1.4975	0.6094	0.27369	-0.13916	-0.61302	-0.4506		2.82353	1.52562	1.2089	0.908048	0.653827	0.731738
YGR294W	PAU12		1.4954	0.57121	0.19798	1.0034	-0.19879	-0.46081		2.81942	1.48577	1.14709	2.00472	0.871281	0.726578
YLR218C	COA4		1.4936	0.2111	0.75216	0.42011	0.7667	-1.4661		2.81591	1.15757	1.68431	1.33803	1.70137	0.361959
YHR216W	IMD2		1.4934	-1.0539	1.5981	1.8827	0.14358	-3.1318		2.81552	0.481664	3.02744	3.68765	1.10464	0.114087
YDR246W-A			1.4931	-0.21206	-0.18494	0.41548	1.0871	-0.088082		2.81493	0.863304	0.879686	1.33374	2.12447	0.940773
YDR113C	PDS1		1.492	-0.43184	0.47906	-0.32453	-0.020513	-0.61703		2.81279	0.741316	1.39384	0.798558	0.985882	0.652012
YLR341W	SPO77		1.4916	-0.10513	0.57709	0.37622	1.4639	-0.6987		2.81201	0.929721	1.49184	1.29794	2.75853	0.616127
YDR381C-A			1.4909	0.13907	0.2795	-0.039424	0.29467	-0.51995		2.81064	1.1012	1.21377	0.973043	1.2266	0.697396
YLR453C	RIF2		1.49	0.080082	0.1649	0.30236	0.74834	-0.52041		2.80889	1.05708	1.12109	1.23316	1.67986	0.697174
YHL022C	SPO11		1.4899	0.07884	0.050293	0.47595	0.66792	-0.80915		2.8087	1.05617	1.03548	1.39083	1.58878	0.570718
YOR349W	CIN1		1.4865	0.32362	1.145	0.78617	0.97148	-0.75088		2.80208	1.25147	2.21146	1.72449	1.96085	0.594241
YOR192C	THI72		1.4862	-0.021697	-0.3164	0.54152	0.39959	0.34071		2.8015	0.985073	0.803071	1.45551	1.31913	1.26638
YLR149C			1.4856	1.3563	0.77371	0.64344	0.10572	0.12557		2.80034	2.56028	1.70966	1.56205	1.07603	1.09094
YLR042C			1.4826	-0.20521	0.36119	0.6065	1.6467	-0.80686		2.79452	0.867412	1.28448	1.52256	3.13117	0.571625
YJL089W	SIP4		1.4822	0.61693	1.5646	1.2917	-0.13115	-0.34289		2.79374	1.53361	2.95795	2.44816	0.913103	0.78846
YLR004C	THI73		1.4815	0.533	0.61319	0.327	0.53854	-0.57754		2.79239	1.44693	1.52964	1.2544	1.4525	0.670105
YDL244W	THI13		1.479	0.1373	0.39681	0.93337	-0.38926	0.26664		2.78755	1.09984	1.31659	1.90973	0.763521	1.203
YAL054C	ACS1		1.4789	0.66785	0.84361	0.15797	1.712	-0.47283		2.78736	1.5887	1.79453	1.11572	3.27615	0.72055
YIL054W			1.4775	0.8893	0.31586	0.46198	-0.12232	-0.29975		2.78466	1.85228	1.24475	1.37743	0.918709	0.812393
YPL230W	USV1		1.4729	0.79388	0.63688	0.28969	0.46126	0.53747		2.77579	1.73373	1.55496	1.22238	1.37674	1.45142
YJR010W	MET3		1.4727	-0.15133	0.26815	0.47378	0.79697	-0.70629		2.77541	0.90042	1.20426	1.38874	1.73745	0.612894
YDR542W	PAU10		1.4718	0.31847	0.18534	0.73482	-0.62881	-0.39312		2.77368	1.24701	1.13708	1.66419	0.64671	0.761481
YGL258W-A			1.4704	-0.36295	0.88608	0.17397	NaN	0.72345		2.77099	0.777573	1.84815	1.12816	N/A	1.65113
YCR021C	HSP30		1.4676	1.2287	0.37818	2.4807	0.34154	0.96263		2.76561	2.34356	1.2997	5.58168	1.26711	1.94886
YGL015C			1.4615	0.31746	-0.11372	1.0257	0.13224	-0.0011529		2.75395	1.24613	0.924202	2.03595	1.09599	0.999201
YJR156C	THI11		1.461	-0.17714	0.27894	0.46967	-0.0066003	0.38427		2.75299	0.884455	1.2133	1.38479	0.995435	1.3052
YOR365C			1.4587	1.31	0.75497	0.67783	0.6227	-0.24206		2.74861	2.47942	1.6876	1.59973	1.53975	0.845537
YMR271C	URA10		1.4564	0.42315	0.31436	0.70169	1.2225	-1.0198		2.74423	1.34085	1.24346	1.62641	2.33351	0.493185
YHR079C-A	SAE3		1.4552	-0.22131	1.1209	1.015	0.46975	-0.45799		2.74195	0.857786	2.17483	2.0209	1.38487	0.728
YBL108C-A	PAU9		1.454	0.15467	-0.28981	0.45016	0.39255	-0.44401		2.73967	1.11317	0.81801	1.36619	1.31271	0.735089
YAR050W	FLO1		1.4504	0.47195	0.51731	0.5412	3.7568	-0.082352		2.73284	1.38698	1.43128	1.45518	13.5179	0.944517
YLR346C			1.4495	0.88657	-0.16594	-0.011094	-1.0145	-1.2178		2.73113	1.84878	0.891348	0.99234	0.495	0.429938
YJL136W-A			1.4485	0.30019	-0.05123	0.77584	0.87327	-0.08859		2.72924	1.23131	0.965113	1.71219	1.83181	0.940441
YCL016C	DCC1		1.4457	-0.20354	0.84245	0.64689	0.24714	-0.76516		2.72395	0.868417	1.79309	1.56579	1.18685	0.588388
YML128C	MSC1		1.4446	1.1482	1.2182	1.3841	1.1395	0.35597		2.72187	2.21637	2.32656	2.61009	2.20305	1.27985
YGR161C	RTS3		1.4421	0.96984	0.73491	0.55306	0.2146	0.3524		2.71716	1.95862	1.66429	1.46719	1.16038	1.27668
YDR540C	IRC4		1.4418	-0.15758	-0.20331	0.48802	-0.24679	-1.5785		2.7166	0.896528	0.868556	1.40252	0.842769	0.33483
YLL042C	ATG10		1.4398	-0.22481	-0.4698	0.37164	1.2404	0.10348		2.71283	0.855708	0.722065	1.29382	2.36264	1.07436
YFL041W-A			1.4396	0.11268	0.19883	0.29249	0.47245	-0.68613		2.71246	1.08123	1.14777	1.22475	1.38746	0.621519
YOR272W	YTM1		1.431	-0.42995	-0.34257	0.23484	0.15518	-1.2065		2.69634	0.742288	0.788635	1.17678	1.11356	0.433319
YMR068W	AVO2		1.4292	0.43101	1.4177	0.87035	0.63936	-0.97338		2.69297	1.34818	2.67159	1.82811	1.55764	0.509311
YGL236C	MTO1		1.4279	-0.31158	0.71242	-0.79067	0.28774	-0.84376		2.69055	0.805759	1.63855	0.578076	1.22073	0.55719
YNL277W-A			1.4236	0.031062	0.53595	1.4863	0.74744	-0.48481		2.68254	1.02176	1.4499	2.8017	1.67881	0.714591
YBR255C-A			1.4226	0.35687	0.86011	0.43667	0.62544	-0.32126		2.68068	1.28064	1.81518	1.35348	1.54268	0.800371
YGL261C	PAU11		1.4206	0.17675	-0.020541	0.35352	-0.015073	-0.51964		2.67697	1.13033	0.985863	1.27767	0.989607	0.697546
YJR103W	URA8		1.4188	0.15865	2.0297	1.6379	0.2216	-0.8748		2.67363	1.11624	4.0832	3.11212	1.16603	0.545329
YLR461W	PAU4		1.4174	0.37528	0.17007	0.85768	-0.69445	-0.4912		2.67104	1.29709	1.12511	1.81212	0.617945	0.711433
YPL216W			1.4128	0.37538	0.10992	0.62923	0.44658	-0.89136		2.66253	1.29718	1.07917	1.54674	1.36281	0.539106
YFL003C	MSH4		1.4123	0.63437	0.12135	0.26401	0.070784	-0.13203		2.66161	1.55226	1.08775	1.20081	1.05029	0.912547
YKR102W	FLO10		1.4114	0.04658	-0.18288	0.95132	1.0739	0.23454		2.65995	1.03281	0.880943	1.93364	2.10512	1.17653
YNL332W	THI12		1.4101	0.20471	0.42773	0.9726	-0.29946	0.4771		2.65756	1.15245	1.34512	1.96237	0.812556	1.39194
YKL065W-A			1.4088	-0.88378	-0.30774	-0.62377	0.40369	-0.83225		2.65516	0.541946	0.807906	0.648973	1.32289	0.561653
YJL045W			1.4078	0.70289	0.24549	0.48596	0.4195	-0.11357		2.65332	1.62776	1.1855	1.40052	1.33746	0.924298
YDL204W	RTN2		1.4077	0.76172	0.71139	1.0675	0.85195	0.75502		2.65314	1.69551	1.63738	2.0958	1.80494	1.68765
YJR008W	MHO1		1.4073	0.63197	0.20885	1.3813	-0.21382	-0.44017		2.6524	1.54968	1.15577	2.60503	0.862251	0.737048
YHL043W	ECM34		1.4069	0.076563	0.11071	0.2485	0.52941	-0.89021		2.65167	1.0545	1.07976	1.18797	1.44334	0.539536
YDR223W	CRF1		1.4063	0.19176	0.61042	1.0832	1.6071	0.17874		2.65057	1.14216	1.5267	2.11873	3.04639	1.13189
YPR061C	JID1		1.4014	0.59366	0.60808	-0.59533	0.45178	-1.1082		2.64158	1.50907	1.52423	0.661893	1.36773	0.463872
YGL260W			1.4011	0.3724	0.67223	0.31608	-0.62416	0.22382		2.64103	1.2945	1.59353	1.24494	0.648797	1.16782
YMR247W-A			1.4011	0.43361	0.41367	1.0421	-0.12822	-0.26836		2.64103	1.35061	1.33207	2.05922	0.91496	0.830263
YML118W	NGL3		1.4	0.68465	0.63877	0.61484	0.13998	-0.4955		2.63902	1.60731	1.557	1.53139	1.10189	0.709316
YHL036W	MUP3		1.3995	-0.15652	-0.043066	0.55514	-0.25111	0.13389		2.6381	0.897187	0.97059	1.46931	0.84025	1.09725
YNL286W	CUS2		1.3957	0.1029	-0.27559	1.3365	-0.38423	-0.44321		2.63116	1.07393	0.826112	2.52538	0.766188	0.735496
YOL104C	NDJ1		1.3933	-0.076861	0.2354	-0.059442	0.77981	-1.3464		2.62679	0.948118	1.17723	0.959635	1.7169	0.393272
YOL161C	PAU20		1.3905	-0.039517	-0.024731	0.33967	-0.27654	-0.34194		2.6217	0.972981	0.983004	1.26547	0.825569	0.78898
YOR344C	TYE7		1.388	0.1029	0.74038	-0.58806	0.20642	-0.65612		2.61716	1.07393	1.67062	0.665237	1.15382	0.634583
YPL056C	LCL1		1.3879	-0.31061	-0.67874	0.47391	0.58599	-0.58372		2.61697	0.806301	0.624711	1.38887	1.50107	0.667241
YIL099W	SGA1		1.3875	0.26987	0.44358	0.62876	0.42372	0.15063		2.61625	1.2057	1.35997	1.54624	1.34138	1.11005
YFL033C	RIM15		1.387	-0.085872	0.17355	0.39322	0.81005	-0.33316		2.61534	0.942215	1.12783	1.31332	1.75327	0.793796
YDR424C	DYN2		1.3865	0.15649	0.70512	-0.025294	0.25035	-1.9132		2.61444	1.11457	1.63028	0.98262	1.1895	0.265503
YLL064C	PAU18		1.381	0.12988	-0.17623	0.37629	-0.31595	-0.72092		2.60449	1.0942	0.885013	1.298	0.803322	0.60671
YIL172C	IMA3		1.3807	0.66671	0.45395	0.01884	-0.17599	-1.02		2.60395	1.58745	1.36979	1.01314	0.88516	0.493116
YDL210W	UGA4		1.379	0.21057	0.061256	0.19598	0.36065	-0.70399		2.60088	1.15715	1.04337	1.1455	1.284	0.613872
YAL068C	PAU8		1.376	0.14706	-0.2124	0.29968	-0.18291	-0.34774		2.59548	1.10731	0.8631	1.23087	0.880924	0.785814
YGL121C	GPG1		1.3752	1.2556	2.0498	1.0732	0.5909	0.13608		2.59404	2.38766	4.14049	2.1041	1.50619	1.09892
YPR167C	MET16		1.3743	-0.42975	0.2783	0.18676	-1.0167	0.58611		2.59242	0.74239	1.21276	1.1382	0.494246	1.50119
YPL272C	PBI1		1.3734	0.49069	0.0239	0.9182	0.89165	-0.58465		2.5908	1.40512	1.0167	1.88976	1.8553	0.666811
YOR120W	GCY1		1.3733	1.0463	1.3045	1.4133	0.45938	0.2257		2.59062	2.06523	2.46998	2.66346	1.37495	1.16934
YGL006W-A			1.3727	0.39594	0.1467	0.57996	-0.02661	-0.37707		2.58955	1.3158	1.10703	1.49481	0.981724	0.77
YER175W-A			1.3697	0.10756	0.56033	0.57482	0.11569	-0.20384		2.58417	1.0774	1.47461	1.48949	1.08349	0.868237
YNR068C			1.3696	0.69579	0.24286	1.2776	-0.77317	-0.48837		2.58399	1.61977	1.18334	2.42435	0.58513	0.71283
YIR028W	DAL4		1.369	0.45691	-0.18841	0.56955	0.51084	-0.214		2.58291	1.3726	0.877572	1.48406	1.42488	0.862144
YLR411W	CTR3		1.3681	0.78234	0.52767	0.43065	1.8101	0.11776		2.5813	1.71992	1.4416	1.34784	3.50667	1.08505
YMR053C	STB2		1.3651	0.44856	0.22851	0.43971	-0.036515	-0.49194		2.57594	1.36468	1.17162	1.35633	0.975007	0.711068
YNR058W	BIO3		1.3644	0.61175	0.4647	0.61461	0.051265	-0.18801		2.57469	1.52811	1.38003	1.53114	1.03617	0.877816
YHL046C	PAU13		1.3627	0.1449	0.0073201	0.37032	0.16019	-0.36279		2.57166	1.10565	1.00509	1.29264	1.11743	0.777659
YGR225W	AMA1		1.3615	-0.091268	0.31556	1.0935	0.89966	-0.37252		2.56952	0.938697	1.24449	2.13391	1.86563	0.772432
YFL058W	THI5		1.361	0.18498	0.48443	1.0011	-0.28503	0.3507		2.56863	1.1368	1.39903	2.00153	0.820725	1.27518
YNL128W	TEP1		1.3598	0.39635	0.405	-0.17822	0.33588	-0.20764		2.5665	1.31617	1.32409	0.883793	1.26215	0.865953
YKL220C	FRE2		1.3585	0.46342	0.29253	0.55951	0.44194	-0.57065		2.56418	1.37881	1.22479	1.47377	1.35843	0.673313
YIL163C			1.3579	-0.05636	-0.034909	0.54483	0.1255	-0.48342		2.56312	0.961687	0.976093	1.45885	1.09089	0.71528
YGR202C	PCT1		1.3558	0.059597	1.0845	0.32652	-0.36682	-0.8621		2.55939	1.04217	2.12064	1.25398	0.77549	0.550151
YJL104W	PAM16		1.355	-0.27569	-0.21412	-0.51704	-0.87757	-1.1356		2.55797	0.826055	0.862072	0.698804	0.544283	0.455146
YPL264C			1.3527	0.12497	0.44893	0.46775	-0.77358	0.26225		2.5539	1.09049	1.36503	1.38295	0.584964	1.19935
YMR090W			1.3499	0.50799	0.7571	1.4	-0.37497	-1.1098		2.54894	1.42207	1.69009	2.63902	0.771121	0.463358
YJL106W	IME2		1.3476	0.0065326	-0.31208	0.068862	0.60485	-0.57192		2.54488	1.00454	0.80548	1.04889	1.52082	0.672721
YBR203W	COS111		1.3451	0.07046	0.032867	0.89681	0.31583	-0.020316		2.54048	1.05005	1.02304	1.86194	1.24473	0.986017
YJL223C	PAU1		1.3443	0.25929	-0.043887	0.48883	-0.14552	-0.23669		2.53907	1.19689	0.970038	1.40331	0.904053	0.84869
YHR021W-A	ECM12		1.3411	0.24417	1.0573	0.10205	1.2946	-1.5874		2.53344	1.18441	2.08103	1.0733	2.45309	0.332771
YHL015W-A			1.3399	0.02705	0.8788	0.87945	0.28571	NaN		2.53134	1.01893	1.83885	1.83967	1.21901	N/A
YOR227W	HER1		1.3396	0.26203	0.54234	0.62192	0.51181	-1.1884		2.53081	1.19916	1.45633	1.53892	1.42584	0.438789
YIL066C	RNR3		1.3395	-0.19267	0.11337	-0.46104	0.72147	-0.91879		2.53064	0.874985	1.08175	0.726462	1.64886	0.528952
YMR181C			1.3313	-0.4075	0.58201	0.24559	0.65638	-0.52654		2.51629	0.753929	1.49693	1.18558	1.57612	0.694218
YPR068C	HOS1		1.3292	0.26917	-0.36368	-0.095298	0.34253	-0.70265		2.51263	1.20511	0.77718	0.936079	1.26798	0.614443
YEL012W	UBC8		1.3287	0.5905	-0.15701	0.97889	-0.16631	-0.98115		2.51176	1.50577	0.896882	1.97095	0.891119	0.506576
YHR210C			1.3235	0.2186	0.17068	0.40956	0.60801	-0.48367		2.50273	1.1636	1.12559	1.32828	1.52416	0.715156
YCR099C			1.3232	-2.1095	0.52828	0.6609	-0.99816	0.035921		2.50221	0.231727	1.44221	1.58107	0.500638	1.02521
YML042W	CAT2		1.3209	0.22051	0.26605	0.031461	-0.055014	-0.55285		2.49822	1.16515	1.20251	1.02205	0.962585	0.681672
YKL187C	FAT3		1.3207	-0.16734	0.17712	0.092385	1.6522	-0.41366		2.49787	0.890483	1.13062	1.06613	3.14313	0.750716
YGR153W			1.3182	0.065192	0.20889	0.57775	0.91381	-0.60013		2.49355	1.04622	1.1558	1.49252	1.88401	0.659695
YIL102C			1.3162	-0.55215	-0.49335	0.2059	0.13318	-1.137		2.49009	0.682003	0.710374	1.15341	1.09671	0.454704
YGL251C	HFM1		1.315	0.042605	0.14831	-0.16848	0.12221	-0.28749		2.48802	1.02997	1.10827	0.88978	1.0884	0.819326
YKL103C	APE1		1.3094	0.72186	1.4306	0.94103	-0.15475	0.087476		2.47838	1.64931	2.69559	1.9199	0.898288	1.06251
YDR473C	PRP3		1.3086	-0.35901	-0.39723	-0.12634	-0.16851	-0.81845		2.47701	0.779699	0.759315	0.916153	0.889761	0.567051
YBR066C	NRG2		1.3072	0.29403	0.16071	0.40795	0.6336	-1.0845		2.47461	1.22606	1.11784	1.3268	1.55143	0.471556
YPR184W	GDB1		1.3046	1.0328	1.9065	1.4661	0.7705	1.1918		2.47015	2.04599	3.74898	2.76274	1.70586	2.28438
YLR164W	SHH4		1.304	0.24092	0.45917	0.91555	0.24027	-0.14861		2.46913	1.18175	1.37475	1.88629	1.18121	0.902119
YBR072W	HSP26		1.3035	1.7621	2.0629	2.5194	0.68285	-0.17504		2.46827	3.39191	4.17825	5.73344	1.60531	0.885743
YDR366C			1.3035	-0.58741	-0.78805	0.49622	1.2025	-1.2324		2.46827	0.665537	0.579126	1.41051	2.30138	0.425609
YJR152W	DAL5		1.3029	0.46134	-0.076635	0.90341	0.37417	-1.1583		2.46724	1.37682	0.948267	1.87048	1.29609	0.44804
YIL176C	PAU14		1.3015	0.11844	-0.1061	0.45429	-0.1571	-0.31503		2.46485	1.08556	0.929096	1.37011	0.896826	0.803834
YIR029W	DAL2		1.3012	0.388	-0.16725	0.58073	0.16981	-0.27478		2.46434	1.30858	0.890539	1.49561	1.12491	0.826576
YDR195W	REF2		1.2977	1.0737	0.33867	1.1742	1.1107	-0.58271		2.45837	2.10482	1.26459	2.25668	2.1595	0.667708
YIR021W-A			1.2958	1.8842	1.2887	1.4351	0.2889	0.27848		2.45513	3.69148	2.44308	2.70401	1.22171	1.21292
YGL184C	STR3		1.2957	-0.39331	-0.23833	0.046349	-0.48893	-0.63749		2.45496	0.761381	0.847726	1.03265	0.712553	0.64283
YDL234C	GYP7		1.2953	0.40439	0.75045	0.49991	0.12991	0.13264		2.45428	1.32353	1.68232	1.41413	1.09423	1.0963
YPR196W			1.2948	0.22669	0.40448	0.41652	0.59131	-0.73902		2.45343	1.17015	1.32361	1.3347	1.50661	0.599146
YNR076W	PAU6		1.2903	0.34734	-0.022115	0.6647	-0.93539	-0.67872		2.44579	1.27221	0.984788	1.58524	0.522901	0.624719
YHL047C	ARN2		1.2876	0.4068	0.47403	0.20998	0.28014	-0.77953		2.44122	1.32574	1.38898	1.15667	1.21431	0.582557
YMR325W	PAU19		1.2869	-0.099825	0.057526	0.70565	-0.44993	-0.89376		2.44003	0.933146	1.04068	1.63088	0.732078	0.53821
YJL027C			1.2855	0.14851	0.42042	0.88189	0.81276	-0.091538		2.43767	1.10842	1.33832	1.84279	1.75657	0.938522
YGL205W	POX1		1.2838	0.71267	0.81857	-0.23118	-0.41512	-0.88504		2.43479	1.63883	1.76366	0.851938	0.749957	0.541473
YCR104W	PAU3		1.2794	0.12689	-0.084562	0.63677	-0.69124	-0.91777		2.42738	1.09194	0.943071	1.55484	0.619321	0.529327
YGR122W			1.2759	0.14263	-0.34029	0.040799	-0.35023	-1.2244		2.4215	1.10392	0.789883	1.02868	0.784459	0.427975
YLR343W	GAS2		1.2758	0.18195	-0.11194	1.1158	0.34448	2.8166		2.42133	1.13442	0.925343	2.16715	1.26969	7.045
YER179W	DMC1		1.2738	-0.030641	-0.18687	-0.83781	0.060292	-1.3149		2.41798	0.978985	0.87851	0.559492	1.04268	0.401953
YNL042W	BOP3		1.2727	0.47255	0.15012	0.12926	0.37993	0.33283		2.41613	1.38756	1.10966	1.09373	1.30128	1.25948
YOL098C			1.2672	-0.4244	0.22647	-0.02387	-0.079608	-1.2518		2.40694	0.745149	1.16997	0.983591	0.946315	0.419924
YIL017C	VID28		1.2658	0.22899	-0.14354	0.44251	0.35872	-0.86989		2.40461	1.17201	0.905295	1.35897	1.28229	0.547189
YJL163C			1.2658	0.46319	0.10104	0.42085	0.19065	-0.60627		2.40461	1.37859	1.07255	1.33872	1.14128	0.656893
YNR014W			1.2657	-0.01508	0.15997	-0.15969	1.4263	-0.097058		2.40444	0.989602	1.11726	0.895217	2.68757	0.934938
YNL036W	NCE103		1.2615	0.45435	0.52406	0.55525	-0.32478	-0.1697		2.39745	1.37017	1.438	1.46942	0.79842	0.889028
YPR013C	CMR3		1.2615	-0.042772	-0.12151	-0.05021	0.3925	-0.92546		2.39745	0.970788	0.919225	0.965796	1.31267	0.526513
YAL028W	FRT2		1.26	0.43373	0.30541	0.63874	0.82423	-0.92236		2.39496	1.35072	1.23577	1.55697	1.77059	0.527645
YMR182C	RGM1		1.259	-0.31465	0.83989	-0.52266	0.62377	-0.56425		2.3933	0.804046	1.78991	0.696087	1.5409	0.676307
YER188C-A			1.2584	0.29593	-0.094875	-0.29783	-0.93287	-0.95111		2.3923	1.22768	0.936353	0.813475	0.523815	0.517234
YIR017C	MET28		1.2555	0.056156	0.47556	0.16584	-0.83363	-0.97107		2.3875	1.03969	1.39046	1.12182	0.561116	0.510128
YNL063W	MTQ1		1.2525	0.3394	0.35913	1.0672	0.4402	-0.99676		2.38254	1.26523	1.28265	2.09536	1.35679	0.501124
YFR020W			1.249	-0.066034	0.51352	0.24865	0.47743	-0.95676		2.37677	0.95526	1.42753	1.18809	1.39226	0.515213
YJL216C	IMA5		1.2483	0.34856	0.34704	0.46057	0.36663	-0.59677		2.37561	1.27329	1.27195	1.37609	1.28934	0.661233
YPR002W	PDH1		1.2456	1.9266	0.8768	1.443	0.78146	-0.45431		2.37117	3.80158	1.8363	2.71886	1.71887	0.729859
YDR285W	ZIP1		1.2449	0.27927	-0.017088	0.41875	-0.91811	-0.81192		2.37002	1.21358	0.988225	1.33677	0.529202	0.569623
YPR005C	HAL1		1.2377	-0.28675	0.3169	0.39868	0.53415	-0.54253		2.35822	0.819747	1.24565	1.3183	1.44809	0.686566
YKL178C	STE3		1.2371	-1.0924	-0.27246	-0.47746	0.92235	-0.59031		2.35724	0.468981	0.827907	0.718241	1.8952	0.6642
YPL075W	GCR1		1.2317	0.63514	0.5356	0.61789	-0.15209	-1.1784		2.34844	1.55309	1.44954	1.53463	0.899946	0.441841
YER014C-A	BUD25		1.2312	0.32159	-0.24559	0.81707	-0.052488	-0.97751		2.34762	1.24971	0.843471	1.76182	0.964272	0.507856
YGL156W	AMS1		1.2306	0.37944	0.59624	0.88964	0.15581	-0.25727		2.34665	1.30084	1.51177	1.85271	1.11405	0.83667
YOR003W	YSP3		1.2303	0.27877	0.58291	0.54723	0.49918	-0.49081		2.34616	1.21316	1.49787	1.46128	1.41341	0.711625
YOL154W	ZPS1		1.2299	1.2359	2.3367	1.4698	1.2019	-0.3854		2.34551	2.35528	5.05146	2.76983	2.30042	0.765567
YOR032C	HMS1		1.2297	-0.56096	-0.38074	0.39392	1.2315	-0.55336		2.34518	0.677851	0.768044	1.31396	2.34811	0.681431
YKR104W			1.2286	0.86609	0.74037	0.40754	1.0491	-0.60167		2.34339	1.82272	1.6706	1.32642	2.06924	0.658991
YER053C	PIC2		1.2281	0.36446	0.22872	0.54863	0.16255	0.18171		2.34258	1.2874	1.17179	1.4627	1.11926	1.13423
YKL224C	PAU16		1.2273	0.29876	-0.17195	0.66518	-0.013691	-0.63633		2.34128	1.23009	0.887642	1.58577	0.990555	0.643347
YHR213W-A			1.2272	0.34289	0.74205	0.81298	1.3449	0.27181		2.34112	1.26829	1.67255	1.75684	2.54013	1.20732
YHR138C			1.2268	0.026245	-0.12809	0.63018	1.0467	-0.58649		2.34047	1.01836	0.915042	1.54776	2.0658	0.665961
YBR184W			1.2225	0.043199	-0.45204	0.19126	0.59474	-0.77426		2.33351	1.0304	0.731008	1.14176	1.5102	0.584688
YER158C			1.2205	-0.020142	0.41332	0.21617	0.83092	-0.5085		2.33027	0.986136	1.33175	1.16165	1.77882	0.702953
YFR026C	ULI1		1.2194	0.039733	0.41804	0.75276	0.90344	-0.88486		2.3285	1.02792	1.33611	1.68501	1.87052	0.54154
YDR218C	SPR28		1.2189	0.68637	-0.25258	1.3508	1.9405	0.41982		2.32769	1.60923	0.839394	2.55054	3.83839	1.33776
YPL241C	CIN2		1.2172	0.018834	0.55277	0.44276	0.32343	-0.12493		2.32495	1.01314	1.4669	1.3592	1.2513	0.917049
YDR425W	SNX41		1.2156	0.28773	0.51525	0.20296	-0.32092	-0.97572		2.32237	1.22072	1.42924	1.15106	0.800559	0.508486
YFR022W	ROG3		1.2144	0.37205	0.44809	0.71132	0.67772	0.21885		2.32044	1.29419	1.36423	1.6373	1.59961	1.16381
YBR298C	MAL31		1.2142	-0.068408	-0.38555	0.032029	0.93192	-0.9401		2.32012	0.95369	0.765487	1.02245	1.90781	0.521197
YCR100C			1.2127	-1.8443	0.71624	0.67466	-1.0101	0.5531		2.31771	0.27849	1.64289	1.59622	0.496512	1.46724
YJL132W			1.2116	0.51325	0.79557	1.3191	0.34597	-0.45489		2.31594	1.42726	1.73576	2.4951	1.27101	0.729566
YHR184W	SSP1		1.2085	0.22277	-0.20588	-0.35312	-0.25936	0.12191		2.31097	1.16697	0.86701	0.782889	0.835458	1.08817
YGR070W	ROM1		1.2072	0.4287	0.39271	0.75112	0.094926	-0.67398		2.30889	1.34602	1.31286	1.6831	1.06801	0.626775
YNR077C			1.2071	-0.1394	-0.5069	-0.52235	-0.42708	-1.0514		2.30873	0.907897	0.703733	0.696237	0.743766	0.4825
YBR085W	AAC3		1.2037	-0.10965	0.2995	-0.58893	0.74561	-2.3583		2.3033	0.926813	1.23072	0.664836	1.67668	0.195021
YJR149W			1.2025	0.12935	0.81465	1.5272	0.64738	0.25215		2.30138	1.0938	1.75887	2.88226	1.56632	1.19098
YCR108C			1.2001	0.24268	-0.50682	-0.42156	-0.79534	-1.3839		2.29756	1.18319	0.703772	0.746617	0.576207	0.383182
YPR098C			1.1975	0.081409	0.11991	0.48536	0.81078	-1.4054		2.29342	1.05805	1.08667	1.39994	1.75416	0.377513
YOL128C	YGK3		1.197	-0.47827	-0.37045	0.23329	1.0875	-1.5874		2.29262	0.717838	0.773541	1.17551	2.12505	0.332771
YDR009W	GAL3		1.1968	0.21899	-0.18009	-0.14456	-0.20382	-0.43735		2.29231	1.16392	0.882648	0.904655	0.868249	0.73849
YCL026C-B	HBN1		1.1965	0.041917	-0.24928	1.9512	-0.0032764	-1.5393		2.29183	1.02948	0.841316	3.86696	0.997732	0.344052
YDL169C	UGX2		1.1962	0.59183	0.32084	0.19118	-0.042579	-0.66525		2.29135	1.50716	1.24906	1.1417	0.970918	0.630579
YDL154W	MSH5		1.1961	0.82936	0.98745	1.4504	-0.16753	-0.22338		2.29119	1.7769	1.98268	2.73284	0.890366	0.856556
YFL061W	DDI2		1.1956	0.077758	0.076547	0.67036	-0.11306	-0.63095		2.2904	1.05538	1.05449	1.59147	0.924625	0.645751
YPL119C	DBP1		1.1943	0.67446	0.48482	-0.034771	0.23039	-0.78042		2.28834	1.596	1.39941	0.976187	1.17315	0.582197
YDR506C	GMC1		1.1938	0.55336	-0.18423	-0.70876	0.11135	-0.49418		2.28754	1.4675	0.880119	0.611846	1.08024	0.709965
YHR033W			1.1927	-0.102	-0.27064	1.0889	0.90834	0.1324		2.2858	0.93174	0.828952	2.12712	1.87688	1.09612
YMR034C			1.1902	-0.017379	-0.22814	0.78822	1.4173	-0.90466		2.28184	0.988026	0.853735	1.72694	2.67085	0.534159
YIL089W			1.1849	0.44487	0.62394	0.68309	-0.017363	-0.95446		2.27348	1.36119	1.54108	1.60557	0.988037	0.516035
YKL064W	MNR2		1.1829	0.83817	0.0013786	1.3703	0.55346	-0.33033		2.27033	1.78778	1.00096	2.58524	1.4676	0.795355
YKL005C	BYE1		1.1828	0.38289	0.22952	0.59808	1.0546	-0.57212		2.27017	1.30395	1.17244	1.5137	2.07714	0.672628
YMR158C-A			1.1827	-0.10914	-0.41982	NaN	-0.31213	-0.633		2.27001	0.927141	0.747518	N/A	0.805452	0.644834
YBR270C	BIT2		1.1821	0.41209	-0.085427	0.34502	0.46879	-0.86698		2.26907	1.33061	0.942506	1.27017	1.38395	0.548293
YHR044C	DOG1		1.1796	-0.21684	0.12135	0.60666	0.64602	-1.2077		2.26514	0.860448	1.08775	1.52273	1.56485	0.432958
YPR152C	URN1		1.1794	0.29253	-0.17785	0.017733	0.22965	-0.47577		2.26483	1.22479	0.884019	1.01237	1.17255	0.719083
YAL062W	GDH3		1.179	-0.12544	0.64652	-0.0043697	1.8104	-0.81295		2.2642	0.916724	1.56539	0.996976	3.5074	0.569217
YGR224W	AZR1		1.179	-0.0031467	0.12799	0.44538	0.61635	-0.73721		2.2642	0.997821	1.09277	1.36167	1.53299	0.599898
YDR114C			1.1742	-0.20253	-0.65734	0.0054546	1.255	-1.339		2.25668	0.869025	0.634046	1.00379	2.38667	0.395295
YBR208C	DUR1,2		1.1738	0.46892	-0.29007	0.098824	0.75495	0.33055		2.25605	1.38407	0.817862	1.0709	1.68757	1.25749
YJL127C	SPT10		1.1735	0.239	1.7765	0.22696	0.090035	-0.53795		2.25558	1.18017	3.42594	1.17037	1.0644	0.688749
YGL158W	RCK1		1.1689	0.6347	1.1695	0.43009	2.0641	0.20607		2.2484	1.55261	2.24934	1.34732	4.18173	1.15354
YNL240C	NAR1		1.168	-0.70362	0.92761	-0.46822	0.29114	-0.6297		2.247	0.61403	1.90212	0.722856	1.22361	0.646311
YPL258C	THI21		1.1662	0.29083	0.083618	0.50827	1.1442	0.23242		2.2442	1.22334	1.05967	1.42234	2.21024	1.1748
YFL054C			1.1641	-0.062532	-0.37942	-0.067193	0.5251	-0.76638		2.24093	0.957582	0.768747	0.954493	1.43903	0.587891
YER162C	RAD4		1.1624	1.3408	1.3687	0.40181	0.1939	-0.34001		2.23829	2.53292	2.58238	1.32116	1.14385	0.790036
YNR070W	PDR18		1.1623	0.40623	0.32423	-0.031099	0.1366	-0.64742		2.23814	1.32522	1.252	0.978674	1.09931	0.638421
YNL325C	FIG4		1.1622	-0.19139	-0.43895	-0.16725	-0.14097	-0.78523		2.23798	0.875762	0.737671	0.890539	0.906909	0.580259
YLR271W			1.162	0.07496	-0.22457	0.46759	-0.36137	-0.89965		2.23767	1.05333	0.85585	1.3828	0.778425	0.536017
YNL143C			1.1616	0.75259	0.48143	0.33345	1.387	0.46992		2.23705	1.68481	1.39613	1.26002	2.61534	1.38503
YNL146C-A			1.1611	-0.049714	-1.0294	-0.1258	1.0638	-0.28856		2.23628	0.966128	0.489914	0.916496	2.09043	0.818719
YGL096W	TOS8		1.1603	0.51234	0.088003	1.4761	0.63961	-0.3696		2.23504	1.42636	1.0629	2.78196	1.55791	0.773997
YER039C-A			1.1581	0.30378	0.22938	0.57226	0.49313	-0.91819		2.23163	1.23437	1.17233	1.48685	1.4075	0.529173
YNR075W	COS10		1.1546	-0.21123	0.1766	0.35818	-1.8598	-0.23511		2.22623	0.8638	1.13022	1.28181	0.275514	0.84962
YDL104C	QRI7		1.1525	0.4203	0.62507	0.18894	-0.2076	-0.88267		2.22299	1.33821	1.54229	1.13993	0.865977	0.542363
YMR114C			1.1508	0.21531	-0.061176	0.13916	0.039016	-0.64165		2.22037	1.16095	0.958483	1.10126	1.02741	0.640979
YDR020C	DAS2		1.1496	-0.061879	0.3868	-0.094942	0.22543	-1.0914		2.21852	0.958016	1.30749	0.93631	1.16913	0.469306
YKL163W	PIR3		1.1479	0.75681	1.7532	1.2225	1.5895	1.2393		2.21591	1.68975	3.37105	2.33351	3.00945	2.36084
YPR201W	ARR3		1.1467	0.37299	0.07134	-0.45035	-0.38398	-0.57598		2.21407	1.29503	1.05069	0.731865	0.766321	0.67083
YGR087C	PDC6		1.1457	0.064322	0.74069	0.19171	0.4523	-0.51973		2.21253	1.04559	1.67097	1.14212	1.36822	0.697502
YLR308W	CDA2		1.1444	NaN	-0.16448	0.42949	0.37161	0.45155		2.21054	N/A	0.89225	1.34676	1.2938	1.36751
YJR119C	JHD2		1.1407	0.15261	0.089839	0.064859	0.21296	-0.53767		2.20488	1.11158	1.06425	1.04598	1.15906	0.688883
YLR035C	MLH2		1.1405	0.076824	0.08949	0.16565	0.064605	-0.20916		2.20457	1.05469	1.06399	1.12167	1.0458	0.865041
YPL038W-A			1.14	NaN	0.58896	0.28291	0.50383	NaN		2.20381	N/A	1.50416	1.21665	1.41797	N/A
YLR037C	PAU23		1.1397	0.39631	0.16518	1.0444	0.81725	-0.97255		2.20335	1.31614	1.12131	2.06251	1.76204	0.509605
YHL044W			1.138	0.3413	0.62692	0.84897	-1.0537	-0.51559		2.20076	1.2669	1.54426	1.80121	0.481731	0.699507
YEL067C			1.1344	0.075732	0.017908	0.29024	0.69499	-0.62825		2.19527	1.0539	1.01249	1.22284	1.61887	0.646961
YIL120W	QDR1		1.1321	-0.11678	0.075785	0.1964	0.35545	-1.0908		2.19178	0.922244	1.05393	1.14584	1.27938	0.469501
YIR041W	PAU15		1.1316	0.27019	0.27487	0.80531	-0.13256	-0.56084		2.19102	1.20597	1.20989	1.74752	0.912211	0.677907
YDL199C			1.1314	0.23464	-0.17843	0.52457	0.5549	-0.3724		2.19071	1.17661	0.883664	1.4385	1.46907	0.772496
YIR018C-A			1.1314	0.21945	-0.15424	0.74423	0.016376	-1.0105		2.19071	1.16429	0.898606	1.67508	1.01142	0.496374
YPL165C	SET6		1.1296	0.32228	0.26132	0.7317	-0.076641	-0.71095		2.18798	1.2503	1.19857	1.66059	0.948263	0.610918
YEL041W	YEF1		1.1274	0.39201	0.016444	0.67293	0.7238	-0.70671		2.18465	1.31222	1.01146	1.59431	1.65153	0.612716
YGR197C	SNG1		1.1257	-0.31549	0.15816	1.5305	0.73531	-0.039407		2.18207	0.803578	1.11586	2.88886	1.66476	0.973055
YJR108W	ABM1		1.1257	0.47273	0.25724	-0.024712	0.74097	-0.57705		2.18207	1.38773	1.19519	0.983017	1.6713	0.670333
YAL063C	FLO9		1.1246	0.53703	0.24716	0.55719	2.4096	-0.40655		2.18041	1.45098	1.18687	1.4714	5.31327	0.754425
YHR166C	CDC23		1.1239	0.038505	0.076428	0.086438	0.3658	-0.40991		2.17935	1.02705	1.0544	1.06175	1.2886	0.75267
YBR167C	POP7		1.1224	-0.7718	0.14021	-0.20723	0.52038	-1.906		2.17709	0.585686	1.10207	0.866199	1.43433	0.266831
YNL092W			1.1221	0.49345	0.34529	0.13763	0.37415	-0.85806		2.17664	1.40781	1.27041	1.1001	1.29608	0.551694
YDR323C	PEP7		1.1215	0.083937	0.56936	0.40334	0.42985	-0.52741		2.17573	1.05991	1.48387	1.32257	1.34709	0.693799
YEL065W	SIT1		1.1211	1.6571	0.38267	0.0053365	2.0616	-1.5374		2.17513	3.15382	1.30375	1.00371	4.17449	0.344506
YLR031W			1.1198	0.093938	-0.038871	0.65157	0.92231	-0.37813		2.17317	1.06728	0.973416	1.57088	1.89515	0.769434
YJL102W	MEF2		1.1194	0.73177	-0.098728	0.8475	-0.60237	-0.77365		2.17257	1.66068	0.933856	1.79938	0.658671	0.584936
YDL009C			1.1193	0.45596	-0.11864	1.5104	0.74837	-1.5671		2.17242	1.3717	0.921056	2.84889	1.67989	0.337486
YMR030W	RSF1		1.1193	0.29385	-0.25364	0.41437	-0.33728	-0.84169		2.17242	1.22591	0.838777	1.33272	0.791532	0.55799
YBR163W	EXO5		1.1182	0.25196	0.02248	0.50523	0.72111	-1.4506		2.17076	1.19082	1.0157	1.41935	1.64845	0.365869
YCL027W	FUS1		1.1179	-0.78551	-0.19332	1.0058	0.44907	0.79503		2.17031	0.580147	0.874591	2.00806	1.36516	1.73511
YPL036W	PMA2		1.1176	0.51331	0.50202	1.2147	0.69972	0.17715		2.16986	1.42732	1.4162	2.32093	1.62419	1.13065
YLR352W			1.1173	0.47269	0.4405	0.31132	0.30706	-1.0039		2.16941	1.38769	1.35707	1.24084	1.23718	0.49865
YPR093C	ASR1		1.116	0.18254	1.3765	-0.41068	0.099933	-1.1606		2.16745	1.13488	2.59638	0.752269	1.07172	0.447326
YLR445W	GMC2		1.1155	0.41359	0.23534	1.3221	0.72211	-0.59297		2.1667	1.332	1.17718	2.5003	1.64959	0.662977
YGR154C	GTO1		1.1153	0.53993	0.49228	0.82034	0.53171	-0.97394		2.1664	1.4539	1.40667	1.76582	1.44564	0.509114
YJR012C			1.1133	-0.73852	-0.51392	0.052869	0.36002	-1.1836		2.1634	0.599354	0.700317	1.03733	1.28344	0.440252
YOR020W-A			1.113	0.96273	0.49352	0.47599	0.14596	-1.0779		2.16295	1.94899	1.40788	1.39087	1.10647	0.473718
YMR175W-A			1.1129	-0.10451	0.087935	-0.26507	0.69219	-0.53457		2.1628	0.930121	1.06285	0.832158	1.61573	0.690364
YOL043C	NTG2		1.1125	-0.10843	-0.26314	0.21053	0.135	-0.73846		2.1622	0.927597	0.833272	1.15711	1.09809	0.599379
YDL223C	HBT1		1.1124	0.57639	1.4511	0.49828	1.7546	1.0968		2.16205	1.49111	2.73416	1.41253	3.37433	2.1388
YKR005C			1.1123	0.75729	0.9767	-0.010973	0.46057	-0.11004		2.1619	1.69031	1.96796	0.992423	1.37609	0.926562
YMR159C	ATG16		1.1119	0.21032	0.10429	0.34964	-0.29166	-1.1		2.1613	1.15694	1.07497	1.27424	0.816962	0.466516
YER187W			1.1102	0.64143	0.15404	-0.73814	-1.4228	-0.26282		2.15876	1.55987	1.11268	0.599512	0.372988	0.833457
YML054C-A			1.1093	0.82477	1.1508	1.9991	0.55141	-0.32258		2.15741	1.77125	2.22037	3.99751	1.46552	0.799639
YDR336W	MRX8		1.1076	-0.29031	-0.12955	0.60111	-0.38543	-0.31669		2.15487	0.817726	0.914117	1.51688	0.765551	0.80291
YNL146W			1.1064	-0.43757	-0.32359	-0.26314	0.46139	-1.0599		2.15308	0.738377	0.799079	0.833272	1.37687	0.479665
YLR213C	CRR1		1.1062	-0.0075135	0.0081785	0.68769	0.45893	-1.7823		2.15278	0.994806	1.00569	1.6107	1.37452	0.29072
YNL180C	RHO5		1.1044	-0.046714	-0.02164	-0.49386	-0.3719	-0.43611		2.15009	0.968139	0.985112	0.710123	0.772764	0.739125
YER065C	ICL1		1.1035	0.23126	0.53449	0.13968	0.74746	-0.98732		2.14875	1.17386	1.44843	1.10166	1.67883	0.504414
YMR105W-A			1.1034	0.63125	2.5888	0.64556	0.25689	-0.28794		2.1486	1.54891	6.01598	1.56435	1.1949	0.819071
YMR316W	DIA1		1.1027	-0.11189	0.079638	0.82236	0.95736	-0.55403		2.14756	0.925375	1.05675	1.7683	1.94175	0.681115
YHR014W	SPO13		1.1019	-0.47746	-0.20228	0.35694	1.1099	0.2315		2.14637	0.718241	0.869176	1.28071	2.15831	1.17406
YDR523C	SPS1		1.1013	0.32053	-0.79716	-0.40382	0.45682	-0.53197		2.14548	1.24879	0.575481	0.755854	1.37251	0.69161
YNL335W	DDI3		1.099	0.093245	0.19673	0.68956	-0.089152	-0.77233		2.14206	1.06677	1.1461	1.61279	0.940075	0.585471
YLR178C	TFS1		1.0982	0.041251	0.61724	0.4337	0.93895	-1.4533		2.14087	1.02901	1.53394	1.35069	1.91713	0.365185
YLL025W	PAU17		1.0975	0.39046	0.04288	0.69748	0.19116	-0.99037		2.13984	1.31081	1.03017	1.62167	1.14168	0.503349
YJL049W			1.096	-0.05139	-0.22645	0.41548	-0.31951	-0.60769		2.13761	0.965006	0.854736	1.33374	0.801342	0.656247
YKL183C-A			1.094	NaN	1.0862	NaN	-0.8055	-0.45691		2.13465	N/A	2.12314	N/A	0.572164	0.728545
YOR059C	LPL1		1.0917	0.39603	-0.26194	0.17777	0.18053	-0.7051		2.13125	1.31588	0.833966	1.13113	1.1333	0.6134
YLR408C	BLS1		1.0903	0.97622	0.62956	0.78449	0.34179	-0.67568		2.12918	1.9673	1.54709	1.72248	1.26733	0.626037
YOR381W	FRE3		1.0903	0.23906	-0.041715	0.78469	0.37805	-0.94464		2.12918	1.18022	0.971499	1.72272	1.29958	0.519559
YJR151C	DAN4		1.0893	-0.26473	-0.23677	0.17646	0.048816	-0.48639		2.12771	0.832354	0.848643	1.13011	1.03442	0.713809
YDL036C	PUS9		1.0874	0.25787	0.22997	-0.20429	0.27183	-0.71542		2.12491	1.19571	1.17281	0.867966	1.20734	0.609028
YGR067C			1.0868	-0.0074531	-0.83834	-0.34333	-0.18949	-0.42517		2.12402	0.994847	0.559287	0.78822	0.876916	0.744751
YKL188C	PXA2		1.0866	0.37155	0.073157	0.31957	-0.21523	0.12622		2.12373	1.29374	1.05202	1.24796	0.861409	1.09143
YMR105C	PGM2		1.0854	1.3355	2.5884	0.71238	0.62785	-0.022146		2.12196	2.52363	6.01431	1.6385	1.54526	0.984767
YOR107W	RGS2		1.0854	-0.28036	-0.37413	-0.22216	0.56129	-0.24143		2.12196	0.823386	0.771571	0.857281	1.47559	0.845906
YAR020C	PAU7		1.0836	0.23471	-0.24182	0.40287	0.95079	-0.26259		2.11932	1.17667	0.845678	1.32214	1.93293	0.83359
YGR174C	CBP4		1.0831	0.33205	0.50661	0.45017	0.89639	0.10023		2.11858	1.2588	1.42071	1.3662	1.8614	1.07194
YCR105W	ADH7		1.0821	-3.595	-0.49646	-1.052	-2.1203	-0.73343		2.11712	0.0827556	0.708844	0.482299	0.229999	0.601472
YDL218W			1.0818	-0.10508	0.040164	0.10082	0.64014	-0.82856		2.11668	0.929753	1.02823	1.07238	1.55848	0.563091
YPR081C	GRS2		1.0807	0.22116	-0.0494	-0.23941	0.10362	-1.3679		2.11506	1.16567	0.966338	0.847092	1.07447	0.387455
YER139C	RTR1		1.0806	0.60226	0.96502	-0.29539	0.086181	-0.53386		2.11492	1.51809	1.95209	0.814852	1.06156	0.690704
YMR133W	REC114		1.0801	-0.25396	0.3316	0.44981	0.86977	-0.04512		2.11418	0.838591	1.25841	1.36586	1.82737	0.969209
YBR045C	GIP1		1.0784	0.64002	0.5303	0.72787	-0.046831	-0.47114		2.11169	1.55835	1.44423	1.65619	0.96806	0.721394
YJL038C	LOH1		1.0764	-0.12111	-0.092292	1.1057	0.44188	-0.42984		2.10877	0.91948	0.938031	2.15203	1.35837	0.742344
YPR160W	GPH1		1.0764	0.67146	2.1482	0.37919	1.0084	1.4016		2.10877	1.59268	4.43274	1.30061	2.01168	2.64194
YJR083C	ACF4		1.0759	-0.055626	-0.56789	-0.076119	-0.081478	-0.76195		2.10804	0.962177	0.674603	0.948606	0.945089	0.589699
YDR253C	MET32		1.0744	0.47291	0.095372	0.32096	1.0482	-1.6834		2.10585	1.38791	1.06834	1.24916	2.06795	0.311348
YHR035W	NEL1		1.0744	0.27171	0.27804	0.41036	0.044472	-0.63678		2.10585	1.20724	1.21255	1.32902	1.03131	0.643147
YCR098C	GIT1		1.0742	-1.5589	-0.24139	0.4107	-0.83426	-1.5133		2.10555	0.33941	0.84593	1.32933	0.560871	0.350309
YOR376W-A			1.074	0.098802	-0.22935	0.46231	0.17589	-0.70351		2.10526	1.07088	0.853019	1.37775	1.12966	0.614076
YPL278C			1.0733	-0.33504	-0.41197	2.4558	0.50139	-0.53969		2.10424	0.792762	0.751596	5.48617	1.41558	0.687919
YOR044W	IRC23		1.0726	-0.15089	-0.023811	0.3019	-0.17478	-0.35025		2.10322	0.900695	0.983631	1.23277	0.885903	0.784448
YLR246W	ERF2		1.0688	0.12596	0.19634	0.35507	-0.063008	-1.1979		2.09769	1.09123	1.14579	1.27905	0.957266	0.435909
YHR177W			1.0677	0.38271	0.13744	0.51909	-0.19479	0.010648		2.09609	1.30379	1.09995	1.43305	0.8737	1.00741
YMR059W	SEN15		1.0659	-0.21895	-0.49274	-0.024134	-0.14561	-0.99307		2.09348	0.859191	0.710674	0.983411	0.903997	0.502408
YCL039W	GID7		1.0658	0.053971	0.10708	1.0847	-0.012	-1.1832		2.09333	1.03812	1.07705	2.12093	0.991717	0.440374
YLR227C	ADY4		1.0655	0.2004	0.19429	0.28888	0.46785	-1.4923		2.0929	1.14902	1.14416	1.22169	1.38305	0.355445
YOL162W			1.0642	0.12447	0.28029	1.1987	-0.16391	-0.65295		2.09101	1.09011	1.21444	2.29533	0.892603	0.635979
YOR183W	FYV12		1.0602	0.26334	0.37716	0.31299	0.63985	-0.045813		2.08522	1.20025	1.29878	1.24228	1.55817	0.968744
YIL136W	OM45		1.0584	0.92203	0.37598	0.68971	-0.11903	0.15079		2.08262	1.89478	1.29772	1.61296	0.920807	1.11018
YCL021W-A			1.058	-0.28291	-0.53164	1.4696	-0.074208	-0.83874		2.08204	0.821931	0.691768	2.76945	0.949863	0.559132
YOL097W-A			1.0578	0.15867	0.39971	1.1815	1.1941	-0.71797		2.08175	1.11626	1.31924	2.26812	2.28802	0.607952
YGR008C	STF2		1.0563	-0.29934	-0.61957	0.4081	0.42945	-1.3476		2.07959	0.812624	0.650865	1.32694	1.34672	0.392945
YDR125C	ECM18		1.056	-0.45689	-0.30779	-0.12983	0.41923	-0.86143		2.07916	0.728555	0.807878	0.913939	1.33721	0.550407
YNL019C			1.056	-0.016178	-0.50341	0.18571	0.51295	-0.14938		2.07916	0.988849	0.705437	1.13738	1.42697	0.901638
YER078C	ICP55		1.0559	0.084353	0.12299	0.32146	0.23167	-0.67875		2.07901	1.06021	1.08899	1.24959	1.17419	0.624706
YGR058W	PEF1		1.0543	-0.25444	-0.30717	-0.1616	-0.12709	-0.91746		2.07671	0.838312	0.808226	0.894033	0.915677	0.52944
YER037W	PHM8		1.0521	0.48649	0.077734	1.2422	0.23526	0.40534		2.07355	1.40103	1.05536	2.36559	1.17712	1.3244
YJL156C	SSY5		1.0504	-0.040427	-0.22637	0.30982	0.40048	-0.44601		2.0711	0.972367	0.854783	1.23955	1.31995	0.73407
YDL247W	MPH2		1.0501	0.38082	0.49751	0.64478	0.33399	0.080058		2.07067	1.30208	1.41177	1.5635	1.26049	1.05706
YDL139C	SCM3		1.0496	-0.015531	0.13454	0.3305	-0.0023606	-0.5405		2.06996	0.989292	1.09774	1.25745	0.998365	0.687533
YNR004W	SWM2		1.0495	-0.12852	-0.03	0.35581	0.54411	-0.64993		2.06981	0.914769	0.97942	1.2797	1.45812	0.637311
YPL072W	UBP16		1.0493	0.37743	0.15122	0.7627	-0.065889	-0.60394		2.06953	1.29903	1.11051	1.69666	0.955356	0.657955
YJR160C	MPH3		1.0486	0.55532	0.66944	0.61457	0.27991	0.16049		2.06852	1.46949	1.59046	1.5311	1.21412	1.11767
YJL170C	ASG7		1.0482	1.7082	2.1143	1.1768	0.23988	-0.33527		2.06795	3.26753	4.3298	2.26075	1.18089	0.792636
YPL147W	PXA1		1.0478	0.42103	-0.11031	0.68022	-0.22912	-1.0224		2.06737	1.33888	0.926389	1.60238	0.853155	0.492297
YAL064C-A	TDA8		1.0477	0.65873	0.2186	0.50692	1.2752	-0.37354		2.06723	1.57869	1.1636	1.42101	2.42032	0.771886
YBR044C	TCM62		1.0473	0.33642	0.29747	0.11926	-0.19169	-0.12167		2.06666	1.26262	1.22899	1.08618	0.875579	0.919123
YDR111C	ALT2		1.0467	0.18203	-0.046071	-0.66413	1.212	-0.73782		2.0658	1.13448	0.968571	0.631069	2.31659	0.599645
YNL195C			1.0458	-0.29182	-0.34066	-0.16072	0.82047	-0.7756		2.06451	0.816871	0.78968	0.894579	1.76598	0.584146
YIL013C	PDR11		1.0452	0.52105	0.38638	0.20075	0.24089	0.056047		2.06365	1.435	1.30711	1.1493	1.18172	1.03961
YEL060C	PRB1		1.0447	0.068377	0.77224	1.8329	0.38693	-0.56857		2.06294	1.04854	1.70792	3.56252	1.30761	0.674285
YBL075C	SSA3		1.0444	0.56974	1.5627	0.71576	0.55858	-0.1318		2.06251	1.48426	2.95406	1.64235	1.47282	0.912692
YPR121W	THI22		1.0429	0.42265	-0.026914	0.4479	0.50633	-0.44526		2.06037	1.34039	0.981518	1.36405	1.42043	0.734452
YML015C	TAF11		1.0424	-0.19446	1.1259	0.76231	0.054712	-0.96982		2.05965	0.8739	2.18238	1.6962	1.03865	0.51057
YCR091W	KIN82		1.042	0.44566	-0.21556	0.95392	-0.4873	-0.39003		2.05908	1.36194	0.861212	1.93713	0.713359	0.763114
YPR151C	SUE1		1.0413	0.2269	0.64607	0.35107	0.51635	-0.26881		2.05808	1.17032	1.5649	1.27551	1.43033	0.830004
YKR069W	MET1		1.04	0.39633	-0.020627	0.6355	-0.19385	-0.35472		2.05623	1.31616	0.985804	1.55348	0.87427	0.782021
YJR155W	AAD10		1.0384	-0.14437	0.059855	1.0093	-0.77116	0.19341		2.05395	0.904774	1.04236	2.01293	0.585946	1.14346
YOL091W	SPO21		1.0382	-0.019481	-0.45828	-0.16364	-0.13343	1.0171		2.05366	0.986588	0.727853	0.89277	0.911661	2.02385
YPL164C	MLH3		1.0378	0.2247	-0.019082	0.15853	0.42593	-0.63655		2.05309	1.16853	0.98686	1.11615	1.34344	0.643249
YGL089C			1.0374	-1.9394	-0.081617	-0.46273	0.7463	0.18539		2.05253	0.260725	0.944998	0.725612	1.67749	1.13712
YDR536W	STL1		1.0372	-0.15737	-0.23402	0.53527	0.98983	-0.40185		2.05224	0.896658	0.850262	1.44921	1.98595	0.756887
YPL257W			1.0371	0.28015	0.045628	0.53195	-0.071592	0.54182		2.0521	1.21432	1.03213	1.44588	0.951587	1.45581
YJL147C	MRX5		1.0346	-0.11219	-0.32143	-0.12879	0.22657	0.0075099		2.04855	0.925183	0.800276	0.914598	1.17005	1.00522
YPL187W			1.0342	-0.69614	-0.0004059	-0.36275	0.62839	-0.28642		2.04798	0.617221	0.999719	0.777681	1.54584	0.819934
YPR057W	BRR1		1.0342	0.15412	0.54713	0.4104	-0.13569	-0.77722		2.04798	1.11274	1.46118	1.32905	0.910234	0.58349
YKL044W			1.0338	0.14901	0.096523	0.53273	-0.68574	-0.78765		2.04741	1.10881	1.06919	1.44666	0.621687	0.579287
YLR245C	CDD1		1.0325	-0.10234	-0.065453	0.14272	0.80328	-0.89222		2.04557	0.931521	0.955645	1.10398	1.74506	0.538784
YJL057C	IKS1		1.0322	0.43953	-0.11648	1.0368	-0.039332	-0.15919		2.04514	1.35616	0.922436	2.05167	0.973105	0.895528
YGR062C	COX18		1.0313	-0.21537	0.36851	-0.32558	0.59397	-1.1623		2.04387	0.861325	1.29102	0.797978	1.50939	0.4468
YER150W	SPI1		1.0308	1.0863	0.56706	0.41578	2.4507	-0.557		2.04316	2.12329	1.4815	1.33402	5.46681	0.679714
YNL012W	SPO1		1.03	-0.27823	-0.26285	0.21913	0.47518	-1.074		2.04202	0.824602	0.83344	1.16403	1.39009	0.475
YJR004C	SAG1		1.0292	-1.8807	-0.079806	-0.96115	1.7721	0.92345		2.04089	0.271552	0.946185	0.513647	3.41551	1.89665
YML119W			1.0288	0.24402	-0.40732	0.59752	-0.11869	-0.63153		2.04033	1.18429	0.754023	1.51311	0.921024	0.645491
YLR228C	ECM22		1.0282	0.09248	-0.4584	0.26513	0.1471	-1.1556		2.03948	1.0662	0.727793	1.20174	1.10734	0.448879
YGR142W	BTN2		1.0276	1.255	0.31508	1.801	0.056199	-1.55		2.03863	2.38667	1.24408	3.48462	1.03972	0.34151
YJR115W			1.0273	-0.42362	-0.11236	-0.1253	0.82054	-0.56089		2.03821	0.745552	0.925074	0.916813	1.76607	0.677884
YGL124C	MON1		1.0266	-0.19628	-0.097105	-0.023655	0.2647	-0.46051		2.03722	0.872798	0.934907	0.983737	1.20139	0.726729
YIL160C	POT1		1.0253	0.82989	1.1744	-0.12233	-0.11853	-0.29313		2.03538	1.77755	2.25699	0.918703	0.921126	0.81613
YNR059W	MNT4		1.0243	-0.27375	-0.075719	0.45704	0.19581	-0.84593		2.03397	0.827167	0.948869	1.37272	1.14537	0.556352
YDL216C	RRI1		1.0232	0.25702	0.20081	0.14445	-0.033441	-0.49865		2.03242	1.19501	1.14934	1.10531	0.977087	0.707769
YOL159C-A			1.0228	-0.72339	0.045198	0.44391	0.3405	-1.9277		2.03186	0.605673	1.03182	1.36029	1.2662	0.262848
YPL148C	PPT2		1.0212	0.38947	0.38967	1.1572	1.1544	-0.96188		2.02961	1.30991	1.31009	2.23024	2.22592	0.513387
YNL223W	ATG4		1.0211	0.2807	0.44165	0.70469	0.11136	-0.95354		2.02947	1.21478	1.35816	1.62979	1.08025	0.516364
YBL044W			1.0202	0.08247	NaN	0.23868	0.057234	0.84452		2.0282	1.05883	N/A	1.17991	1.04047	1.79567
YBR020W	GAL1		1.0194	0.44557	0.042872	0.13375	0.61153	0.40869		2.02708	1.36185	1.03016	1.09714	1.52788	1.32748
YBR294W	SUL1		1.0173	-0.089001	0.074284	0.11833	0.45373	-0.40927		2.02413	0.940174	1.05284	1.08548	1.36958	0.753004
YGR131W	FHN1		1.0165	0.40427	0.17565	0.30019	0.21115	-0.27881		2.02301	1.32342	1.12947	1.23131	1.15761	0.824271
YJR116W	TDA4		1.0151	-0.20411	0.36676	0.1258	0.55064	-0.96775		2.02104	0.868074	1.28945	1.09111	1.46474	0.511303
YGL259W	YPS5		1.0134	0.083215	1.0536	0.10403	-0.22078	0.21861		2.01866	1.05938	2.0757	1.07477	0.858101	1.16361
YDL020C	RPN4		1.0084	0.60272	0.029335	0.83137	0.48151	-0.96523		2.01168	1.51858	1.02054	1.77937	1.3962	0.512197
YOR389W			1.008	0.0019338	-0.1932	2.7811	0.15328	-0.5055		2.01112	1.00134	0.874664	6.87376	1.11209	0.704416
YLR177W			1.0065	-0.060835	-0.26077	0.68077	0.030561	-1.2752		2.00903	0.958709	0.834642	1.603	1.02141	0.413168
YDR358W	GGA1		1.0062	0.67261	0.048504	0.81586	-0.60849	-0.42836		2.00861	1.59395	1.03419	1.76035	0.655883	0.743106
YIL073C	SPO22		1.0048	0.3488	0.11599	0.50698	0.25821	-0.776		2.00667	1.2735	1.08372	1.42107	1.19599	0.583984
YPL245W			1.0046	0.64465	0.7636	1.1025	1.049	-1.6039		2.00639	1.56336	1.69772	2.14726	2.0691	0.328986
YHR058C	MED6		1.0034	-0.42494	-0.19312	0.15872	0.32275	-0.50977		2.00472	0.74487	0.874712	1.1163	1.25071	0.702334
YBL019W	APN2		1.0032	0.51901	0.65842	0.35083	-0.30398	-0.42425		2.00444	1.43297	1.57835	1.27529	0.810015	0.745226
YGR248W	SOL4		1.0014	0.3535	0.59781	0.41275	0.35626	0.71552		2.00194	1.27766	1.51342	1.33122	1.2801	1.64207
YJR154W			1.0002	0.29925	0.34146	0.70047	-0.9747	1.469		2.00028	1.2305	1.26704	1.62503	0.508846	2.7683
YNL027W	CRZ1		0.99915	0.1102	-0.56592	0.29702	-0.15044	-0.73191		1.99882	1.07938	0.675525	1.2286	0.900976	0.602106
YGL134W	PCL10		0.99697	0.50257	0.27599	0.25935	0.36221	-0.89261		1.9958	1.41674	1.21082	1.19694	1.28539	0.538639
YLR254C	NDL1		0.99613	-0.18766	-0.44054	-0.075049	0.132	-1.543		1.99464	0.878029	0.736859	0.94931	1.09581	0.343171
YDR231C	COX20		0.99584	-0.049528	0.19737	0.13977	0.81766	-0.85023		1.99424	0.966252	1.14661	1.10173	1.76254	0.554696
YPL077C			0.99442	-0.24189	-0.2209	-0.092236	0.18933	-0.57126		1.99228	0.845637	0.85803	0.938068	1.14023	0.673029
YGL170C	SPO74		0.99313	-0.038597	-0.43327	0.58367	0.37621	-0.19723		1.9905	0.973601	0.740581	1.49866	1.29793	0.872224
YDR173C	ARG82		0.99122	0.48102	0.082888	0.26219	0.6484	-0.97375		1.98787	1.39573	1.05914	1.1993	1.56743	0.509181
YKL132C	RMA1		0.99021	-0.27733	0.19677	0.52771	0.48637	-0.64489		1.98647	0.825117	1.14613	1.44164	1.40092	0.639542
YGR188C	BUB1		0.9901	-0.033126	-0.077778	0.012753	0.69846	-0.63387		1.98632	0.9773	0.947516	1.00888	1.62277	0.644445
YDR014W-A	HED1		0.98948	-0.38405	-0.28809	0.30218	0.00718	-1.0877		1.98547	0.766283	0.818986	1.23301	1.00499	0.470511
YOL083W	ATG34		0.98936	0.76015	0.28322	1.1968	-0.1057	-0.68078		1.9853	1.69367	1.21691	2.29231	0.929354	0.623828
YGL075C	MPS2		0.98916	-0.27475	0.47591	-0.073662	0.54253	-1.0959		1.98503	0.826594	1.3908	0.950223	1.45652	0.467844
YJR098C			0.98808	-0.055916	-0.33784	-0.32187	0.33821	-0.49298		1.98354	0.961983	0.791225	0.800032	1.26419	0.710556
YIL097W	FYV10		0.98672	0.45287	-0.17918	0.88663	-0.5893	-0.68681		1.98167	1.36876	0.883205	1.84885	0.664665	0.621226
YJL016W			0.9867	0.12332	0.59375	0.93723	0.37897	-0.88833		1.98165	1.08924	1.50916	1.91485	1.30041	0.540239
YIL072W	HOP1		0.98666	0.013293	0.048033	0.40058	0.3652	-0.62984		1.98159	1.00926	1.03385	1.32004	1.28806	0.646248
YAR029W			0.98342	-0.0087786	-0.26653	0.48753	1.2255	0.13013		1.97715	0.993934	0.831317	1.40204	2.33836	1.09439
YBL039W-B			0.98325	0.16298	0.18948	0.69532	0.14152	-1.6544		1.97691	1.1196	1.14035	1.61924	1.10307	0.31767
YNL270C	ALP1		0.9827	-0.05535	-0.39988	1.4112	1.5571	-0.43087		1.97616	0.962361	0.757921	2.65958	2.94262	0.741814
YKL159C	RCN1		0.98248	0.10218	-0.17073	0.16925	0.4255	-0.91709		1.97586	1.07339	0.888393	1.12447	1.34304	0.529576
YFL040W			0.98205	-0.31544	-0.14857	-0.098037	1.1987	0.44367		1.97527	0.803606	0.902144	0.934303	2.29533	1.36006
YIL165C			0.97894	-0.26169	-0.4322	0.27261	-0.056681	0.00082357		1.97102	0.83411	0.741131	1.20799	0.961474	1.00057
YMR087W			0.97796	0.61811	0.44793	0.96784	0.39283	-0.39226		1.96968	1.53486	1.36408	1.95591	1.31297	0.761935
YDR315C	IPK1		0.97792	0.099293	0.013261	0.15363	0.25789	-0.80545		1.96962	1.07125	1.00923	1.11236	1.19573	0.572184
YLR013W	GAT3		0.9751	0.30195	0.35551	1.1737	0.2467	0.10932		1.96578	1.23281	1.27944	2.2559	1.18649	1.07872
YER093C-A	AIM11		0.97263	0.067979	-0.27058	-0.076108	0.45631	-1.0039		1.96241	1.04825	0.828986	0.948613	1.37203	0.49865
YAL034C	FUN19		0.9724	-0.36838	-0.26627	-0.08076	1.1297	-0.87852		1.9621	0.774652	0.831466	0.945559	2.18813	0.543925
YML087C	AIM33		0.97195	0.37612	0.69122	1.1228	0.57081	-0.40308		1.96149	1.29785	1.61465	2.17769	1.48536	0.756242
YJL218W			0.97145	-0.26983	-0.2069	-0.97291	0.55278	-1.6357		1.96081	0.829417	0.866397	0.509477	1.46691	0.321814
YMR138W	CIN4		0.97067	-0.025098	-0.38675	-0.85745	-0.1366	-1.2259		1.95975	0.982754	0.764851	0.551927	0.90966	0.427531
YOL158C	ENB1		0.96982	0.36608	-0.060747	-0.71655	0.49992	-0.81221		1.9586	1.28885	0.958768	0.608551	1.41414	0.569509
YHL024W	RIM4		0.96929	0.1934	0.030731	1.3857	0.17933	-0.33682		1.95788	1.14346	1.02153	2.61299	1.13236	0.791785
YAL037W			0.96904	0.29485	-0.22913	0.16849	1.2039	0.072839		1.95754	1.22676	0.853149	1.12388	2.30362	1.05178
YCL049C			0.96719	0.74707	0.25402	0.806	0.63959	-0.8412		1.95503	1.67838	1.19253	1.74836	1.55789	0.558179
YLR176C	RFX1		0.96682	-0.10391	-0.038145	-0.088348	0.33217	-1.0825		1.95453	0.930508	0.973906	0.940599	1.25891	0.47221
YLR139C	SLS1		0.96514	-0.79403	-0.16388	-0.35059	0.64765	-0.75245		1.95225	0.576731	0.892621	0.784263	1.56661	0.593595
YHR105W	YPT35		0.9623	0.38086	-0.018738	0.5484	0.025693	-0.21163		1.94841	1.30212	0.987096	1.46246	1.01797	0.863561
YDR082W	STN1		0.96146	0.33574	-0.16099	0.44321	0.0651	-0.7023		1.94728	1.26202	0.894411	1.35963	1.04616	0.614592
YKR015C			0.95577	0.37883	0.079342	0.53413	0.16737	-0.38874		1.93961	1.30029	1.05654	1.44807	1.12301	0.763796
YOR394W	PAU21		0.95394	0.28197	0.12081	0.70135	-0.75069	-0.7942		1.93716	1.21585	1.08735	1.62603	0.594319	0.576663
YOR137C	SIA1		0.95331	-0.40972	0.028551	-0.16739	0.32163	-1.139		1.93631	0.752769	1.01999	0.890452	1.24974	0.454074
YNR060W	FRE4		0.95234	-0.29778	-0.12378	-0.98316	0.34533	-1.7002		1.93501	0.813503	0.91778	0.50587	1.27044	0.307743
YIR027C	DAL1		0.9517	-0.085057	-0.39688	-0.46211	0.62763	-0.58638		1.93415	0.942747	0.759499	0.725924	1.54502	0.666012
YGL085W	LCL3		0.95155	-0.68251	-0.37212	0.12466	0.010213	-1.4394		1.93395	0.62308	0.772646	1.09025	1.0071	0.368721
YPR101W	SNT309		0.95145	0.013861	-0.48598	0.51584	0.14034	-1.2306		1.93382	1.00965	0.714012	1.42983	1.10216	0.42614
YJL023C	PET130		0.95097	-0.2223	-0.46308	0.39807	0.36338	-0.37534		1.93317	0.857198	0.725436	1.31774	1.28644	0.770924
YMR242W-A			0.95093	-0.63329	-0.8653	0.52796	1.0287	-0.67845		1.93312	0.644705	0.548932	1.44189	2.04019	0.624836
YBR033W	EDS1		0.9498	0.023091	-0.049529	0.25441	0.6663	1.0883		1.9316	1.01613	0.966252	1.19285	1.587	2.12623
YLR242C	ARV1		0.94937	-0.17768	-0.11446	0.41214	1.1965	-1.0945		1.93103	0.884124	0.923728	1.33066	2.29183	0.468298
YNL033W			0.94909	-0.25257	-0.63922	-0.22414	0.67253	-0.25577		1.93065	0.8394	0.64206	0.856105	1.59387	0.83754
YHR011W	DIA4		0.94811	0.47363	0.21781	0.48695	-0.17816	-0.4773		1.92934	1.3886	1.16297	1.40148	0.88383	0.718321
YAR023C			0.94792	-0.37364	-0.38502	0.22373	1.4487	-0.89061		1.92909	0.771833	0.765768	1.16775	2.72962	0.539386
YPL033C	SRL4		0.94738	0.18001	-0.58133	0.2796	0.29888	0.19431		1.92837	1.13289	0.668347	1.21386	1.23019	1.14418
YML023C	NSE5		0.94699	-0.39306	-0.15347	-0.27351	0.62233	-1.2082		1.92785	0.761513	0.899085	0.827304	1.53936	0.432808
YGL180W	ATG1		0.94633	0.60237	0.030064	0.58527	-0.59748	-0.77474		1.92696	1.51821	1.02106	1.50032	0.660907	0.584494
YPL166W	ATG29		0.94388	0.29792	0.54418	0.85259	-0.34118	-0.66702		1.92369	1.22937	1.45819	1.80574	0.789395	0.629806
YIL055C			0.94222	0.38544	0.1739	0.138	0.48696	-0.80129		1.92148	1.30626	1.1281	1.10038	1.40149	0.573836
YPR153W			0.94182	-0.023424	-0.68575	-0.081695	0.62989	-0.52197		1.92095	0.983895	0.621683	0.944947	1.54745	0.69642
YMR163C	INP2		0.94118	-0.17395	-0.026583	0.36578	0.030714	-1.3537		1.9201	0.886412	0.981743	1.28858	1.02152	0.391287
YGL258W	VEL1		0.94081	-0.44063	-0.2352	-0.1492	0.30271	0.046035		1.91961	0.736813	0.849567	0.90175	1.23346	1.03242
YDR386W	MUS81		0.94052	0.1246	-0.33406	0.2222	-0.18435	-0.6414		1.91922	1.09021	0.793301	1.16651	0.880045	0.641091
YIR018W	YAP5		0.93942	0.30483	0.12582	0.28173	-0.20394	-1.1952		1.91776	1.23527	1.09113	1.21565	0.868176	0.436726
YDR242W	AMD2		0.93938	0.23092	0.35652	0.49613	0.73777	-0.23861		1.9177	1.17358	1.28033	1.41043	1.6676	0.847562
YGL175C	SAE2		0.93728	-0.16773	0.38481	0.03239	0.52255	-0.46435		1.91491	0.890242	1.30569	1.0227	1.43649	0.724798
YGR146C-A			0.93088	-0.51318	1.1791	0.57783	0.47899	-0.040385		1.90644	0.700676	2.26435	1.4926	1.39377	0.972395
YIL056W	VHR1		0.92981	-0.040358	0.22201	-0.24075	0.18471	-0.2013		1.90503	0.972414	1.16636	0.846305	1.13659	0.869766
YLL057C	JLP1		0.92975	-0.38266	-0.012027	0.014883	0.15734	-0.6084		1.90495	0.767022	0.991698	1.01037	1.11523	0.655924
YHR175W	CTR2		0.92891	-0.26525	-0.33047	0.76031	0.69775	3.5847		1.90384	0.832055	0.795277	1.69385	1.62197	11.9978
YIR025W	MND2		0.92785	0.31544	0.062873	0.23651	-0.10112	-0.66196		1.90244	1.24439	1.04454	1.17814	0.932309	0.632019
YDL138W	RGT2		0.92754	0.077538	-0.19546	0.22576	0.14844	-0.51787		1.90203	1.05522	0.873294	1.16939	1.10837	0.698402
YNR072W	HXT17		0.92652	-0.096928	-0.33634	-0.34814	-0.54104	-0.32114		1.90069	0.935022	0.792048	0.785596	0.687275	0.800437
YHL019C	APM2		0.92591	-0.069385	0.46299	0.2219	-0.021189	-0.85546		1.89988	0.953044	1.3784	1.16627	0.98542	0.552689
YOR385W			0.92571	-0.59068	-0.2522	0.077245	0.44234	-0.57622		1.89962	0.66403	0.839615	1.055	1.35881	0.670719
YLR036C			0.92512	-0.79281	-0.23692	-0.51819	0.32367	-1.1593		1.89884	0.577219	0.848555	0.698247	1.25151	0.44773
YNR007C	ATG3		0.92369	0.20816	-0.18211	0.17567	-0.25166	-0.3931		1.89696	1.15521	0.881413	1.12949	0.839929	0.761492
YNL194C			0.92357	0.26073	0.13633	0.56861	0.38351	-0.509		1.8968	1.19808	1.09911	1.48309	1.30451	0.702709
YBR090C			0.92329	-0.032696	0.16705	-0.10754	1.2603	-0.85252		1.89644	0.977592	1.12276	0.928169	2.39546	0.553817
YIL113W	SDP1		0.92222	0.41662	0.41995	1.0298	0.64466	-0.96883		1.89503	1.3348	1.33788	2.04174	1.56337	0.51092
YER071C	TDA2		0.92167	0.17204	0.55266	0.50824	0.36314	-1.7073		1.89431	1.12665	1.46679	1.42231	1.28622	0.306233
YLL038C	ENT4		0.92123	0.044605	0.91893	-0.30135	0.20908	-0.67926		1.89373	1.0314	1.89071	0.811493	1.15595	0.624486
YER147C	SCC4		0.92105	-0.0077564	0.28821	-0.25818	0.64887	-0.77372		1.89349	0.994638	1.22112	0.836142	1.56794	0.584907
YDR416W	SYF1		0.92035	0.38014	1.2413	0.17727	-0.14935	-1.4635		1.89257	1.30147	2.36411	1.13074	0.901657	0.362612
YOR049C	RSB1		0.92022	1.185	0.15066	0.21981	-0.1299	-0.52663		1.8924	2.27363	1.11008	1.16458	0.913895	0.694174
YNL211C	MRX7		0.92019	-0.31308	-0.84881	-0.4233	0.20794	-1.151		1.89236	0.804922	0.555243	0.745717	1.15504	0.450313
YMR077C	VPS20		0.91758	-0.49234	-0.50508	-0.23195	-0.056048	-0.97768		1.88894	0.710871	0.704621	0.851483	0.961895	0.507796
YGR031W	IMO32		0.91678	0.20984	-0.22393	0.44668	-0.21041	-0.71098		1.8879	1.15656	0.85623	1.3629	0.864292	0.610905
YNL237W	YTP1		0.91665	-0.24478	-0.18592	0.25431	0.60591	-0.58248		1.88773	0.843944	0.879088	1.19277	1.52194	0.667815
YDR249C			0.91547	-0.86193	-0.50319	0.13945	2.2409	-1.4507		1.88618	0.550216	0.705545	1.10149	4.72692	0.365844
YLR392C	ART10		0.91479	0.11054	-0.40918	-0.40152	0.064799	-0.4014		1.88529	1.07963	0.753051	0.75706	1.04594	0.757123
YLR297W			0.9144	-0.060544	-0.20069	-0.13836	0.49477	-0.14753		1.88479	0.958902	0.870134	0.908551	1.4091	0.902795
YPL282C	PAU22		0.91372	-0.09521	-0.28953	0.26675	-0.18482	-0.86526		1.8839	0.936136	0.818169	1.20309	0.879759	0.548947
YER058W	PET117		0.91008	0.3926	0.33231	-0.1932	-0.3609	-1.6959		1.87915	1.31276	1.25903	0.874664	0.778679	0.308662
YJL099W	CHS6		0.90947	0.059361	0.21844	0.66318	0.14518	-0.3807		1.87836	1.042	1.16347	1.58357	1.10587	0.768065
YMR060C	SAM37		0.9088	0.15905	-0.50331	0.64765	0.35288	-1.5284		1.87748	1.11655	0.705486	1.56661	1.27711	0.346662
YDL049C	KNH1		0.90631	0.051769	-0.15847	-1.0197	1.3173	-1.3077		1.87425	1.03654	0.895975	0.493219	2.49199	0.403964
YLR267W	BOP2		0.90556	1.5981	1.2715	0.42926	-0.014002	0.61782		1.87327	3.02744	2.41412	1.34654	0.990341	1.53455
YFL029C	CAK1		0.90516	-0.13024	-0.19665	-0.13188	-0.058749	-0.69224		1.87275	0.913679	0.872574	0.912641	0.960096	0.618892
YOL113W	SKM1		0.90341	0.074092	0.56932	0.66443	0.079332	-0.69461		1.87048	1.0527	1.48382	1.58494	1.05653	0.617876
YPR115W	RGC1		0.90331	0.40891	-0.239	1.1033	-0.0096412	-0.17778		1.87035	1.32768	0.847332	2.14846	0.99334	0.884062
YJR039W			0.90244	0.2486	0.15346	0.33427	-0.24628	-0.84904		1.86922	1.18805	1.11223	1.26074	0.843067	0.555154
YLR415C			0.90234	-0.23313	-0.30339	-0.3475	1.3378	0.27842		1.8691	0.850787	0.810346	0.785945	2.52766	1.21287
YMR023C	MSS1		0.9021	-0.34269	-0.50009	0.099955	0.63049	-0.32395		1.86878	0.78857	0.707063	1.07174	1.54809	0.79888
YPL109C			0.90173	0.35645	0.43553	-0.0053939	0.20676	-0.64193		1.86831	1.28027	1.35241	0.996268	1.15409	0.640855
YDL069C	CBS1		0.90072	-0.43888	-0.57456	0.42642	0.52732	-1.6456		1.867	0.737707	0.671491	1.34389	1.44125	0.319613
YPL003W	ULA1		0.9002	0.16634	0.018477	0.49427	0.56717	-0.51356		1.86632	1.12221	1.01289	1.40861	1.48161	0.700492
YOR005C	DNL4		0.89921	0.25526	0.023884	0.51657	0.30671	-0.45832		1.86504	1.19355	1.01669	1.43055	1.23688	0.727833
YJR158W	HXT16		0.89887	-0.43655	-0.4515	0.1686	-0.60497	-0.17356		1.8646	0.738899	0.731282	1.12397	0.657485	0.886652
YLL060C	GTT2		0.89878	-0.092351	0.48384	0.73367	-1.4154	-0.715		1.86449	0.937993	1.39846	1.66286	0.374906	0.609205
YDR085C	AFR1		0.89649	0.1074	0.009638	0.39387	0.47996	-0.41377		1.86153	1.07729	1.0067	1.31391	1.3947	0.750659
YOR386W	PHR1		0.89507	0.92548	0.18048	0.31088	-0.71128	-0.96934		1.8597	1.89932	1.13326	1.24046	0.610778	0.51074
YOR152C			0.89506	0.57762	-0.16649	0.87113	0.49362	-0.71636		1.85969	1.49239	0.891008	1.82909	1.40797	0.608631
YPL277C			0.89496	-0.13692	-0.17815	2.4775	0.53869	-0.38996		1.85956	0.909459	0.883836	5.56932	1.45265	0.763151
YLR225C			0.89482	-0.089223	0.097451	0.58183	0.17164	-0.74769		1.85938	0.940029	1.06988	1.49675	1.12634	0.595556
YLL056C			0.89225	-0.19067	-0.35034	0.79951	0.43817	-1.0184		1.85607	0.876199	0.784399	1.74051	1.35488	0.493664
YDR461C-A			0.89147	-0.36588	-0.54096	0.13413	0.50114	-1.3703		1.85507	0.775995	0.687313	1.09743	1.41533	0.386811
YJR153W	PGU1		0.89098	-0.096159	-0.12689	0.14478	0.040186	-0.49955		1.85444	0.93552	0.915804	1.10556	1.02825	0.707327
YDR391C			0.8901	-0.48521	0.0021834	0.29025	0.025	-1.5061		1.8533	0.714393	1.00151	1.22285	1.01748	0.352062
YML002W			0.88677	0.12654	-0.15569	0.39022	-0.17099	-1.0822		1.84903	1.09167	0.897703	1.31059	0.888233	0.472308
YPL041C	MRX11		0.88529	0.07951	-0.077132	0.16665	1.0052	-1.0512		1.84714	1.05666	0.94794	1.12245	2.00722	0.482567
YCR018C	SRD1		0.88501	-0.07309	-0.31488	0.90789	0.47818	-1.4281		1.84678	0.9506	0.803918	1.8763	1.39299	0.37162
YML088W	UFO1		0.88385	-0.066483	0.3773	0.15983	0.1153	-0.40216		1.84529	0.954963	1.29891	1.11716	1.0832	0.756724
YHR211W	FLO5		0.8832	0.12114	0.27178	0.4935	1.901	-0.46483		1.84446	1.08759	1.2073	1.40786	3.73472	0.724556
YNR069C	BSC5		0.88202	0.34196	-0.041159	0.38455	-0.88133	-0.26608		1.84295	1.26748	0.971874	1.30545	0.542867	0.831576
YHR140W			0.87986	0.68164	0.92406	1.177	-0.1272	-1.5082		1.8402	1.60396	1.89745	2.26106	0.915607	0.35155
YJR053W	BFA1		0.87871	-0.25414	0.51301	0.22222	0.00017104	-1.0284		1.83873	0.838487	1.42702	1.16653	1.00012	0.490254
YPR026W	ATH1		0.87801	0.60394	0.56766	1.2384	0.049785	-0.53432		1.83784	1.51986	1.48212	2.35937	1.03511	0.690484
YLR423C	ATG17		0.87564	0.021392	0.64613	0.30166	1.006	-0.34475		1.83482	1.01494	1.56496	1.23256	2.00834	0.787444
YNR075C-A			0.87508	0.38767	0.28361	0.6097	-1.4963	-0.29071		1.83411	1.30828	1.21724	1.52594	0.354461	0.8175
YBR035C	PDX3		0.87468	-0.26616	0.46281	0.36244	-0.1332	-1.3033		1.8336	0.83153	1.37822	1.2856	0.911807	0.405198
YOR279C	RFM1		0.87339	-0.41011	-0.37596	0.22668	0.054124	-0.97887		1.83196	0.752566	0.770592	1.17014	1.03823	0.507377
YLR251W	SYM1		0.87135	0.24553	0.44797	1.3357	0.37268	-1.2867		1.82937	1.18553	1.36412	2.52398	1.29476	0.409888
YMR301C	ATM1		0.87045	-0.65894	0.33056	-0.41059	-0.039433	-0.77391		1.82823	0.633343	1.2575	0.752316	0.973037	0.58483
YGL090W	LIF1		0.86959	0.14662	0.27383	0.54618	0.024169	0.59976		1.82714	1.10697	1.20901	1.46021	1.01689	1.51546
YOL163W			0.86957	0.47056	0.14458	1.004	-0.92725	-0.97543		1.82712	1.38565	1.10541	2.00555	0.52586	0.508588
YDR228C	PCF11		0.86816	0.26237	-0.082283	0.28623	1.5412	-1.1481		1.82533	1.19945	0.944562	1.21945	2.91036	0.451219
YAL061W	BDH2		0.86694	0.39015	0.59943	-0.2087	1.378	-0.31036		1.82379	1.31053	1.51512	0.865317	2.59908	0.806441
YKL050C			0.8657	0.20207	0.23702	0.42844	0.071689	0.036659		1.82222	1.15035	1.17856	1.34578	1.05095	1.02574
YNL277W	MET2		0.8654	-0.16299	0.051926	0.40083	0.2172	-0.65912		1.82184	0.893172	1.03665	1.32027	1.16248	0.633264
YDL177C			0.86487	-0.1195	-0.46416	-0.049959	0.055132	-1.3804		1.82118	0.920507	0.724893	0.965964	1.03895	0.384112
YNL254C	RTC4		0.86483	0.47694	0.03387	0.08679	0.43866	-0.71633		1.82113	1.39179	1.02375	1.062	1.35534	0.608644
YLR219W	MSC3		0.86277	0.27518	0.46569	0.64953	-0.15151	-0.54397		1.81853	1.21015	1.38098	1.56866	0.900308	0.685881
YMR156C	TPP1		0.86085	0.14876	-0.27593	0.80328	0.16281	-0.82332		1.81611	1.10862	0.825918	1.74506	1.11947	0.56514
YGL143C	MRF1		0.86059	0.38298	0.089635	-0.059302	-0.081887	-0.46872		1.81578	1.30403	1.0641	0.959728	0.944821	0.722605
YOR192C-C			0.86055	-0.025622	0.19507	1.1501	0.10488	0.51662		1.81573	0.982397	1.14478	2.21929	1.0754	1.4306
YKL086W	SRX1		0.85995	0.24028	0.54198	1.2203	0.7244	0.055646		1.81498	1.18122	1.45597	2.32995	1.65221	1.03932
YDL239C	ADY3		0.85876	0.43565	0.24886	1.1478	-0.12214	-0.5939		1.81348	1.35252	1.18827	2.21576	0.918824	0.662549
YOR034C-A			0.85858	0.05088	0.27489	1.2852	0.62467	-0.27219		1.81325	1.0359	1.2099	2.43716	1.54186	0.828062
YOR054C	VHS3		0.8558	0.23041	1.0581	0.2422	0.095395	-0.73742		1.80976	1.17317	2.08219	1.18279	1.06836	0.599811
YLL055W	YCT1		0.85552	0.42799	-0.20546	0.12116	-0.10782	-0.34999		1.80941	1.34536	0.867262	1.08761	0.927989	0.78459
YDL119C			0.85471	-0.53958	-0.75445	-0.21845	0.52626	-0.16671		1.8084	0.687971	0.592772	0.859488	1.44019	0.890872
YER142C	MAG1		0.85412	0.13841	-0.17439	0.19592	0.422	-1.5569		1.80766	1.10069	0.886142	1.14545	1.33978	0.339881
YBR085C-A			0.85368	0.065556	-0.1733	0.13722	0.6611	-1.0236		1.8071	1.04649	0.886812	1.09978	1.58129	0.491887
YJR019C	TES1		0.85303	0.083177	0.16762	0.056819	0.4812	-1.3494		1.80629	1.05935	1.1232	1.04017	1.3959	0.392455
YFL030W	AGX1		0.85183	-0.14269	-0.12379	0.78828	0.087188	-0.029149		1.80479	0.905829	0.917773	1.72701	1.0623	0.979998
YER015W	FAA2		0.85059	-0.12386	-0.07054	0.25496	0.22126	-0.62566		1.80324	0.917729	0.952281	1.1933	1.16575	0.648123
YBR135W	CKS1		0.84944	-0.17961	0.53389	0.34158	0.5128	-0.5879		1.8018	0.882942	1.44783	1.26714	1.42682	0.665311
YAR035C-A			0.84535	NaN	NaN	0.54058	2.3615	NaN		1.7967	N/A	N/A	1.45456	5.13904	N/A
YHL006C	SHU1		0.84312	-0.3305	-0.12116	0.3935	0.75374	-1.175		1.79393	0.795261	0.919448	1.31358	1.68616	0.442884
YIL011W	TIR3		0.84235	-0.17944	-0.27067	0.47524	0.34561	-0.6587		1.79297	0.883046	0.828934	1.39015	1.27069	0.633449
YJR036C	HUL4		0.84119	0.31392	0.011258	0.57988	-0.33934	-0.46543		1.79153	1.24308	1.00783	1.49472	0.790403	0.724255
YGR212W	SLI1		0.83947	0.38742	-0.035261	0.43514	0.10759	-0.74688		1.78939	1.30805	0.975855	1.35204	1.07743	0.595891
YIL037C	PRM2		0.83933	0.12872	0.16687	1.2825	0.21438	-0.49596		1.78922	1.09332	1.12262	2.4326	1.16021	0.70909
YLR151C	PCD1		0.83927	0.25973	0.61623	-0.1238	0.32685	-0.53533		1.78914	1.19725	1.53286	0.917767	1.25427	0.690001
YKL208W	CBT1		0.83774	0.051793	-0.37651	1.1224	-0.060036	-0.85429		1.78725	1.03655	0.770299	2.17709	0.95924	0.553137
YBR168W	PEX32		0.83606	-0.22406	-0.15121	0.33908	0.068054	-1.23		1.78517	0.856153	0.900495	1.26495	1.0483	0.426317
YDL109C			0.83498	0.098866	0.34231	0.18072	0.32523	-0.54367		1.78383	1.07093	1.26778	1.13345	1.25286	0.686024
YMR101C	SRT1		0.83483	-0.040582	0.26852	-0.86786	0.38203	-0.29639		1.78365	0.972263	1.20457	0.547959	1.30317	0.814287
YPR009W	SUT2		0.83344	-0.043914	0.021088	0.042833	0.41001	-0.25587		1.78193	0.97002	1.01472	1.03013	1.3287	0.837482
YDL197C	ASF2		0.83338	0.10486	0.03916	-0.055412	0.24509	-0.90511		1.78186	1.07539	1.02752	0.96232	1.18517	0.533992
YLR011W	LOT6		0.83198	0.10544	-0.27261	0.42606	-0.048045	-0.26226		1.78013	1.07582	0.827821	1.34356	0.967246	0.833781
YOR242C	SSP2		0.83192	-0.52789	-0.32119	1.8335	0.60687	1.1034		1.78005	0.693568	0.800409	3.56401	1.52295	2.1486
YJR102C	VPS25		0.83114	-0.61897	-0.55061	-0.14353	0.18459	-1.0808		1.77909	0.651136	0.682731	0.905301	1.13649	0.472767
YDL243C	AAD4		0.83095	-0.49374	-0.00079491	0.16134	-0.16445	-1.0079		1.77886	0.710182	0.999449	1.11833	0.892269	0.49727
YAL064W-B			0.83003	0.30097	0.080312	0.32824	2.31	-0.55029		1.77772	1.23197	1.05725	1.25548	4.95883	0.682883
YFL011W	HXT10		0.82874	0.52506	-0.42563	0.45571	0.77924	0.5389		1.77613	1.43899	0.744514	1.37146	1.71623	1.45286
YGL247W	BRR6		0.8287	-0.045065	-0.064109	0.60139	0.23537	-0.75644		1.77608	0.969246	0.956536	1.51718	1.17721	0.591955
YOL016C	CMK2		0.82786	-0.0092553	-0.36402	0.17422	0.60068	0.027215		1.77505	0.993605	0.776996	1.12835	1.51643	1.01904
YLR173W			0.82712	0.67364	0.72407	0.5095	0.32537	-0.78159		1.77414	1.59509	1.65184	1.42356	1.25299	0.581725
YLR263W	RED1		0.82592	0.35464	0.10775	0.35865	-0.39764	-0.39265		1.77267	1.27867	1.07755	1.28223	0.759099	0.761729
YER066W	RRT13		0.82525	-0.11726	-0.15001	0.35793	-0.067191	-1.1683		1.77184	0.921937	0.901244	1.28159	0.954495	0.444945
YLR281C			0.82514	0.00038375	-0.012182	0.54384	1.0567	-0.25661		1.77171	1.00027	0.991592	1.45785	2.08017	0.837052
YLR010C	TEN1		0.82465	-0.38672	-0.46663	-0.076706	0.63942	-1.6939		1.77111	0.764867	0.723653	0.94822	1.5577	0.30909
YOL116W	MSN1		0.82464	0.18278	-0.38811	0.81694	-0.17477	-0.70725		1.77109	1.13507	0.76413	1.76167	0.885909	0.612487
YBL106C	SRO77		0.8239	-0.02597	-0.16847	0.91609	0.60274	-0.2173		1.77018	0.98216	0.889786	1.88699	1.5186	0.860174
YPL017C	IRC15		0.82336	-0.29515	0.4568	0.87383	0.42073	-0.25382		1.76952	0.814988	1.37249	1.83252	1.3386	0.838673
YOR393W	ERR1		0.82276	0.074043	0.37328	2.4191	-0.24817	0.039721		1.76879	1.05266	1.29529	5.34837	0.841964	1.02792
YDL033C	SLM3		0.82247	-0.048971	-0.15134	-0.48979	0.062683	-0.97175		1.76843	0.966626	0.900414	0.712129	1.04441	0.509887
YOR328W	PDR10		0.82117	-0.0076389	-0.17234	0.017055	0.21195	-0.63678		1.76684	0.994719	0.887402	1.01189	1.15825	0.643147
YGR223C	HSV2		0.821	-0.04058	-0.41354	0.48102	0.2222	-1.2002		1.76663	0.972264	0.750779	1.39573	1.16651	0.435215
YER039C	HVG1		0.82055	0.26826	0.027715	0.21352	0.2822	-0.57892		1.76608	1.20435	1.0194	1.15951	1.21605	0.669465
YGL059W	PKP2		0.81827	0.34638	0.10007	0.61913	-1.9132	0.89276		1.76329	1.27137	1.07183	1.53595	0.265503	1.85672
YEL030W	ECM10		0.81757	0.44154	0.19673	0.60386	-0.099102	-0.70356		1.76243	1.35805	1.1461	1.51978	0.933614	0.614055
YKL090W	CUE2		0.81696	0.4569	0.036621	0.63311	0.6248	-0.72062		1.76169	1.37259	1.02571	1.5509	1.542	0.606837
YAL020C	ATS1		0.81588	-0.56219	0.042485	-0.0235	1.6806	-0.97723		1.76037	0.677273	1.02989	0.983843	3.20561	0.507954
YHR160C	PEX18		0.81341	0.00045977	0.20271	0.92085	-0.078509	-0.51932		1.75736	1.00032	1.15086	1.89323	0.947036	0.697701
YPL155C	KIP2		0.81179	-0.24138	0.066291	0.17685	0.21732	-0.15326		1.75539	0.845936	1.04702	1.13041	1.16257	0.899216
YAL065C			0.81045	0.61713	0.068149	0.69103	1.3873	-0.78427		1.75376	1.53382	1.04837	1.61444	2.61589	0.580646
YER184C	TOG1		0.81012	-0.029089	0.11511	0.15498	0.15962	-0.59156		1.75336	0.980039	1.08306	1.11341	1.11699	0.663625
YLR376C	PSY3		0.81009	-0.058987	-0.17272	0.39485	0.44933	-0.40763		1.75332	0.959938	0.887168	1.31481	1.36541	0.753861
YIL152W			0.80988	0.21721	0.1594	0.48482	-0.64555	-0.38966		1.75307	1.16248	1.11682	1.39941	0.639249	0.763309
YDR213W	UPC2		0.80969	0.29055	0.37549	0.29159	1.1024	-1.0555		1.75283	1.22311	1.29728	1.22399	2.14712	0.48113
YOL100W	PKH2		0.80888	0.66543	-0.11724	0.73161	-0.36176	-0.41406		1.75185	1.58604	0.92195	1.66049	0.778215	0.750508
YGL128C	CWC23		0.80842	0.11295	-0.26412	-0.5386	0.77141	-1.1941		1.75129	1.08144	0.832707	0.688439	1.70694	0.437059
YJL185C	ATG36		0.80839	-0.073652	-0.12272	0.50338	0.51573	-0.28637		1.75126	0.95023	0.918454	1.41753	1.42972	0.819963
YMR075W	RCO1		0.80816	-0.07381	-0.32481	0.28966	0.044413	-0.57516		1.75098	0.950126	0.798404	1.22235	1.03126	0.671212
YDR512C	EMI1		0.8072	-0.77611	-0.52937	-0.28665	0.41113	-1.0475		1.74981	0.583939	0.692857	0.819803	1.32973	0.483806
YER084W			0.80623	-0.014778	0.71058	-0.086825	0.52857	-0.81362		1.74864	0.989809	1.63646	0.941593	1.4425	0.568952
YDR534C	FIT1		0.80418	1.3658	0.19991	0.075286	0.76263	-0.52274		1.74615	2.57719	1.14863	1.05357	1.69658	0.696049
YEL069C	HXT13		0.80253	0.23706	-0.18949	-0.11498	-0.73137	-0.20112		1.74416	1.17859	0.876916	0.923395	0.602332	0.869875
YER028C	MIG3		0.80252	-0.13665	0.37484	0.13191	0.35814	-1.2626		1.74415	0.909629	1.2967	1.09574	1.28177	0.416792
YLR342W-A			0.8011	-0.38319	-0.28925	0.70367	0.42698	1.2373		1.74243	0.76674	0.818327	1.62864	1.34442	2.35757
YDR406W	PDR15		0.80039	1.8342	1.0986	0.36477	0.43126	-0.14939		1.74157	3.56574	2.14147	1.28768	1.34841	0.901632
YIR031C	DAL7		0.79901	0.29071	-0.26527	0.61131	0.30756	-0.7734		1.73991	1.22324	0.832043	1.52765	1.23761	0.585037
YDR061W			0.79889	0.23436	-0.27367	0.30671	-0.40475	-0.68149		1.73976	1.17638	0.827213	1.23688	0.755367	0.623521
YIL155C	GUT2		0.79827	0.41585	0.29126	0.18311	0.6115	-0.59121		1.73901	1.33408	1.22371	1.13533	1.52785	0.663786
YGR146C	ECL1		0.7982	-0.34766	-0.32547	-0.11438	1.3698	-1.9609		1.73893	0.785858	0.798038	0.923779	2.58435	0.256868
YGL208W	SIP2		0.79793	0.31554	-0.049988	0.15556	-0.078634	-0.47478		1.7386	1.24448	0.965944	1.11385	0.946954	0.719577
YEL011W	GLC3		0.79768	0.56772	0.58982	0.68509	-0.21213	-1.6929		1.7383	1.48218	1.50506	1.6078	0.863262	0.309305
YER116C	SLX8		0.79754	0.10526	0.49391	0.30753	0.31668	-0.63215		1.73813	1.07569	1.40826	1.23759	1.24546	0.645214
YDL206W			0.79716	0.064843	0.17347	0.46158	0.063559	-1.0349		1.73768	1.04597	1.12777	1.37705	1.04504	0.48805
YGL250W	RMR1		0.79685	0.044446	0.40367	0.70601	0.13476	-1.1658		1.7373	1.03129	1.32287	1.63129	1.09791	0.445717
YLR389C	STE23		0.79658	-0.22025	0.4156	-0.011123	0.10143	-1.1443		1.73698	0.858417	1.33385	0.99232	1.07284	0.452409
YPL040C	ISM1		0.79636	0.28748	0.023491	0.24689	-0.070163	-0.60481		1.73671	1.22051	1.01642	1.18665	0.95253	0.657558
YBR107C	IML3		0.79617	-0.079271	0.37031	0.29953	0.69803	-0.49667		1.73649	0.946536	1.29263	1.23074	1.62229	0.708741
YHL014C	YLF2		0.79592	0.41668	0.11921	-0.21715	0.059839	-0.7426		1.73618	1.33485	1.08614	0.860263	1.04235	0.597661
YJL141C	YAK1		0.79421	0.0053341	-0.39231	-0.1494	0.14731	-0.76058		1.73413	1.0037	0.761909	0.901625	1.1075	0.590259
YGL104C	VPS73		0.79394	-0.31464	-0.040928	0.80685	-0.30916	-0.7372		1.7338	0.804052	0.972029	1.74939	0.807112	0.599903
YDL245C	HXT15		0.79231	-0.27486	-0.17549	0.25865	-0.82788	-0.015725		1.73185	0.826531	0.885467	1.19636	0.563356	0.989159
YHL002W	HSE1		0.79202	0.12574	-0.19331	0.66985	0.35426	-0.47335		1.7315	1.09107	0.874597	1.59091	1.27833	0.72029
YPR157W	TDA6		0.7914	0.11049	-0.06121	-0.09221	0.54837	0.73899		1.73075	1.07959	0.95846	0.938085	1.46243	1.66901
YOL159C			0.79069	-0.63588	0.22922	0.50115	0.72719	-0.71915		1.7299	0.643548	1.1722	1.41534	1.65541	0.607455
YLR345W			0.78998	0.7337	0.0062129	0.66277	-0.21111	-0.31436		1.72905	1.6629	1.00432	1.58312	0.863872	0.804208
YLR205C	HMX1		0.78952	-0.43993	0.15007	0.73468	1.2325	-0.43894		1.7285	0.73717	1.10962	1.66403	2.34974	0.737676
YMR094W	CTF13		0.78776	0.50699	1.6281	0.042427	-0.076554	-0.8958		1.72639	1.42108	3.09106	1.02984	0.94832	0.537449
YGR053C			0.78594	-0.18623	-0.26698	0.15058	-0.22093	-0.52596		1.72422	0.878899	0.831057	1.11002	0.858012	0.694497
YBR138C			0.7859	-0.34823	-0.58521	0.17852	0.0026523	-0.64022		1.72417	0.785547	0.666552	1.13172	1.00184	0.641615
YMR323W	ERR3		0.78555	0.14271	0.13919	2.2828	-0.40988	-0.34611		1.72375	1.10398	1.10129	4.86621	0.752686	0.786702
YGL226W	MTC3		0.7851	0.030201	0.049667	0.23036	0.18993	-0.86316		1.72321	1.02115	1.03503	1.17313	1.14071	0.549747
YML095C	RAD10		0.78489	-0.072703	0.091324	-0.21059	0.10222	-0.62632		1.72296	0.950855	1.06535	0.864184	1.07342	0.647827
YER159C	BUR6		0.7842	0.14836	0.1812	-0.19797	-0.31202	-0.58848		1.72214	1.10831	1.13383	0.871776	0.805513	0.665043
YDL222C	FMP45		0.78402	0.58181	1.2881	0.51458	1.6271	-0.11027		1.72192	1.49673	2.44206	1.42858	3.08891	0.926415
YHR124W	NDT80		0.78289	-0.12721	0.033136	-0.02735	0.56543	-1.3057		1.72057	0.9156	1.02323	0.981221	1.47983	0.404525
YDR171W	HSP42		0.78033	0.97655	0.14781	1.0846	-0.29756	-0.78324		1.71752	1.96775	1.10789	2.12079	0.813627	0.58106
YGR168C			0.77736	0.07534	-0.076832	0.54646	0.74337	-0.43896		1.71399	1.05361	0.948137	1.4605	1.67408	0.737666
YLR284C	ECI1		0.77724	-0.34469	-0.34867	0.12617	0.77996	1.0835		1.71385	0.787477	0.785308	1.09139	1.71708	2.11917
YGR031C-A	NAG1		0.77695	0.15125	-0.34252	0.37713	-0.2228	-0.61812		1.7135	1.11053	0.788663	1.29876	0.856901	0.651519
YLR147C	SMD3		0.77658	-0.71548	-0.75789	-0.28391	0.44748	-0.39607		1.71307	0.609002	0.591361	0.821362	1.36366	0.759926
YDR275W	BSC2		0.77614	0.19617	-0.042316	0.6734	0.11257	-1.002		1.71254	1.14565	0.971095	1.59483	1.08115	0.499307
YBL091C-A	SCS22		0.77542	0.040461	0.61322	0.32066	0.35931	-1.2265		1.71169	1.02844	1.52967	1.2489	1.28281	0.427353
YBR040W	FIG1		0.77532	0.13654	-0.47059	0.35063	0.57494	-0.56779		1.71157	1.09927	0.721669	1.27512	1.48962	0.674649
YMR118C	SHH3		0.77351	-0.12129	0.10512	-0.032584	0.82862	-1.3679		1.70942	0.919365	1.07558	0.977668	1.77599	0.387455
YGL116W	CDC20		0.77214	0.056421	-0.41491	0.10548	0.045688	-0.28319		1.7078	1.03988	0.750066	1.07585	1.03218	0.821772
YNR066C			0.77206	0.2656	1.3623	1.6963	-0.19546	1.1699		1.70771	1.20214	2.57095	3.24069	0.873294	2.24996
YLR457C	NBP1		0.77148	-0.37232	-0.16093	-0.33773	0.11321	-1.1058		1.70702	0.772539	0.894448	0.791285	1.08163	0.464645
YLR131C	ACE2		0.77066	-0.022254	-0.19136	0.17162	0.088365	-0.77273		1.70605	0.984693	0.87578	1.12632	1.06316	0.585309
YOR010C	TIR2		0.76908	0.2173	-0.72202	0.184	0.45152	-1.5356		1.70418	1.16256	0.606248	1.13603	1.36748	0.344936
YOR380W	RDR1		0.76776	-0.15893	0.095092	0.82695	0.34174	-1.1717		1.70262	0.895689	1.06813	1.77393	1.26728	0.443898
YPR193C	HPA2		0.76754	0.30339	0.89357	0.67466	0.73232	-0.16278		1.70236	1.23404	1.85777	1.59622	1.66131	0.893302
YPL281C	ERR2		0.76708	0.26504	0.26619	2.0573	-0.018148	0.41919		1.70182	1.20167	1.20263	4.16207	0.9875	1.33718
YDR151C	CTH1		0.76481	-0.20459	-0.065373	0.0064162	0.72435	-1.1939		1.69915	0.867785	0.955698	1.00446	1.65216	0.43712
YOR080W	DIA2		0.76378	-0.091921	-0.092348	0.77318	-0.0015166	-0.49466		1.69793	0.938273	0.937995	1.70903	0.998949	0.709729
YMR065W	KAR5		0.76359	-0.25915	-0.218	0.1551	0.42225	-0.27397		1.69771	0.83558	0.859756	1.1135	1.34002	0.827041
YDR119W-A	COX26		0.76323	-0.46491	-0.62041	0.077467	-1.4516	-1.7468		1.69729	0.724516	0.650486	1.05516	0.365616	0.297962
YAL067W-A			0.76318	-0.032531	0.54618	0.090287	-0.068152	0.17281		1.69723	0.977704	1.46021	1.06458	0.953859	1.12725
YOL071W	SDH5		0.76279	0.76114	0.749	0.70378	-0.4457	-0.34381		1.69677	1.69483	1.68063	1.62877	0.734228	0.787958
YLR289W	GUF1		0.76246	0.49786	0.14465	0.64352	-0.25676	-0.47337		1.69638	1.41212	1.10546	1.56214	0.836965	0.72028
YLR306W	UBC12		0.76222	0.5654	-0.021509	0.65704	-0.31127	-0.81471		1.6961	1.4798	0.985202	1.57684	0.805932	0.568523
YJL214W	HXT8		0.76116	0.011284	0.10935	0.11736	0.10505	-0.57591		1.69485	1.00785	1.07874	1.08475	1.07553	0.670863
YDR277C	MTH1		0.76082	0.14494	-0.1068	-0.68976	0.48908	0.072081		1.69445	1.10568	0.928646	0.619957	1.40355	1.05123
YJR047C	ANB1		0.76025	-0.87346	0.037848	-0.56125	0.86869	-0.96333		1.69378	0.545836	1.02658	0.677715	1.826	0.512872
YBR295W	PCA1		0.7592	0.16639	0.73002	1.0327	0.21342	-0.61907		1.69255	1.12225	1.65866	2.04585	1.15943	0.651091
YPR046W	MCM16		0.75878	-0.13751	-0.11872	0.19441	0.40302	-0.68227		1.69206	0.909087	0.921004	1.14426	1.32227	0.623184
YPL060W	MFM1		0.75646	0.54328	-0.16051	0.44261	-1.23	-0.24135		1.68934	1.45728	0.894709	1.35906	0.426317	0.845953
YDR022C	ATG31		0.75593	0.14933	-0.25004	0.589	-0.20196	-1.2419		1.68872	1.10905	0.840873	1.5042	0.869369	0.422815
YPR127W			0.75589	0.55217	0.45125	0.90412	0.26547	-0.96466		1.68867	1.46629	1.36722	1.8714	1.20203	0.512399
YDR314C	RAD34		0.75572	0.47244	-0.025045	0.11077	-0.48801	-0.69183		1.68847	1.38745	0.98279	1.0798	0.713008	0.619068
YOL101C	IZH4		0.75547	-0.88092	-1.043	0.54815	0.26043	-1.0366		1.68818	0.543021	0.485317	1.46221	1.19784	0.487475
YPL034W			0.7527	0.10845	-0.40112	0.36894	-0.23542	-1.6841		1.68494	1.07807	0.75727	1.2914	0.849438	0.311197
YKL125W	RRN3		0.75178	0.46563	-0.16127	0.82479	0.88454	-0.49304		1.68387	1.38092	0.894238	1.77128	1.84618	0.710526
YOL095C	HMI1		0.75104	-0.2967	-0.18729	-0.14555	-0.030461	-0.82069		1.68301	0.814112	0.878254	0.904035	0.979107	0.566171
YPL192C	PRM3		0.75084	0.15161	-0.30143	1.2012	1.7289	-1.2646		1.68277	1.11081	0.811448	2.29931	3.31475	0.416215
YIR024C	INA22		0.75064	-0.044293	-0.29624	-0.069514	-0.090796	-0.40399		1.68254	0.969765	0.814372	0.952959	0.939005	0.755765
YPL150W			0.74987	0.042926	-0.49757	0.2649	-0.10161	-1.1165		1.68164	1.0302	0.708299	1.20155	0.931992	0.461211
YHR161C	YAP1801		0.74952	0.37438	-0.1241	-0.018567	-0.2055	-0.20971		1.68123	1.29628	0.917576	0.987213	0.867238	0.864711
YGR238C	KEL2		0.74951	0.10386	-0.30093	-0.043164	0.23277	-0.42108		1.68122	1.07464	0.811729	0.970524	1.17509	0.746865
YBL029C-A			0.74835	0.1409	0.26464	0.052063	0.29549	-0.46673		1.67987	1.10259	1.20134	1.03675	1.2273	0.723603
YDL059C	RAD59		0.74806	-0.032456	-0.43854	-0.3058	0.2736	-0.64246		1.67953	0.977754	0.737881	0.808993	1.20882	0.64062
YNL293W	MSB3		0.74633	0.46397	0.54189	0.76354	0.14725	-0.22329		1.67752	1.37933	1.45588	1.69765	1.10746	0.85661
YDL110C	TMA17		0.74609	0.38983	0.33795	0.17201	-0.32069	0.13617		1.67724	1.31024	1.26396	1.12663	0.800687	1.09898
YBL074C	AAR2		0.74511	0.37677	-0.33558	0.1304	0.3644	-0.51936		1.6761	1.29843	0.792465	1.0946	1.28735	0.697681
YNL318C	HXT14		0.74272	0.19312	-0.066086	1.0207	0.37163	0.19631		1.67333	1.14323	0.955226	2.0289	1.29381	1.14576
YMR252C			0.74268	-0.29906	-0.49997	-0.91487	0.74588	-0.43933		1.67328	0.812782	0.707121	0.530392	1.677	0.737477
YFR046C	CNN1		0.7426	-0.28178	-0.23698	0.10792	0.048317	-1.0713		1.67319	0.822575	0.84852	1.07767	1.03406	0.47589
YEL019C	MMS21		0.74238	-0.24348	-0.11317	-0.50115	0.31806	-0.94867		1.67293	0.844705	0.924554	0.706543	1.24665	0.51811
YPR192W	AQY1		0.74034	0.24407	0.31816	0.43095	1.3505	0.56803		1.67057	1.18433	1.24674	1.34812	2.55	1.4825
YML036W	CGI121		0.73783	-0.42011	-0.039846	0.3957	-0.058791	-2.015		1.66767	0.747368	0.972759	1.31558	0.960068	0.247414
YMR287C	DSS1		0.7373	-0.21899	-0.53857	-0.37005	-0.43659	-0.78472		1.66705	0.859167	0.688453	0.773756	0.738879	0.580465
YKR004C	ECM9		0.73594	-0.29504	-0.15318	0.16719	0.31376	-1.0164		1.66548	0.81505	0.899266	1.12287	1.24294	0.494348
YMR232W	FUS2		0.73573	0.49445	0.39229	0.31564	0.49487	0.74011		1.66524	1.40878	1.31248	1.24456	1.40919	1.6703
YHL038C	CBP2		0.73426	-0.059751	-0.47886	0.062935	-0.22056	-0.10417		1.66354	0.95943	0.717544	1.04459	0.858232	0.93034
YER173W	RAD24		0.73177	0.31069	-0.15345	0.54519	0.12516	-0.88889		1.66068	1.2403	0.899098	1.45921	1.09063	0.540029
YDL057W			0.7316	0.37716	0.19992	0.32345	-0.38227	-0.98475		1.66048	1.29878	1.14863	1.25132	0.767229	0.505313
YCR032W	BPH1		0.73059	0.15707	-0.040055	1.2207	-0.17293	-0.37953		1.65932	1.11502	0.972618	2.3306	0.887039	0.768688
YJR096W			0.73059	-0.031268	-0.16748	0.45042	0.11171	-0.46852		1.65932	0.97856	0.890397	1.36644	1.08051	0.722706
YHR097C			0.72985	0.32515	0.46594	0.49594	0.30767	-0.068184		1.65847	1.25279	1.38122	1.41024	1.23771	0.953838
YJR110W	YMR1		0.72969	0.26799	-0.27308	0.54038	-0.23764	-0.78752		1.65828	1.20413	0.827551	1.45436	0.848132	0.579339
YOR220W	RCN2		0.72949	0.13478	-0.026275	0.64711	0.098501	-0.99142		1.65805	1.09793	0.981952	1.56603	1.07066	0.502982
YML047C	PRM6		0.72944	-0.14649	0.21334	0.074887	-0.46532	0.88656		1.658	0.903446	1.15937	1.05328	0.72431	1.84876
YEL059C-A	SOM1		0.72913	-0.8032	-0.26963	1.0305	-0.077386	-0.56276		1.65764	0.573077	0.829532	2.04273	0.947773	0.677006
YNR002C	ATO2		0.72664	0.35668	0.20594	1.1292	-0.096478	-0.16952		1.65478	1.28048	1.15344	2.18737	0.935314	0.889138
YGR016W			0.72557	0.33209	-0.052971	0.27703	0.30225	-0.61189		1.65355	1.25884	0.963949	1.2117	1.23307	0.654339
YGR283C			0.72487	-0.20642	0.50475	0.054392	0.46772	-1.4209		1.65275	0.866685	1.41888	1.03842	1.38292	0.373479
YHR178W	STB5		0.72464	0.15047	0.16319	0.86692	0.16352	-1.191		1.65249	1.10993	1.11976	1.82377	1.12002	0.437999
YIL134C-A			0.72355	0.20995	-0.26033	-0.17208	-0.048346	0.21793		1.65124	1.15665	0.834897	0.887562	0.967044	1.16306
YHR101C	BIG1		0.72058	0.30295	0.25057	-0.091945	0.45147	-0.61017		1.64784	1.23366	1.18968	0.938257	1.36743	0.65512
YLR298C	YHC1		0.72051	-0.35527	-0.30415	-0.24485	0.1989	-0.65235		1.64776	0.781723	0.809919	0.843904	1.14782	0.636243
YML054C	CYB2		0.72024	0.86395	0.54084	1.0071	0.52665	-0.6524		1.64746	1.82001	1.45482	2.00987	1.44058	0.636221
YDR305C	HNT2		0.72008	-0.094167	0.17895	0.12454	0.34426	-0.6113		1.64727	0.936813	1.13206	1.09016	1.2695	0.654607
YPL081W	RPS9A		0.71959	0.37892	0.59125	0.93153	0.34557	-0.76355		1.64671	1.30037	1.50655	1.9073	1.27065	0.589045
YDR034C	LYS14		0.71925	-0.24737	-0.51239	-0.026755	-0.64941	-0.30012		1.64633	0.842431	0.70106	0.981626	0.637541	0.812185
YKL011C	CCE1		0.71841	-0.23987	-0.085495	0.56973	0.019201	-1.0025		1.64537	0.846822	0.942461	1.48425	1.0134	0.499134
YIL077C			0.7179	-0.037151	-0.096267	0.34511	0.64253	-0.9558		1.64479	0.974578	0.93545	1.27025	1.56106	0.515556
YML103C	NUP188		0.7174	-0.58415	-0.42432	-0.24194	0.12935	-0.98944		1.64422	0.667042	0.74519	0.845607	1.0938	0.503673
YOR388C	FDH1		0.7165	-0.58954	-0.077767	1.0175	-0.15148	0.37713		1.64319	0.664555	0.947523	2.02441	0.900326	1.29876
YBR091C	TIM12		0.71571	-0.6681	-0.53458	-0.22217	0.98345	-1.6717		1.64229	0.629335	0.69036	0.857275	1.97719	0.313883
YIL164C	NIT1		0.71561	-0.37872	-0.25975	-0.12299	-0.06759	0.20609		1.64218	0.76912	0.835233	0.918283	0.954231	1.15356
YBR293W	VBA2		0.71546	-0.20689	0.026367	0.48513	0.3349	-0.69306		1.64201	0.866403	1.01844	1.39971	1.26129	0.618541
YPL167C	REV3		0.71464	-0.013552	-0.42658	0.42214	0.04279	-0.54796		1.64107	0.99065	0.744023	1.33991	1.0301	0.683987
YER051W	JHD1		0.71401	0.42541	-0.094064	0.52874	0.19967	-0.67594		1.64036	1.34295	0.93688	1.44267	1.14844	0.625924
YDR317W	HIM1		0.71391	0.22334	0.049392	0.33885	0.74916	-0.43666		1.64024	1.16743	1.03483	1.26475	1.68081	0.738843
YIL049W	DFG10		0.71356	0.24074	1.0374	0.78342	-0.11477	-0.57942		1.63985	1.1816	2.05253	1.72121	0.92353	0.669233
YLR318W	EST2		0.71317	-0.19121	0.029017	0.13821	-0.037852	-0.49107		1.6394	0.875871	1.02032	1.10054	0.974104	0.711497
YBL016W	FUS3		0.71304	-0.11942	0.30133	0.14009	-0.18207	-0.24545		1.63925	0.920558	1.23228	1.10197	0.881437	0.843553
YNL094W	APP1		0.71267	0.20418	0.23479	0.16969	0.29768	-0.72405		1.63883	1.15203	1.17674	1.12482	1.22917	0.605396
YML129C	COX14		0.71172	-0.031761	-0.48049	0.022938	0.52379	-0.66186		1.63776	0.978226	0.716734	1.01603	1.43773	0.632063
YIL132C	CSM2		0.71153	-0.14451	0.0027151	-0.37124	0.50934	-0.86481		1.63754	0.904687	1.00188	0.773118	1.4234	0.549119
YOR193W	PEX27		0.71022	-0.10979	0.15402	0.67995	0.48405	-0.46866		1.63605	0.926723	1.11267	1.60208	1.39866	0.722635
YNL103W	MET4		0.70987	0.17353	0.06421	0.11481	-0.14837	-0.12795		1.63566	1.12781	1.04551	1.08283	0.902269	0.915131
YOR368W	RAD17		0.70955	-0.11828	-0.49389	-0.33552	0.61618	-1.1035		1.63529	0.921285	0.710108	0.792498	1.53281	0.465386
YLL063C	AYT1		0.70889	-0.0061626	-0.17019	-0.6372	-0.19408	-0.40006		1.63455	0.995738	0.888726	0.64296	0.87413	0.757827
YLR283W			0.70818	0.051209	-0.14335	0.70993	0.078187	-0.77874		1.63374	1.03613	0.905414	1.63572	1.05569	0.582876
YPL196W	OXR1		0.70767	-0.025242	-0.4694	0.07563	-0.0182	-1.2732		1.63316	0.982656	0.722265	1.05382	0.987464	0.413741
YBR228W	SLX1		0.70755	-0.12914	-0.34945	0.5249	-0.0084307	-0.56514		1.63303	0.914376	0.784883	1.43883	0.994173	0.67589
YCR097W	HMRA1		0.70715	NaN	0.42612	-0.15515	-0.26574	0.99303		1.63258	N/A	1.34362	0.898039	0.831772	1.99036
YPL070W	MUK1		0.70714	0.45117	0.1056	0.69948	-0.31248	-0.39769		1.63256	1.36715	1.07594	1.62392	0.805256	0.759073
YLR204W	QRI5		0.7054	0.61272	-0.18106	0.75396	-0.11955	-1.0294		1.6306	1.52914	0.882055	1.68642	0.920475	0.489914
YPL168W	MRX4		0.7047	-0.08762	-0.43226	0.61138	0.036325	-1.3091		1.62981	0.941074	0.7411	1.52772	1.0255	0.403573
YMR112C	MED11		0.70463	-0.37663	-0.59822	0.03842	0.2962	-1.5715		1.62973	0.770235	0.660568	1.02699	1.22791	0.336458
YPL119C-A			0.7037	0.079148	-0.081523	0.071877	0.47792	-1.1727		1.62868	1.05639	0.945059	1.05108	1.39273	0.44359
YOL055C	THI20		0.70335	-0.23333	-0.066721	0.4543	0.43193	-0.70914		1.62828	0.850669	0.954806	1.37012	1.34904	0.611685
YBL018C	POP8		0.70302	-0.53279	0.28664	0.078355	0.45251	-1.411		1.62791	0.691217	1.2198	1.05581	1.36842	0.376051
YMR025W	CSI1		0.70119	-0.021933	-0.094443	0.50752	-0.08382	-0.58805		1.62585	0.984912	0.936634	1.4216	0.943556	0.665241
YMR019W	STB4		0.69915	0.2052	-0.26057	0.36896	-0.56154	-0.5503		1.62355	1.15285	0.834758	1.29142	0.677578	0.682878
YJL112W	MDV1		0.69883	0.21753	-0.47681	0.44983	-0.11324	-0.89504		1.62319	1.16274	0.718565	1.36588	0.924509	0.537732
YNR045W	PET494		0.69876	0.4939	0.24519	0.18354	-0.25852	-0.11623		1.62311	1.40825	1.18525	1.13567	0.835945	0.922595
YIL166C			0.69788	0.28675	0.19464	0.61091	0.34027	-0.73782		1.62212	1.21989	1.14444	1.52722	1.26599	0.599645
YJL137C	GLG2		0.69756	-0.26955	-0.012973	-0.70286	0.18702	-1.5881		1.62176	0.829578	0.991048	0.614353	1.13841	0.332609
YCL025C	AGP1		0.6972	-0.0819	-0.53782	0.36662	0.066333	0.29053		1.62135	0.944813	0.688811	1.28933	1.04705	1.22309
YMR265C			0.69632	-0.07566	-0.67043	0.37433	0.086822	-0.11292		1.62037	0.948908	0.628319	1.29624	1.06203	0.924715
YDL194W	SNF3		0.69443	0.39049	-0.25117	0.15222	-0.28829	-0.74248		1.61824	1.31084	0.840215	1.11128	0.818872	0.597711
YGR046W	TAM41		0.69352	0.14032	-0.064014	0.36384	-0.026688	-0.81258		1.61722	1.10215	0.956599	1.28685	0.981671	0.569363
YLR256W	HAP1		0.69254	0.44943	0.333	0.1399	-0.1418	-0.87776		1.61613	1.3655	1.25963	1.10183	0.906388	0.544212
YOL023W	IFM1		0.69164	0.7615	0.034529	0.40889	-0.41171	-0.80994		1.61512	1.69525	1.02422	1.32766	0.751732	0.570406
YPR159C-A			0.68979	0.44803	NaN	0.91694	-1.1459	NaN		1.61305	1.36418	N/A	1.88811	0.451908	N/A
YJL056C	ZAP1		0.68959	-0.22218	-0.065992	-0.29227	-0.010273	-0.43282		1.61283	0.857269	0.955288	0.816616	0.992905	0.740812
YLR121C	YPS3		0.68947	-0.31438	0.51828	0.28135	1.2416	0.6124		1.61269	0.804197	1.43225	1.21533	2.36461	1.5288
YFR012W	DCV1		0.68943	-0.27909	-0.67179	-0.35866	0.065893	-0.60469		1.61265	0.824111	0.627727	0.779889	1.04673	0.657613
YIR020C			0.68859	0.21149	-0.41111	-0.20551	0.40712	-0.71573		1.61171	1.15788	0.752045	0.867232	1.32604	0.608897
YER033C	ZRG8		0.68731	-0.031658	-0.046126	0.1203	-0.14078	-0.53379		1.61028	0.978295	0.968534	1.08696	0.907029	0.690738
YDR320C	SWA2		0.6861	-0.19571	-0.21381	-0.093989	0.41709	-1.1077		1.60893	0.873143	0.862257	0.936929	1.33523	0.464033
YGR239C	PEX21		0.68551	0.0028355	-0.21718	-0.087678	-0.30619	0.26722		1.60827	1.00197	0.860245	0.941036	0.808775	1.20349
YKR027W	BCH2		0.68488	-0.070355	-0.010579	0.36556	0.034758	-1.1167		1.60757	0.952404	0.992694	1.28838	1.02438	0.461147
YJL206C			0.68413	-0.47305	-0.19816	-0.28281	0.48267	-1.3045		1.60673	0.72044	0.871662	0.821988	1.39733	0.404861
YBR183W	YPC1		0.68237	0.03108	0.38963	1.2939	0.89842	-0.7958		1.60477	1.02178	1.31006	2.4519	1.86402	0.576024
YEL005C	VAB2		0.68218	-0.26751	-0.38096	-0.15309	0.096181	-0.3071		1.60456	0.830752	0.767926	0.899322	1.06894	0.808265
YER079W			0.682	0.29262	0.021224	0.68089	-0.40199	-0.2166		1.60436	1.22486	1.01482	1.60313	0.756814	0.860591
YLR127C	APC2		0.68198	-0.12704	-0.2239	0.13392	0.32665	-0.65077		1.60434	0.915708	0.856248	1.09727	1.2541	0.63694
YOL066C	RIB2		0.68184	-0.11854	-0.08889	0.10853	0.25248	-1.1994		1.60418	0.921119	0.940246	1.07813	1.19125	0.435456
YKR101W	SIR1		0.6813	0.29659	-0.25706	0.82325	-0.31836	-0.60241		1.60358	1.22824	0.836791	1.76939	0.801981	0.658653
YKR011C			0.68122	0.75708	0.17809	0.40716	-0.037294	-0.66041		1.6035	1.69007	1.13139	1.32607	0.974481	0.632698
YHL018W			0.68054	-0.061961	0.34852	0.17075	0.467	-0.92807		1.60274	0.957961	1.27325	1.12564	1.38223	0.525561
YGL003C	CDH1		0.68042	-0.30515	-0.36012	-0.058026	0.61574	-1.2548		1.60261	0.809358	0.7791	0.960578	1.53234	0.419052
YLR211C	ATG38		0.67958	-0.27181	0.079891	0.11836	-0.22024	-0.14039		1.60167	0.82828	1.05694	1.0855	0.858423	0.907274
YLR099C	ICT1		0.6783	-0.34812	0.21277	-0.1137	0.95696	-1.2715		1.60025	0.785607	1.15891	0.924215	1.94122	0.414229
YDR248C			0.67822	-0.42984	-0.41259	0.062749	0.25838	-1.8527		1.60016	0.742344	0.751273	1.04445	1.19613	0.276874
YNR049C	MSO1		0.67776	-0.1869	-0.36275	0.10287	0.015103	-0.96782		1.59965	0.878491	0.777681	1.07391	1.01052	0.511278
YBL101C	ECM21		0.67729	-0.017574	0.065531	-0.096049	-0.11368	-0.63821		1.59913	0.987893	1.04647	0.935592	0.924228	0.64251
YKL201C	MNN4		0.67728	-0.23704	-0.22298	0.13287	0.81528	-1.0174		1.59912	0.848484	0.856794	1.09647	1.75964	0.494006
YPL016W	SWI1		0.67672	0.46942	0.45806	-0.11269	-0.08808	-0.40725		1.5985	1.38455	1.37369	0.924862	0.940774	0.754059
YGL041C-B			0.67656	0.0059041	-0.47644	0.55205	0.31744	-0.57148		1.59832	1.0041	0.718749	1.46617	1.24612	0.672926
YBR280C	SAF1		0.6765	0.31631	0.13892	0.50281	-0.093899	-0.55483		1.59826	1.24514	1.10108	1.41697	0.936987	0.680737
YOL112W	MSB4		0.67646	0.22041	0.40679	0.79977	0.11266	-0.23941		1.59821	1.16506	1.32573	1.74082	1.08122	0.847092
YPL095C	EEB1		0.67559	-0.26157	-0.41483	0.4798	-0.05651	-1.145		1.59725	0.83418	0.750108	1.39455	0.961587	0.45219
YNL299W	TRF5		0.6752	0.036687	0.6365	0.11274	0.25187	-0.50842		1.59682	1.02576	1.55455	1.08128	1.19075	0.702992
YCR066W	RAD18		0.67345	0.1101	-0.23021	0.59736	-0.31182	-0.42325		1.59488	1.0793	0.852511	1.51295	0.805625	0.745743
YDR255C	RMD5		0.67334	0.34046	-0.01173	0.57849	0.79128	-0.41257		1.59476	1.26616	0.991902	1.49329	1.73061	0.751284
YJL133C-A			0.67327	0.8784	-0.31909	-0.026932	0.65064	-0.60608		1.59468	1.83834	0.801575	0.981505	1.56986	0.656979
YIR033W	MGA2		0.67324	-0.041544	-0.47879	0.46742	-0.60721	-0.97484		1.59465	0.971615	0.717579	1.38263	0.656465	0.508796
YDR021W	FAL1		0.67192	-0.40035	-0.72981	-0.24728	0.16886	-1.4387		1.59319	0.757674	0.602983	0.842483	1.12417	0.3689
YGL073W	HSF1		0.67148	0.35779	0.21046	0.37104	-0.16666	-0.61873		1.59271	1.28146	1.15706	1.29328	0.890903	0.651244
YER103W	SSA4		0.67147	1.6588	1.8329	1.7612	-0.1607	-0.31718		1.59269	3.15754	3.56252	3.3898	0.894591	0.802637
YLR437C	DIF1		0.67065	-0.74631	-0.2108	-0.59785	2.4143	-1.2327		1.59179	0.596126	0.864058	0.660738	5.33061	0.42552
YMR230W-A			0.67024	0.77906	-0.10113	NaN	0.6666	NaN		1.59134	1.71601	0.932302	N/A	1.58733	N/A
YMR041C	ARA2		0.6702	0.048795	-0.33318	-0.22185	0.62537	-0.37717		1.59129	1.0344	0.793785	0.857465	1.54261	0.769946
YMR039C	SUB1		0.67007	-0.45269	0.45533	-0.31471	-0.046418	-0.87145		1.59115	0.730679	1.3711	0.804013	0.968338	0.546597
YML068W	ITT1		0.66926	0.47906	-0.021955	0.57241	-0.128	-0.32905		1.59026	1.39384	0.984897	1.48701	0.915099	0.796061
YDR118W	APC4		0.66852	-0.093335	-0.33696	0.46719	0.31575	-0.50402		1.58944	0.937353	0.791708	1.38241	1.24466	0.705139
YOR274W	MOD5		0.66796	0.36656	-0.40696	-0.096538	-0.061116	-0.7508		1.58882	1.28927	0.754211	0.935275	0.958522	0.594274
YJR106W	ECM27		0.66762	-0.12674	0.14951	0.22407	0.23012	-0.80294		1.58845	0.915899	1.10919	1.16802	1.17293	0.57318
YMR294W	JNM1		0.6652	-0.072783	-0.43893	0.099715	-0.2191	-0.95532		1.58579	0.950802	0.737682	1.07156	0.859101	0.515727
YLR080W	EMP46		0.66471	0.39219	0.2217	0.68966	-0.31564	-0.67121		1.58525	1.31238	1.16611	1.6129	0.803494	0.62798
YBL059W			0.66296	0.27246	-0.25169	0.55894	0.19138	-1.3121		1.58333	1.20787	0.839912	1.47319	1.14186	0.402734
YBL080C	PET112		0.66165	0.31151	-0.1369	0.44863	-0.016731	-0.48196		1.58189	1.24101	0.909471	1.36474	0.98847	0.716004
YDR240C	SNU56		0.65887	-0.31829	-0.71351	-0.22139	1.4841	-0.56421		1.57885	0.80202	0.609835	0.857739	2.79743	0.676326
YJL180C	ATP12		0.65829	0.35446	0.088738	0.014752	0.068242	-0.52381		1.57821	1.27851	1.06344	1.01028	1.04844	0.695533
YHR022C			0.65731	0.25716	0.92261	-0.22588	0.7724	-1.7581		1.57714	1.19512	1.89554	0.855073	1.70811	0.295637
YGR201C			0.65714	-0.10002	0.67564	0.40557	0.69722	-1.4051		1.57695	0.93302	1.59731	1.32461	1.62138	0.377592
YJR021C	REC107		0.65657	0.22522	-0.17257	0.23499	0.29348	-0.99444		1.57633	1.16896	0.887261	1.1769	1.22559	0.501931
YBR214W	SDS24		0.65573	0.21243	0.5243	0.97624	-0.19627	-0.068816		1.57541	1.15864	1.43824	1.96733	0.872804	0.95342
YBR150C	TBS1		0.65555	0.19899	-0.28599	0.099925	0.164	-1.1627		1.57522	1.14789	0.820179	1.07172	1.12039	0.446676
YKL121W	DGR2		0.65549	-0.16231	-0.12429	0.12404	0.86544	-0.61648		1.57515	0.893593	0.917455	1.08978	1.8219	0.65226
YKL162C			0.65412	-0.14913	-0.33953	-0.1311	0.012947	0.074769		1.57366	0.901794	0.790299	0.913135	1.00901	1.05319
YOR387C			0.65401	0.11063	-0.14983	0.71231	-0.44617	-0.74419		1.57354	1.0797	0.901357	1.63843	0.733989	0.597003
YOR092W	ECM3		0.65342	-0.25923	0.16	0.14324	0.35739	-1.1138		1.57289	0.835534	1.11729	1.10438	1.28111	0.462075
YPR011C			0.65301	-0.14996	0.22108	-0.60751	0.27129	-1.6873		1.57245	0.901275	1.16561	0.656329	1.20689	0.310507
YLR152C			0.65234	0.040224	0.056828	0.81202	0.078401	-0.20722		1.57172	1.02827	1.04018	1.75567	1.05585	0.866205
YCL029C	BIK1		0.6513	-0.26248	-0.27588	0.067535	-0.075954	-0.76752		1.57058	0.833654	0.825946	1.04792	0.948715	0.587426
YBR018C	GAL7		0.64974	-0.35165	-0.35047	-0.5397	-0.10769	-0.56695		1.56889	0.783687	0.784329	0.687914	0.928073	0.675042
YDR419W	RAD30		0.64866	0.29486	-0.27616	0.25036	-0.078404	-0.61558		1.56771	1.22677	0.825786	1.1895	0.947105	0.652667
YBL064C	PRX1		0.64752	-0.070638	-0.027805	0.5536	0.18481	-0.85167		1.56647	0.952217	0.980912	1.46774	1.13667	0.554143
YER060W-A	FCY22		0.64557	-0.13826	-0.18398	0.074734	-0.32677	-0.3855		1.56436	0.908614	0.880271	1.05317	0.79732	0.765514
YJL209W	CBP1		0.6448	0.12268	-0.28176	0.39354	0.07731	-0.59606		1.56352	1.08876	0.822587	1.31361	1.05505	0.661558
YKR096W	ESL2		0.64453	0.33528	0.043987	0.27005	-0.3643	-0.81211		1.56323	1.26162	1.03096	1.20585	0.776846	0.569548
YIL105W-A			0.64447	-0.099105	-0.74542	0.043388	0.10351	-1.2048		1.56316	0.933612	0.596494	1.03053	1.07438	0.433829
YHR087W	RTC3		0.64432	0.16739	0.36024	0.75588	1.3903	-1.4581		1.563	1.12302	1.28364	1.68866	2.62133	0.363972
YGL166W	CUP2		0.64368	0.11621	-0.19654	0.22302	0.4811	-0.84814		1.56231	1.08388	0.872641	1.16717	1.39581	0.5555
YKL134C	2015-10-01		0.64327	0.19516	-0.054803	0.30514	0.37721	-0.67614		1.56187	1.14485	0.962726	1.23554	1.29883	0.625837
YDR183W	PLP1		0.64315	-0.40004	-0.59922	0.13263	-0.42472	-1.514		1.56174	0.757837	0.660111	1.09629	0.744983	0.350139
YDL238C	GUD1		0.64212	0.19939	-0.054684	0.45878	0.29056	-0.78743		1.56062	1.14821	0.962805	1.37438	1.22311	0.579375
YOL082W	ATG19		0.64179	-0.12326	-0.61494	0.47519	-0.5928	-0.989		1.56026	0.918111	0.652957	1.3901	0.663055	0.503827
YHR209W	CRG1		0.6416	0.36305	1.0055	1.4022	0.33865	-1.0929		1.56006	1.28614	2.00764	2.64304	1.26457	0.468818
YDL113C	ATG20		0.64053	0.012311	-0.46973	0.50009	0.0054586	-1.0595		1.5589	1.00857	0.7221	1.4143	1.00379	0.479798
YHR194W	MDM31		0.63995	0.10395	0.19852	0.50909	0.35478	-0.60318		1.55828	1.07471	1.14752	1.42315	1.27879	0.658301
YKR075C			0.63887	-0.4898	-0.73732	-1.561	1.25	-0.12381		1.55711	0.712124	0.599853	0.338916	2.37841	0.917761
YMR160W			0.63885	0.50495	0.23218	0.48368	-0.54339	-0.81261		1.55709	1.41907	1.17461	1.39831	0.686157	0.569351
YJL126W	NIT2		0.6377	0.16615	1.4898	0.51133	0.25921	-1.1455		1.55585	1.12206	2.8085	1.42536	1.19682	0.452033
YPR085C	ASA1		0.63633	-0.17547	-0.20777	0.41677	0.45518	-0.63786		1.55437	0.885479	0.865875	1.33494	1.37095	0.642666
YOL038C-A			0.63365	-0.80406	-0.052442	-0.21969	0.83679	-0.82808		1.55149	0.572735	0.964303	0.85875	1.78607	0.563278
YLR081W	GAL2		0.63353	0.30371	-0.1668	-0.3342	0.2654	-0.50337		1.55136	1.23431	0.890816	0.793224	1.20197	0.705457
YJR141W			0.63289	-0.23379	-0.3346	0.24282	0.18717	-1.7522		1.55067	0.850398	0.793004	1.1833	1.13853	0.296849
YDL048C	STP4		0.62988	-1.2323	-0.52791	-1.6632	1.0734	0.2657		1.54744	0.425638	0.693559	0.315738	2.10439	1.20222
YLL051C	FRE6		0.62981	0.061084	0.0026988	0.24014	0.45606	0.051119		1.54736	1.04325	1.00187	1.18111	1.37179	1.03607
YDL170W	UGA3		0.62962	0.026486	-0.27064	-0.21235	-1.1336	0.097512		1.54716	1.01853	0.828952	0.86313	0.455777	1.06993
YJL047C	RTT101		0.62931	0.067569	0.51132	-0.0066278	-0.029785	-0.52114		1.54683	1.04795	1.42535	0.995416	0.979566	0.696821
YOL001W	PHO80		0.62899	-0.32176	-0.24352	0.63965	0.34084	-1.3771		1.54648	0.800093	0.844682	1.55795	1.26649	0.384992
YDR066C	RTR2		0.62812	-0.17677	-0.46237	0.23135	0.068456	-1.4105		1.54555	0.884681	0.725793	1.17393	1.04859	0.376181
YNL275W	BOR1		0.62791	-0.36386	-0.26425	0.2781	0.64223	-1.3738		1.54532	0.777083	0.832631	1.2126	1.56074	0.385874
YJL187C	SWE1		0.62773	-0.44834	-0.31653	-0.17267	0.37724	-0.93007		1.54513	0.732886	0.802999	0.887199	1.29885	0.524833
YGR194C	XKS1		0.62749	0.2427	-0.091037	0.044454	0.0035505	-0.58322		1.54487	1.1832	0.938848	1.03129	1.00246	0.667472
YKL070W			0.62702	-0.19549	-0.82585	-0.20857	0.56726	-0.20314		1.54437	0.873276	0.56415	0.865395	1.48171	0.868658
YMR063W	RIM9		0.62666	0.017418	-0.24798	0.17163	0.023878	-0.14585		1.54399	1.01215	0.842075	1.12633	1.01669	0.903847
YFR035C			0.62559	-0.25931	0.20874	0.37748	0.62047	-3.0342		1.54284	0.835487	1.15568	1.29907	1.53738	0.122072
YGR076C	MRPL25		0.62516	0.111	-0.064045	0.3716	0.041158	-1.5115		1.54238	1.07998	0.956578	1.29379	1.02894	0.350746
YNR062C			0.6247	0.29382	-0.11927	0.24329	0.43231	-0.41941		1.54189	1.22588	0.920653	1.18369	1.34939	0.74773
YDL175C	AIR2		0.62405	0.23176	-0.46386	0.05662	0.015593	-1.5061		1.5412	1.17427	0.725044	1.04003	1.01087	0.352062
YKL217W	JEN1		0.62347	-0.62784	-0.82616	-0.06797	0.20532	-0.8563		1.54058	0.647145	0.564029	0.953979	1.15294	0.552367
YPL214C	THI6		0.62268	-0.18539	-0.16189	0.52635	0.37793	-0.94297		1.53973	0.879411	0.893853	1.44028	1.29948	0.520161
YGR140W	CBF2		0.62176	-0.10506	0.34018	0.021808	0.071324	-0.58985		1.53875	0.929766	1.26591	1.01523	1.05068	0.664412
YGL256W	ADH4		0.62081	-0.86613	-0.036838	-0.035796	0.36458	-1.4873		1.53774	0.548617	0.974789	0.975493	1.28751	0.356679
YML003W			0.6206	0.16638	-0.22951	0.18311	-0.28847	-0.63005		1.53751	1.12224	0.852925	1.13533	0.81877	0.646154
YOR211C	MGM1		0.62008	0.25756	-0.47092	0.0058673	0.17965	-0.55008		1.53696	1.19546	0.721504	1.00408	1.13261	0.682982
YCR024C	SLM5		0.62003	-0.098456	0.24517	0.32286	0.20445	-0.72194		1.53691	0.934032	1.18523	1.25081	1.15225	0.606282
YDR446W	ECM11		0.61909	-0.30984	-0.13043	0.29415	0.40855	NaN		1.53591	0.806731	0.913559	1.22616	1.32735	N/A
YNL331C	AAD14		0.61791	-0.29424	0.048182	0.1229	0.0034984	-0.75792		1.53465	0.815502	1.03396	1.08892	1.00243	0.591348
YLR390W	ECM19		0.61741	0.066606	0.44392	-0.1246	0.2246	-0.74978		1.53412	1.04725	1.3603	0.917258	1.16845	0.594694
YBR255W	MTC4		0.61736	0.13348	-0.17116	0.49911	-0.33681	-0.61114		1.53407	1.09694	0.888128	1.41334	0.79179	0.654679
YPL018W	CTF19		0.61705	-0.27093	0.091855	0.77496	0.34491	-0.44159		1.53374	0.828785	1.06574	1.71114	1.27007	0.736323
YPL213W	LEA1		0.61682	0.0012522	-0.40983	0.12983	-0.23908	-0.80556		1.53349	1.00087	0.752712	1.09416	0.847285	0.57214
YFR023W	PES4		0.61664	0.55952	-0.25773	0.636	-0.22518	0.046257		1.5333	1.47378	0.836403	1.55401	0.855488	1.03258
YFR043C	IRC6		0.61648	-0.29155	-0.40239	0.48733	0.12889	-1.1611		1.53313	0.817024	0.756604	1.40185	1.09345	0.447171
YMR111C			0.61485	-0.10944	-0.31718	-0.1888	0.43943	-0.47603		1.5314	0.926948	0.802637	0.877335	1.35607	0.718953
YPL123C	RNY1		0.61412	0.24727	0.41898	0.57376	-0.15975	-0.51815		1.53062	1.18696	1.33698	1.4884	0.89518	0.698267
YGL263W	COS12		0.61367	-0.18197	0.72742	-0.43032	-0.82856	0.72002		1.53015	0.881498	1.65568	0.742097	0.563091	1.6472
YPR083W	MDM36		0.61331	0.042796	-0.3179	0.10678	-0.43455	-0.41351		1.52976	1.03011	0.802237	1.07682	0.739925	0.750795
YPL249C	GYP5		0.61314	0.14035	0.33943	0.090216	0.055872	-0.75083		1.52958	1.10217	1.26526	1.06453	1.03949	0.594262
YJR084W			0.61265	0.14813	-0.35451	0.25307	-0.15399	-0.9284		1.52907	1.10813	0.782135	1.19174	0.898761	0.525441
YGR028W	MSP1		0.61257	0.11382	-0.19236	0.23395	-0.028914	-0.52998		1.52898	1.08209	0.875173	1.17605	0.980158	0.692564
YJR146W			0.61229	-0.37689	0.051679	-0.067779	0.26029	-0.99242		1.52868	0.770096	1.03647	0.954106	1.19772	0.502634
YKR076W	ECM4		0.61205	-0.34435	0.031542	1.2489	-0.33588	-0.65539		1.52843	0.787663	1.0221	2.3766	0.792301	0.634904
YER020W	GPA2		0.61203	0.11	-0.20681	0.23079	-0.45234	-0.88425		1.52841	1.07923	0.866451	1.17348	0.730856	0.541769
YIL006W	YIA6		0.6119	-0.20117	0.1169	0.032519	0.36477	-0.20482		1.52827	0.869845	1.0844	1.0228	1.28768	0.867647
YDR179C	CSN9		0.61161	-0.79544	-0.42568	-0.38925	-0.17506	-1.4958		1.52796	0.576167	0.744488	0.763526	0.885731	0.354584
YBR019C	GAL10		0.61124	-0.3822	-0.27958	-0.056914	0.3123	-0.58552		1.52757	0.767267	0.823831	0.961318	1.24169	0.666409
YDR058C	TGL2		0.6086	-0.12324	-0.53222	0.8849	0.021225	-0.72384		1.52478	0.918123	0.69149	1.84664	1.01482	0.605484
YHR002W	LEU5		0.60817	-0.19134	-0.41441	-0.1039	0.17786	-0.55074		1.52432	0.875792	0.750326	0.930514	1.1312	0.68267
YIL087C	AIM19		0.60808	0.2971	-0.15537	0.1314	0.44222	-0.92711		1.52423	1.22867	0.897902	1.09536	1.35869	0.525911
YOR058C	ASE1		0.60783	-0.44407	-0.56561	-0.21725	-0.082645	-0.77935		1.52397	0.735058	0.67567	0.860204	0.944325	0.582629
YGL255W	ZRT1		0.60719	0.36323	-0.28921	1.4085	2.1343	-2.0853		1.52329	1.2863	0.81835	2.65461	4.39024	0.235647
YPL055C	LGE1		0.60701	0.099975	0.87194	0.22236	0.20249	-0.75324		1.5231	1.07175	1.83012	1.16664	1.15068	0.59327
YOL096C	COQ3		0.60687	0.29541	-0.23993	0.15021	0.057574	-0.87866		1.52295	1.22723	0.846786	1.10973	1.04071	0.543872
YLR446W			0.60678	-0.25829	0.046162	0.35852	0.52955	-0.55606		1.52286	0.836078	1.03251	1.28211	1.44348	0.680157
YOR026W	BUB3		0.60593	0.31379	0.14658	0.58045	0.33457	-0.71537		1.52196	1.24297	1.10694	1.49532	1.261	0.609049
YDR316W	OMS1		0.60518	0.32955	-0.060614	0.20102	-0.33856	-1.0393		1.52117	1.25662	0.958856	1.14951	0.79083	0.486563
YNL011C			0.6051	-0.028815	0.043905	0.76307	0.70043	-0.70241		1.52108	0.980225	1.0309	1.6971	1.62499	0.614545
YMR100W	MUB1		0.60502	0.11535	-0.35906	0.13119	0.11465	-1.0345		1.521	1.08324	0.779672	1.0952	1.08271	0.488185
YJL103C	GSM1		0.605	0.11675	-0.11718	0.26105	0.19978	-0.35532		1.52098	1.08429	0.921988	1.19835	1.14852	0.781696
YHR168W	MTG2		0.6044	0.4035	0.37577	-0.044308	0.38371	-1.427		1.52035	1.32271	1.29753	0.969755	1.30469	0.371903
YFL056C	AAD6		0.60379	-0.53751	-0.28533	0.16883	0.087399	-1.2018		1.5197	0.688959	0.820554	1.12415	1.06245	0.434733
YAL047C	SPC72		0.60211	-0.39047	-0.48562	-0.31546	1.0942	-0.84588		1.51793	0.762881	0.71419	0.803595	2.13495	0.556371
YER035W	EDC2		0.60186	0.23405	0.11273	0.38155	-0.031174	-0.78596		1.51767	1.17613	1.08127	1.30274	0.978624	0.579966
YER038W-A			0.60157	-0.08334	-0.1588	0.031258	0.34544	-0.5379		1.51737	0.94387	0.89577	1.0219	1.27054	0.688773
YFR012W-A			0.59988	0.00968	-0.96659	0.26008	-0.13224	-0.50411		1.51559	1.00673	0.511714	1.19755	0.912414	0.705095
YGL262W			0.59985	0.2039	0.50684	-0.26106	NaN	0.47816		1.51556	1.15181	1.42093	0.834475	N/A	1.39297
YOR177C	MPC54		0.59945	0.19752	-0.20903	0.43173	-0.21909	-0.44791		1.51514	1.14673	0.865119	1.34885	0.859107	0.733104
YPL039W			0.59886	0.23504	-0.033787	-0.18219	0.16606	-0.86264		1.51452	1.17694	0.976853	0.881364	1.12199	0.549945
YMR001C	CDC5		0.59801	-0.16146	-0.68203	-0.098823	0.19835	-0.81541		1.51363	0.89412	0.623288	0.933795	1.14739	0.568247
YDR363W	ESC2		0.5978	0.21209	-0.45619	-0.018503	0.12145	-1.1019		1.51341	1.15837	0.728909	0.987257	1.08783	0.465903
YDR436W	PPZ2		0.59766	-0.27227	-0.23921	-0.25395	0.040126	-1.2804		1.51326	0.828016	0.847209	0.838597	1.0282	0.411681
YNL212W	VID27		0.59687	0.092466	-0.27029	0.52966	-0.028036	-1.7451		1.51243	1.06619	0.829153	1.44359	0.980755	0.298313
YBR217W	ATG12		0.59604	0.033769	0.0058782	0.44908	-0.13009	-0.41584		1.51156	1.02368	1.00408	1.36517	0.913774	0.749583
YFL050C	ALR2		0.59426	-0.036471	-0.25453	-0.089571	0.25353	-0.71493		1.5097	0.975037	0.83826	0.939802	1.19212	0.609235
YJL164C	TPK1		0.59365	0.086964	0.16378	0.095711	-0.45295	-1.1725		1.50906	1.06213	1.12022	1.06859	0.730548	0.443652
YPL140C	MKK2		0.59338	0.018911	-0.48584	0.32049	0.17928	-0.72453		1.50878	1.01319	0.714081	1.24875	1.13232	0.605194
YDL149W	ATG9		0.59296	0.59396	0.16603	0.5458	-0.1614	-0.77874		1.50834	1.50938	1.12197	1.45983	0.894157	0.582876
YIL093C	RSM25		0.59167	0.0050975	0.6995	-0.50113	-0.21206	-0.32132		1.50699	1.00354	1.62394	0.706553	0.863304	0.800337
YDL115C	IWR1		0.58973	-0.24514	-0.14595	0.080314	0.09701	-1.1264		1.50497	0.843734	0.903784	1.05725	1.06955	0.458057
YOR378W	AMF1		0.5894	-0.46011	-0.36412	0.034902	0.66398	-0.77017		1.50462	0.726931	0.776943	1.02449	1.58445	0.586348
YBR062C			0.58866	-0.25858	-0.10265	-0.17662	0.12691	-1.3943		1.50385	0.83591	0.931321	0.884773	1.09195	0.380429
YPL097W	MSY1		0.58826	0.27501	-0.31177	0.13288	-0.07831	-0.87704		1.50343	1.21	0.805653	1.09648	0.947167	0.544483
YIL111W	COX5B		0.58691	-0.0073577	-0.064606	0.17371	-0.044606	-1.8128		1.50203	0.994913	0.956206	1.12796	0.969555	0.284638
YGR006W	PRP18		0.58668	0.3661	-0.21913	0.11071	0.029167	-0.87777		1.50179	1.28886	0.859083	1.07976	1.02042	0.544208
YMR293C	HER2		0.58647	-0.27366	-0.47031	-0.4538	0.33647	-0.62414		1.50157	0.827218	0.721809	0.730117	1.26266	0.648806
YKL087C	CYT2		0.58626	0.40094	0.26507	-0.18008	0.27763	-0.40333		1.50135	1.32037	1.20169	0.882654	1.2122	0.756111
YMR253C			0.58602	-0.41198	-0.21592	-0.59424	0.73405	-0.48556		1.5011	0.751591	0.860997	0.662393	1.6633	0.71422
YNL227C	JJJ1		0.58486	0.00024937	1.1062	-0.18548	-0.078825	-0.68463		1.49989	1.00017	2.15278	0.879356	0.946828	0.622165
YLL022C	HIF1		0.58453	-0.59315	0.31956	-0.71096	0.34917	-1.224		1.49955	0.662894	1.24795	0.610913	1.27383	0.428094
YOR208W	PTP2		0.5833	-0.10379	0.58652	0.3088	0.37491	-0.54971		1.49827	0.930585	1.50162	1.23868	1.29676	0.683157
YOR377W	ATF1		0.5823	-0.197	-0.35308	0.39017	0.10307	-1.088		1.49723	0.872363	0.782911	1.31055	1.07406	0.470413
YGR243W	MPC3		0.58196	0.69951	0.1495	1.0355	0.16534	-0.65639		1.49688	1.62395	1.10918	2.04982	1.12143	0.634464
YJR107W			0.58086	0.038065	0.19137	0.32127	0.22398	-1.1661		1.49574	1.02674	1.14185	1.24943	1.16795	0.445624
YLR077W	FMP25		0.58082	0.29015	-0.38703	0.13153	-0.19462	-1.0033		1.4957	1.22277	0.764702	1.09545	0.873803	0.498858
YGL212W	VAM7		0.58018	0.51314	0.063837	0.44184	-0.33891	-0.57713		1.49504	1.42715	1.04524	1.35834	0.790638	0.670296
YNL314W	DAL82		0.58014	0.054341	-0.1913	0.19421	-0.23949	-0.54919		1.49499	1.03838	0.875816	1.1441	0.847045	0.683404
YKL133C			0.57968	0.10798	-0.22132	0.42797	0.36672	-0.71616		1.49452	1.07772	0.85778	1.34534	1.28942	0.608715
YPR094W	RDS3		0.57951	-0.51339	-0.53837	0.34133	0.33983	-2.1668		1.49434	0.700574	0.688548	1.26692	1.26561	0.222704
YOR258W	HNT3		0.57928	-0.37492	-0.61447	-0.34797	0.058928	-1.5256		1.4941	0.771148	0.65317	0.785689	1.04169	0.347335
YBR123C	TFC1		0.57864	-0.28932	0.37524	-0.025064	0.18255	-0.94908		1.49344	0.818288	1.29706	0.982777	1.13489	0.517963
YHR189W	PTH1		0.57829	-0.27278	0.05275	0.060506	0.82724	-0.33045		1.49308	0.827723	1.03724	1.04283	1.77429	0.795288
YPR047W	MSF1		0.57772	0.4654	0.011955	0.30576	-0.66831	-0.95414		1.49249	1.3807	1.00832	1.23607	0.629243	0.516149
YGL122C	NAB2		0.57754	-0.13916	-0.085699	-0.36098	0.40696	-1.2583		1.4923	0.908048	0.942328	0.778635	1.32589	0.418036
YML005W	TRM12		0.57537	-0.045723	-0.27899	0.30695	0.11263	-1.0631		1.49006	0.968804	0.824168	1.23709	1.0812	0.478603
YHR167W	THP2		0.57519	-0.078916	-0.52556	0.15263	0.26819	-1.1605		1.48987	0.946769	0.694689	1.11159	1.2043	0.447357
YHR213W-B			0.57509	0.041242	0.31184	0.51776	1.1194	0.53555		1.48977	1.029	1.24129	1.43173	2.17257	1.44949
YBL005W	PDR3		0.57394	0.42839	0.0070099	-0.10244	-0.30553	-1.1031		1.48858	1.34573	1.00487	0.931456	0.809145	0.465515
YOR276W	CAF20		0.57389	-0.56089	-0.32101	-0.048346	0.38107	-1.3695		1.48853	0.677884	0.800509	0.967044	1.30231	0.387025
YNL250W	RAD50		0.57304	0.0046243	-0.46301	0.1611	-0.46775	-0.69507		1.48766	1.00321	0.725471	1.11814	0.723091	0.617679
YDR501W	PLM2		0.57255	-0.7309	-0.25752	-0.26728	0.3335	-0.3354		1.48715	0.602528	0.836525	0.830885	1.26007	0.792564
YCL073C	GEX1		0.57194	-0.53736	-0.68316	-0.48827	-0.26721	-0.77307		1.48652	0.689031	0.6228	0.712879	0.830925	0.585171
YDR490C	PKH1		0.57177	-0.0044384	-0.1613	0.047252	0.39059	-0.57586		1.48635	0.996928	0.894219	1.03329	1.31093	0.670886
YIR039C	YPS6		0.57097	0.026885	0.76163	-0.36665	-0.32554	0.064813		1.48552	1.01881	1.69541	0.775581	0.798	1.04595
YDR254W	CHL4		0.57019	0.21458	-0.13845	0.41817	0.99849	-0.51948		1.48472	1.16037	0.908495	1.33623	1.99791	0.697623
YGR088W	CTT1		0.56829	-0.38132	0.042078	0.51787	1.4925	-0.42411		1.48277	0.767735	1.0296	1.43184	2.81376	0.745298
YMR104C	YPK2		0.56816	0.52065	1.0606	0.58142	0.48544	0.31304		1.48263	1.4346	2.0858	1.49632	1.40001	1.24232
YJR100C	AIM25		0.56671	-0.107	-0.53387	0.29265	0.10587	-1.1539		1.48114	0.928517	0.690699	1.22489	1.07614	0.449409
YPR100W	MRPL51		0.56461	0.001115	-0.16435	0.15353	0.08146	-1.3397		1.47899	1.00077	0.89233	1.11229	1.05809	0.395103
YLR091W	GEP5		0.56434	-0.09615	0.080032	0.28887	0.1395	-0.98449		1.47871	0.935526	1.05704	1.22168	1.10152	0.505404
YOR035C	SHE4		0.56426	-0.056013	-0.016173	0.17277	0.28475	-0.71108		1.47863	0.961919	0.988852	1.12722	1.2182	0.610863
YGL071W	AFT1		0.56319	0.26252	-0.36454	0.22211	0.37992	-0.82785		1.47753	1.19957	0.776716	1.16644	1.30127	0.563368
YJL046W	AIM22		0.56266	0.44634	0.1865	0.18087	-0.21789	-0.70138		1.47699	1.36258	1.138	1.13357	0.859822	0.614984
YOR128C	ADE2		0.56266	-0.39648	-0.18074	-0.39541	-0.47913	-1.4471		1.47699	0.75971	0.88225	0.760273	0.71741	0.366758
YDR185C	UPS3		0.56131	-0.16294	-0.094105	0.27823	1.0661	-1.3634		1.47561	0.893203	0.936853	1.21271	2.09377	0.388665
YER182W	FMP10		0.56057	0.75741	-0.26635	0.17416	-0.62254	-0.36005		1.47485	1.69045	0.83142	1.12831	0.649526	0.779138
YIR007W			0.56055	0.14913	0.34996	0.47836	-0.0033898	-0.90206		1.47483	1.1089	1.27453	1.39316	0.997653	0.535122
YGL007C-A			0.55894	-0.06858	NaN	NaN	0.55945	NaN		1.47319	0.953576	N/A	N/A	1.47371	N/A
YER041W	YEN1		0.55822	0.58217	-0.027187	0.26724	-0.10534	-0.43527		1.47245	1.4971	0.981332	1.2035	0.929586	0.739555
YMR198W	CIK1		0.55679	0.083499	0.029695	0.33265	-0.35708	-0.91946		1.47099	1.05958	1.0208	1.25932	0.780743	0.528707
YFR014C	CMK1		0.55641	-0.035078	-0.038497	-0.025776	-0.33564	-0.77223		1.47061	0.975979	0.973669	0.982292	0.792433	0.585512
YOL133W	HRT1		0.55585	-0.39513	-0.16885	0.1127	0.1274	-1.5742		1.47003	0.760421	0.889551	1.08125	1.09232	0.335829
YGR237C			0.55531	0.11369	-0.17776	-0.040095	-0.41982	-0.72571		1.46948	1.08199	0.884075	0.972591	0.747518	0.604699
YPL269W	KAR9		0.55528	0.15517	-0.39446	0.36316	-0.43837	-0.95271		1.46945	1.11355	0.760774	1.28624	0.737968	0.516661
YPL005W	AEP3		0.55503	0.37392	-0.176	0.50777	-0.093876	0.28107		1.4692	1.29587	0.885154	1.42185	0.937002	1.2151
YFL062W	COS4		0.55497	0.1243	0.49659	0.87872	-0.73749	-0.77293		1.46914	1.08998	1.41087	1.83874	0.599782	0.585228
YIL007C	NAS2		0.5548	-0.39569	-0.11283	0.17741	-0.060183	-1.397		1.46896	0.760126	0.924772	1.13085	0.959142	0.379718
YAR031W	PRM9		0.55448	-0.52564	-0.74384	-0.07872	0.67538	-0.94161		1.46864	0.694651	0.597148	0.946897	1.59702	0.520652
YEL023C			0.55436	0.14424	-0.33593	0.48465	0.31149	-0.66955		1.46852	1.10515	0.792273	1.39925	1.24099	0.628703
YKL071W			0.55406	0.048313	-0.51879	0.27713	0.27748	0.20534		1.46821	1.03406	0.697957	1.21178	1.21208	1.15296
YBR259W			0.55311	-0.27393	-0.044403	0.16481	0.028329	-0.65361		1.46725	0.827063	0.969691	1.12102	1.01983	0.635688
YML021C	UNG1		0.5529	-0.33256	-0.55734	-0.11705	0.40879	-0.72698		1.46703	0.794126	0.679554	0.922071	1.32757	0.604167
YNL073W	MSK1		0.55266	0.37263	0.28643	0.12462	-0.00076005	-0.79305		1.46679	1.29471	1.21962	1.09022	0.999473	0.577123
YOR292C			0.55181	-0.40431	-0.0037409	0.45627	0.84692	-1.0721		1.46592	0.755598	0.99741	1.37199	1.79866	0.475626
YCR038C	BUD5		0.55179	0.08242	-0.10873	-0.11055	0.16284	-0.71093		1.4659	1.05879	0.927404	0.926235	1.11949	0.610926
YCL068C			0.55079	0.21626	0.05121	0.16244	-0.00907	0.02832		1.46489	1.16172	1.03613	1.11918	0.993733	1.01982
YNL072W	RNH201		0.54972	-0.2659	-0.1611	-0.007966	0.41168	-0.66449		1.4638	0.83168	0.894343	0.994494	1.33023	0.630912
YOL138C	RTC1		0.54967	0.11549	0.25406	0.3043	0.15527	-0.56725		1.46375	1.08334	1.19256	1.23482	1.11363	0.674902
YDR295C	HDA2		0.54959	0.18868	-0.61433	0.20312	0.46291	-0.81937		1.46367	1.13972	0.653233	1.15119	1.37832	0.566689
YBR047W	FMP23		0.5492	0.74528	0.54745	0.84512	-1.9636	-0.89987		1.46327	1.6763	1.4615	1.79641	0.256388	0.535935
YOR018W	ROD1		0.54906	0.29083	0.11545	0.94838	-0.092708	-0.61181		1.46313	1.22334	1.08331	1.9297	0.937761	0.654375
YER104W	RTT105		0.54879	-0.13954	-0.2633	1.1258	0.42941	-0.38919		1.46286	0.907809	0.83318	2.18223	1.34668	0.763558
YER176W	ECM32		0.54857	0.080327	0.57379	0.29908	-0.41268	-0.78302		1.46264	1.05726	1.48843	1.23036	0.751227	0.581149
YCR089W	FIG2		0.54825	-0.40588	0.010935	0.50171	0.40423	1.2066		1.46231	0.754776	1.00761	1.41589	1.32338	2.30793
YDR243C	PRP28		0.54742	0.053198	-0.14153	-0.040114	0.91435	-0.82997		1.46147	1.03756	0.906557	0.972578	1.88472	0.562541
YLR189C	ATG26		0.54601	0.077598	-0.30644	0.29052	-0.14592	-0.54023		1.46004	1.05526	0.808635	1.22308	0.903803	0.687661
YBR156C	SLI15		0.54596	-0.2644	0.11639	0.21821	0.33926	-0.13627		1.45999	0.832545	1.08402	1.16329	1.26511	0.909869
YLR194C			0.54594	-0.67921	0.084409	0.1636	1.1006	-0.22012		1.45997	0.624507	1.06025	1.12008	2.14444	0.858494
YDR379W	RGA2		0.54546	0.3473	-0.11946	0.40999	-0.24114	-0.71058		1.45949	1.27218	0.920532	1.32868	0.846076	0.611074
YGL240W	DOC1		0.54524	-0.066371	0.24273	0.041582	0.14388	-0.6075		1.45926	0.955037	1.18323	1.02924	1.10487	0.656333
YOR111W			0.54518	-0.48482	-0.32106	0.29448	0.11823	-1.4556		1.4592	0.714586	0.800482	1.22644	1.0854	0.364603
YPL159C	PET20		0.54442	-0.46286	-0.29883	-0.31085	0.43785	-1.2247		1.45843	0.725547	0.812911	0.806167	1.35458	0.427886
YOR384W	FRE5		0.5441	-0.16191	-0.26851	-0.11291	0.50959	-0.34591		1.45811	0.893841	0.830177	0.924721	1.42365	0.786812
YLR046C			0.54381	-0.053041	-0.37508	0.6447	0.90732	-1.6564		1.45782	0.963902	0.771063	1.56341	1.87556	0.31723
YHR199C-A	NBL1		0.54377	-0.52223	-0.28478	-0.61377	0.85423	-1.376		1.45778	0.696295	0.820867	0.653487	1.80779	0.385286
YMR204C	INP1		0.54336	-0.10806	-0.40811	0.32503	-0.13562	0.2016		1.45736	0.927835	0.75361	1.25269	0.910279	1.14997
YHR034C	PIH1		0.54316	-0.34157	-0.4725	-0.0035854	0.35437	-0.68348		1.45716	0.789182	0.720715	0.997518	1.27843	0.622662
YDR462W	MRPL28		0.54289	0.33249	-0.069969	0.10832	-0.42169	-0.87668		1.45689	1.25918	0.952658	1.07797	0.74655	0.544619
YGR084C	MRP13		0.54254	0.096962	-0.26921	-0.22815	0.19463	-0.38932		1.45653	1.06952	0.829774	0.853729	1.14443	0.763489
YGR127W			0.54232	0.02393	-0.0042767	1.1228	0.17606	-1.0913		1.45631	1.01673	0.99704	2.17769	1.12979	0.469338
YIL154C	IMP2'		0.5419	-0.32943	0.75509	0.30516	0.0070655	-0.78799		1.45589	0.795851	1.68774	1.23556	1.00491	0.57915
YLL027W	ISA1		0.54165	0.87281	0.29631	-0.087577	-0.63945	0.33391		1.45564	1.83123	1.228	0.941102	0.641958	1.26042
YDL146W	LDB17		0.54115	-0.010679	0.27642	0.44249	-0.18659	-1.2732		1.45513	0.992625	1.21119	1.35895	0.87868	0.413741
YML029W	USA1		0.54091	0.15469	1.4234	-0.12338	-0.11905	-1.1412		1.45489	1.11318	2.68217	0.918034	0.920794	0.453382
YOR161C-C			0.53892	0.33586	-0.11762	0.6112	0.58419	-0.69524		1.45288	1.26213	0.921707	1.52753	1.4992	0.617607
YDR265W	PEX10		0.5389	0.25352	-0.39319	0.20153	-0.15542	-0.93459		1.45286	1.19211	0.761444	1.14992	0.897871	0.523191
YML050W	AIM32		0.53853	0.20978	-0.22631	0.4942	0.10186	-0.72758		1.45249	1.15651	0.854818	1.40854	1.07316	0.603916
YIL146C	ATG32		0.53815	-0.20079	-0.29348	0.095556	0.35498	-0.45436		1.45211	0.870074	0.815932	1.06848	1.27897	0.729834
YNR064C			0.53632	0.31818	0.30618	0.29237	0.19864	0.035292		1.45027	1.24676	1.23643	1.22465	1.14762	1.02476
YCL038C	ATG22		0.53456	-0.15684	0.19982	1.1597	0.60316	-0.99665		1.4485	0.896988	1.14856	2.23411	1.51904	0.501162
YLR393W	ATP10		0.53436	0.1728	-0.17417	-0.0028825	0.12781	-0.61532		1.4483	1.12724	0.886277	0.998004	1.09263	0.652785
YBR278W	DPB3		0.53256	-0.416	-0.32926	0.053757	-0.14719	-1.3696		1.44649	0.7495	0.795945	1.03796	0.903008	0.386999
YJL090C	DPB11		0.53231	-0.28005	-0.34195	-0.20278	0.33853	-0.60495		1.44624	0.823562	0.788974	0.868875	1.26447	0.657494
YLR090W	XDJ1		0.53215	0.48482	-0.26679	0.22852	-0.56356	-0.64258		1.44608	1.39941	0.831167	1.17163	0.67663	0.640566
YMR283C	RIT1		0.53184	-0.10331	-0.16007	0.084913	0.16037	-1.1043		1.44577	0.930895	0.894982	1.06062	1.11757	0.465128
YAR064W			0.53165	-0.21111	0.17213	0.49551	1.1999	0.31912		1.44558	0.863872	1.12672	1.40982	2.29724	1.24757
YDR374C	PHO92		0.53157	-0.22432	0.48654	0.40005	0.21556	0.7813		1.4455	0.855998	1.40108	1.31955	1.16115	1.71868
YGR040W	KSS1		0.53083	-0.15301	-0.27165	0.22751	0.41815	-0.74798		1.44476	0.899372	0.828372	1.17081	1.33621	0.595437
YNL294C	RIM21		0.53043	0.096335	0.46636	0.36804	0.41734	0.27048		1.44436	1.06905	1.38162	1.2906	1.33546	1.20621
YDR485C	VPS72		0.53015	-0.30022	-0.37924	-0.07247	-0.13242	-0.9642		1.44408	0.812129	0.768843	0.951008	0.9123	0.512563
YNL259C	ATX1		0.53013	-0.24242	-0.82337	-0.56843	0.74023	-2.2543		1.44406	0.845326	0.56512	0.67435	1.67044	0.209598
YML041C	VPS71		0.52991	-0.29547	-0.30388	0.094512	0.40178	-1.1062		1.44384	0.814807	0.810071	1.0677	1.32114	0.464516
YHL010C	ETP1		0.52978	0.256	1.0798	0.26313	0.39248	-0.58604		1.44371	1.19416	2.11374	1.20008	1.31265	0.666169
YDR132C			0.52974	-0.3199	-0.30176	-0.24967	-0.69647	-1.3498		1.44367	0.801125	0.811262	0.841089	0.61708	0.392346
YPR075C	OPY2		0.52924	-0.33904	-0.23019	-0.035076	0.53575	-0.41856		1.44317	0.790567	0.852523	0.97598	1.4497	0.748171
YNL097C-B			0.52849	-1.0528	-0.02587	-0.47972	0.40549	-0.74607		1.44242	0.482032	0.982228	0.717117	1.32454	0.596226
YML053C			0.52842	-0.21284	-0.36862	-0.30883	0.12238	-0.92423		1.44235	0.862837	0.774523	0.807296	1.08853	0.526962
YBR161W	CSH1		0.52834	-0.15529	0.17797	0.40417	0.30861	-1.4557		1.44227	0.897952	1.13129	1.32333	1.23851	0.364578
YNR020C	ATP23		0.52833	0.061261	-0.2647	-0.50099	0.36996	-0.2677		1.44226	1.04338	0.832372	0.706622	1.29232	0.830643
YIL144W	NDC80		0.52811	0.24827	-0.049714	0.40527	-0.25615	-0.91955		1.44204	1.18778	0.966128	1.32434	0.837319	0.528674
YNL148C	ALF1		0.52783	0.051116	0.56748	-0.057573	0.11591	-1.0073		1.44176	1.03607	1.48193	0.960879	1.08366	0.497476
YCR073C	SSK22		0.52751	0.041548	0.0601	0.88254	0.64248	-0.19625		1.44144	1.02922	1.04254	1.84362	1.56101	0.872816
YLR006C	SSK1		0.52725	-0.072951	-0.04075	0.12828	0.23937	-0.53042		1.44118	0.950691	0.972149	1.09299	1.18048	0.692353
YDL080C	THI3		0.52707	0.20789	-0.15213	0.1163	0.050324	-0.64186		1.441	1.155	0.899921	1.08395	1.0355	0.640886
YMR154C	RIM13		0.52642	-0.22356	-0.17547	-0.09792	0.36001	-0.68274		1.44035	0.856449	0.885479	0.934379	1.28343	0.622981
YDR387C			0.52584	-0.34478	-0.083487	0.42046	0.96182	-0.42207		1.43977	0.787428	0.943774	1.33835	1.94777	0.746353
YLR057W	MNL2		0.52565	-0.052384	-0.088062	0.26773	-0.0054044	-0.51841		1.43958	0.964341	0.940786	1.20391	0.996261	0.698141
YPL198W	RPL7B		0.52563	0.5875	0.60938	0.76252	0.40822	-1.475		1.43956	1.50264	1.5256	1.69645	1.32705	0.359733
YLR425W	TUS1		0.52546	0.14607	-0.15152	0.22135	1.1825	-0.83506		1.43939	1.10655	0.900301	1.16582	2.2697	0.56056
YJL063C	MRPL8		0.52542	0.26932	0.56313	0.01408	0.13604	-1.2493		1.43935	1.20524	1.47747	1.00981	1.09888	0.420652
YLR145W	RMP1		0.52515	-0.081569	-0.33872	0.096485	-0.055447	-1.2354		1.43908	0.945029	0.790743	1.06917	0.962296	0.424725
YIL046W	MET30		0.52484	0.3474	-0.16587	0.26368	0.086616	-0.8947		1.43877	1.27227	0.891391	1.20054	1.06188	0.537859
YDR475C	JIP4		0.5244	0.30621	0.17769	0.25383	-0.12172	-0.89377		1.43834	1.23646	1.13107	1.19237	0.919091	0.538206
YLR288C	MEC3		0.52421	-0.15652	-0.25114	0.056576	0.23873	-0.63752		1.43815	0.897187	0.840232	1.03999	1.17995	0.642817
YIL108W			0.52406	0.34496	0.81968	0.83748	0.41677	-0.5944		1.438	1.27012	1.76501	1.78693	1.33494	0.66232
YEL018W	EAF5		0.52357	-0.0036501	-0.46237	-0.19436	-0.17726	-0.81173		1.43751	0.997473	0.725793	0.873961	0.884381	0.569698
YDR256C	CTA1		0.52349	-0.35044	-0.069458	0.26115	1.6261	-0.26438		1.43743	0.784345	0.952996	1.19843	3.08677	0.832556
YJL003W	COX16		0.52336	-0.24065	-0.72933	0.36767	-0.26342	-1.9286		1.4373	0.846364	0.603184	1.29027	0.833111	0.262684
YNL006W	LST8		0.52329	0.31078	0.022189	0.36039	0.22087	-1.6028		1.43723	1.24038	1.0155	1.28377	1.16544	0.329237
YHL035C	VMR1		0.52296	0.37554	0.61614	0.80827	0.17466	-0.18689		1.4369	1.29733	1.53277	1.75111	1.1287	0.878497
YJL083W	TAX4		0.52249	-0.18694	0.48542	-0.47871	0.35238	-1.1689		1.43643	0.878467	1.39999	0.717619	1.27666	0.44476
YPL149W	ATG5		0.52006	-0.20442	-0.10883	0.29535	0.71934	-1.5169		1.43401	0.867888	0.92734	1.22718	1.64643	0.349436
YNL037C	IDH1		0.51994	0.64367	0.48088	0.14632	0.3789	-2.3085		1.4339	1.5623	1.39559	1.10674	1.30035	0.20187
YMR014W	BUD22		0.51908	-0.43532	-0.50115	-0.081424	0.33411	-0.7241		1.43304	0.73953	0.706543	0.945124	1.2606	0.605375
YKL210W	UBA1		0.5181	-0.094602	-0.092975	0.28157	-0.24688	-1.421		1.43207	0.936531	0.937587	1.21552	0.842717	0.373453
YNL200C			0.51757	-0.2585	-0.03852	0.036848	0.046791	-0.55083		1.43154	0.835957	0.973653	1.02587	1.03296	0.682627
YMR274C	RCE1		0.51731	-0.64546	-0.078978	-0.23679	0.63066	-1.2827		1.43128	0.639289	0.946728	0.848631	1.54827	0.411026
YOR353C	SOG2		0.51718	0.10328	-0.31202	0.28962	0.15756	-0.65674		1.43116	1.07421	0.805513	1.22232	1.1154	0.63431
YNL162W-A			0.51698	0.15139	0.14947	0.24063	0.62228	-0.94254		1.43096	1.11064	1.10916	1.18151	1.53931	0.520316
YDR067C	OCA6		0.51696	-0.3299	-0.49359	-0.17805	-0.1202	-0.72884		1.43094	0.795592	0.710255	0.883897	0.92006	0.603389
YBR225W			0.51644	0.19243	0.04688	0.22961	-0.05414	-0.62214		1.43042	1.14269	1.03303	1.17252	0.963168	0.649706
YHR150W	PEX28		0.51625	0.40317	-0.16959	0.42785	-0.19392	-0.6239		1.43023	1.32241	0.889095	1.34523	0.874227	0.648914
YNL025C	SSN8		0.51595	-0.27102	-0.34879	-0.31505	0.52849	-1.4381		1.42994	0.828733	0.785242	0.803823	1.44242	0.369053
YMR182W-A			0.51543	0.53167	-0.0081443	0.22579	0.22663	-1.7864		1.42942	1.4456	0.994371	1.16942	1.1701	0.289895
YLR007W	NSE1		0.51402	0.18282	-0.13233	0.82728	0.33442	-0.77248		1.42802	1.1351	0.912357	1.77434	1.26087	0.58541
YOL087C	DUF1		0.51399	0.11745	-0.23782	0.41188	-0.12375	-0.65017		1.42799	1.08482	0.848026	1.33042	0.917799	0.637205
YGL144C	ROG1		0.51351	-0.37439	-0.4208	0.18729	0.50882	-0.93362		1.42752	0.771432	0.74701	1.13862	1.42289	0.523543
YIL003W	CFD1		0.51287	-0.19085	-0.53361	0.22897	-0.58186	-0.55295		1.42689	0.876089	0.690824	1.172	0.668102	0.681625
YOR299W	BUD7		0.51174	0.30548	0.17159	0.54871	0.18226	-0.96439		1.42577	1.23583	1.1263	1.46278	1.13466	0.512495
YJL155C	FBP26		0.51099	0.29993	0.18029	0.49703	0.30671	-0.26586		1.42503	1.23108	1.13311	1.41131	1.23688	0.831703
YGL178W	MPT5		0.51083	-0.42324	0.16664	-0.15861	0.42767	-0.37983		1.42487	0.745748	1.12244	0.895888	1.34506	0.768528
YDL087C	LUC7		0.51078	-0.31232	-0.26184	0.09318	0.33901	-0.76963		1.42482	0.805346	0.834024	1.06672	1.26489	0.586568
YIL122W	POG1		0.51071	-0.043778	-0.13454	-0.24614	0.51434	-0.0932		1.42475	0.970111	0.91096	0.843149	1.42834	0.937441
YPR158W	CUR1		0.5107	0.39794	0.0009998	0.87495	0.5318	-1.3605		1.42474	1.31763	1.00069	1.83394	1.44573	0.389447
YLR107W	REX3		0.51047	0.056253	-0.22551	0.13971	0.1947	-0.33308		1.42451	1.03976	0.855293	1.10168	1.14449	0.79384
YLR362W	STE11		0.5102	0.20318	-0.44351	0.4252	-0.070486	-0.26724		1.42425	1.15123	0.735343	1.34276	0.952317	0.830908
YPL248C	GAL4		0.50996	-0.012388	-0.24257	0.25295	0.5795	-0.59562		1.42401	0.99145	0.845238	1.19164	1.49433	0.66176
YOR062C			0.50947	0.13874	-0.10804	0.17084	1.0155	-0.28739		1.42353	1.10094	0.927848	1.12571	2.0216	0.819383
YGL193C			0.50899	-0.0070678	-0.18853	0.68548	0.63365	-1.01		1.42305	0.995113	0.877499	1.60824	1.55149	0.496546
YPL052W	OAZ1		0.50842	-0.40947	0.29214	0.47399	0.13503	-0.51893		1.42249	0.7529	1.22446	1.38895	1.09812	0.697889
YBL043W	ECM13		0.50839	-0.35472	0.031342	-0.19601	-0.42695	1.5305		1.42246	0.782021	1.02196	0.872962	0.743833	2.88886
YCR019W	MAK32		0.5079	0.23972	-0.45937	0.96955	0.13679	-0.46587		1.42198	1.18076	0.727304	1.95823	1.09946	0.724034
YFL042C			0.50754	0.14788	0.28826	0.27795	-0.33016	-0.76299		1.42162	1.10794	1.22117	1.21247	0.795448	0.589274
YLR028C	ADE16		0.50709	-0.37674	-0.30615	-0.43344	-0.44957	-1.0828		1.42118	0.770176	0.808797	0.740494	0.732261	0.472112
YMR097C	MTG1		0.50614	-0.099824	-0.5555	0.097022	-0.015412	-0.7259		1.42025	0.933147	0.680421	1.06956	0.989374	0.60462
YBR043C	QDR3		0.50488	-0.33683	-0.24641	-0.057984	-0.28529	0.20943		1.41901	0.791779	0.842992	0.960606	0.820577	1.15623
YKR098C	UBP11		0.50439	0.15925	-0.33884	0.0019148	0.046725	-0.069714		1.41852	1.11671	0.790677	1.00133	1.03292	0.952827
YBR211C	AME1		0.5043	-0.41934	-0.63972	-0.37449	0.54426	-1.2026		1.41843	0.747767	0.641838	0.771378	1.45827	0.434492
YHR171W	ATG7		0.50326	0.25598	-0.23627	0.24107	-0.075526	-1.0018		1.41741	1.19415	0.848937	1.18187	0.948996	0.499377
YOL086W-A	MHF1		0.50264	0.25244	-0.2968	0.42406	0.044117	-1.1155		1.4168	1.19122	0.814056	1.3417	1.03105	0.461531
YPL133C	RDS2		0.50124	-0.23466	-0.28142	-0.21156	0.53288	-0.95276		1.41543	0.849885	0.822781	0.863603	1.44681	0.516643
YCR003W	MRPL32		0.50108	0.70595	-0.1228	1.1564	-0.11797	-0.4079		1.41527	1.63122	0.918403	2.22901	0.921483	0.75372
YFL021W	GAT1		0.5009	-0.85005	-0.67952	-0.15419	0.58981	-0.17056		1.4151	0.554766	0.624373	0.898637	1.50505	0.888498
YKR021W	ALY1		0.50061	-0.037536	-0.086552	-0.10105	-0.20076	-0.74672		1.41481	0.974318	0.941771	0.932354	0.870092	0.595957
YPL100W	ATG21		0.5004	0.25051	-0.36109	0.70573	-0.04942	-0.98965		1.41461	1.18963	0.778576	1.63097	0.966325	0.5036
YDR146C	SWI5		0.50024	-0.41364	-0.77348	-0.23918	-0.23247	-0.99536		1.41445	0.750727	0.585005	0.847227	0.851176	0.501611
YDR330W	UBX5		0.50013	0.64718	0.10641	0.31147	-0.48615	-0.45128		1.41434	1.5661	1.07655	1.24097	0.713928	0.731394
YLR085C	ARP6		0.50001	-0.35342	-0.28504	-0.15406	0.16048	-1.0048		1.41422	0.782726	0.820719	0.898718	1.11766	0.498339
YNL158W	PGA1		0.49886	0.099931	-0.10997	0.0363	0.11233	-0.32826		1.4131	1.07172	0.926607	1.02548	1.08097	0.796497
YKL142W	MRP8		0.49807	0.29085	-0.1344	0.86239	-0.14537	-1.4251		1.41232	1.22336	0.911049	1.81805	0.904147	0.372394
YOR219C	STE13		0.49796	-0.041919	-0.24432	0.22741	0.37023	-0.71149		1.41222	0.971362	0.844214	1.17073	1.29256	0.610689
YPR066W	UBA3		0.49766	-0.60271	-0.51908	-0.2717	-0.039042	-0.99573		1.41192	0.658516	0.697817	0.828343	0.973301	0.501482
YJR035W	RAD26		0.49753	0.19611	-0.11872	0.33314	-0.44136	-0.59488		1.41179	1.14561	0.921004	1.25975	0.73644	0.6621
YKL222C			0.49745	-0.095016	-0.26099	-0.065793	0.1813	-0.5221		1.41172	0.936262	0.834515	0.95542	1.13391	0.696357
YEL006W	YEA6		0.49732	-0.26535	-0.091879	-0.31913	-0.13575	-1.8523		1.41159	0.831997	0.9383	0.801553	0.910197	0.27695
YHL020C	OPI1		0.49726	0.063747	0.24856	-0.11635	0.148	-0.5352		1.41153	1.04518	1.18802	0.922519	1.10803	0.690063
YLR266C	PDR8		0.49677	-0.14851	-0.45095	-0.11589	0.47242	-0.79265		1.41105	0.902182	0.731561	0.922813	1.38743	0.577283
YKR106W	GEX2		0.49635	-0.75663	-0.76515	-0.45142	-0.2832	-0.86245		1.41064	0.591877	0.588392	0.731323	0.821766	0.550018
YER093C	TSC11		0.49603	0.13604	-0.19433	-0.18173	0.067946	-0.56662		1.41033	1.09888	0.873979	0.881645	1.04822	0.675197
YKL167C	MRP49		0.49523	-0.48926	-0.3846	-0.4731	0.16507	-2.0161		1.40955	0.71239	0.765991	0.720415	1.12122	0.247226
YDL123W	SNA4		0.49506	-0.045882	0.17659	0.10491	0.10424	-0.45773		1.40938	0.968697	1.13021	1.07543	1.07493	0.728131
YDR459C	PFA5		0.49494	-1.0144	-0.48225	-0.36574	0.8356	-1.0468		1.40926	0.495034	0.71586	0.776071	1.7846	0.484041
YNL336W	COS1		0.49461	0.094826	0.53365	0.89776	-0.97021	-0.68779		1.40894	1.06794	1.44759	1.86317	0.510432	0.620804
YDR460W	TFB3		0.49459	-0.37987	-0.50494	0.101	-0.16225	-1.0315		1.40892	0.768507	0.70469	1.07252	0.89363	0.489201
YLR356W	ATG33		0.49296	-0.13687	0.14068	0.2617	0.24163	-0.58587		1.40733	0.90949	1.10242	1.19889	1.18233	0.666247
YNL213C	RRG9		0.49296	-0.16711	-0.17601	-0.077977	0.19132	-0.96559		1.40733	0.890625	0.885148	0.947385	1.14181	0.512069
YDR438W	THI74		0.49241	0.22029	-0.41871	0.38827	0.46761	-1.3055		1.40679	1.16497	0.748093	1.30882	1.38282	0.404581
YMR030W-A			0.49224	0.19126	0.54771	0.62526	0.21647	0.19876		1.40663	1.14176	1.46176	1.54249	1.16189	1.14771
YPL233W	NSL1		0.49211	0.15619	0.93703	0.18878	0.3975	-0.7236		1.4065	1.11434	1.91458	1.1398	1.31722	0.605584
YPL014W			0.49202	-0.67273	-0.20046	-0.47855	0.94468	0.048601		1.40641	0.627318	0.870273	0.717699	1.92476	1.03426
YCL004W	PGS1		0.49163	-0.14349	-0.10717	0.67826	0.28454	-1.1676		1.40603	0.905326	0.928407	1.60021	1.21802	0.445161
YJL077W-B			0.49144	0.0038746	0.074272	0.36323	0.067346	-0.22687		1.40585	1.00269	1.05283	1.2863	1.04779	0.854487
YBL025W	RRN10		0.49109	0.20733	-0.16919	0.32523	0.38205	-0.69291		1.40551	1.15455	0.889342	1.25286	1.30319	0.618605
YER130C	COM2		0.48994	-0.19116	-0.22322	0.24878	0.61848	-0.46479		1.40439	0.875901	0.856651	1.1882	1.53526	0.724577
YGL125W	MET13		0.48963	-0.91593	0.081554	0.38201	-0.36595	0.64538		1.40408	0.530002	1.05816	1.30316	0.775958	1.56415
YGR096W	TPC1		0.48907	-0.37098	0.1243	0.14008	0.69933	-0.96358		1.40354	0.773257	1.08998	1.10197	1.62375	0.512783
YLR417W	VPS36		0.48749	0.10598	-0.24295	-0.099109	1.2001	-0.55687		1.402	1.07623	0.845016	0.933609	2.29756	0.679775
YNL274C	GOR1		0.48631	-0.23595	-0.401	1.7067	0.14053	-0.82542		1.40086	0.849126	0.757333	3.26413	1.10231	0.564318
YDR229W	IVY1		0.48622	0.10439	-0.30375	0.086651	0.67456	-0.78881		1.40077	1.07504	0.810144	1.0619	1.59611	0.578821
YGR166W	TRS65		0.48434	0.05513	0.92389	0.53759	0.33292	-0.49921		1.39895	1.03895	1.89722	1.45155	1.25956	0.707494
YHR067W	HTD2		0.48322	-0.092091	0.0021835	-0.2129	-0.24358	-1.4099		1.39786	0.938162	1.00151	0.862801	0.844647	0.376338
YBR180W	DTR1		0.48307	0.36523	-0.43697	-0.037368	-0.19947	-0.63779		1.39771	1.28809	0.738684	0.974431	0.87087	0.642697
YDR482C	CWC21		0.48298	-0.68329	-0.48679	-0.41756	0.16621	-0.84029		1.39763	0.622744	0.713611	0.74869	1.12211	0.558531
YPR082C	DIB1		0.48242	-0.5305	-0.41771	-0.76183	0.4744	-1.2847		1.39709	0.692315	0.748612	0.589748	1.38934	0.410456
YPR154W	PIN3		0.48203	-0.022275	0.20434	0.15669	0.16392	-0.57098		1.39671	0.984679	1.15216	1.11473	1.12033	0.673159
YPL024W	RMI1		0.48194	0.032547	-0.33395	0.4729	1.1492	-0.22746		1.39662	1.02282	0.793361	1.3879	2.21791	0.854137
YKR078W			0.48181	0.34105	-0.21406	0.3305	-0.13788	-0.3335		1.39649	1.26668	0.862108	1.25745	0.908854	0.793609
YNL309W	STB1		0.4815	-0.18928	0.11102	-0.28476	0.012836	-0.51991		1.39619	0.877043	1.07999	0.820878	1.00894	0.697415
YPL076W	GPI2		0.48133	-0.94602	-0.67569	-0.4745	-0.35219	-0.99821		1.39603	0.519062	0.626033	0.719716	0.783394	0.500621
YGL248W	PDE1		0.4808	0.18961	0.4884	0.49693	-0.21667	-0.31102		1.39552	1.14046	1.40289	1.41121	0.860549	0.806072
YOR033C	EXO1		0.48063	-0.54152	-0.2285	0.82904	0.65351	-0.7112		1.39535	0.687047	0.853522	1.7765	1.57299	0.610812
YDR332W	IRC3		0.48018	0.10819	-0.33033	0.64693	-0.30445	-0.9149		1.39492	1.07788	0.795355	1.56583	0.809751	0.530381
YLR148W	PEP3		0.48007	-0.083723	-0.28986	0.22668	-0.2471	-1.3297		1.39481	0.943619	0.817981	1.17014	0.842588	0.397851
YDR065W	RRG1		0.47978	0.25221	-0.21688	0.0081651	0.14737	-0.58675		1.39453	1.19103	0.860424	1.00568	1.10755	0.665841
YLR299W	ECM38		0.47922	0.010714	-0.017713	0.69572	-0.15013	-0.35953		1.39399	1.00745	0.987797	1.61969	0.901169	0.779418
YLR432W	IMD3		0.47921	-0.36568	0.74577	0.83364	0.63168	-2.2714		1.39398	0.776103	1.67687	1.78218	1.54937	0.207129
YOR363C	PIP2		0.47906	-0.25694	-0.030224	-0.013376	0.050656	-0.66047		1.39384	0.836861	0.979268	0.990771	1.03574	0.632672
YKL061W	BLI1		0.47892	0.03009	-0.30161	0.36778	-0.35868	0.70141		1.3937	1.02108	0.811346	1.29037	0.779878	1.62609
YKL168C	KKQ8		0.47874	0.010062	-0.3889	0.066075	0.26574	-0.92336		1.39353	1.007	0.763712	1.04686	1.20225	0.52728
YOR052C	TMC1		0.47766	-0.25407	-0.05226	-0.17976	0.49794	-0.89887		1.39248	0.838527	0.964424	0.88285	1.4122	0.536307
YGR129W	SYF2		0.47765	0.12032	-0.12798	0.21866	-0.10409	-1.1457		1.39247	1.08698	0.915112	1.16365	0.930392	0.45197
YGR108W	CLB1		0.47758	-0.49153	-0.99613	0.21069	-0.30528	-1.5754		1.39241	0.71127	0.501343	1.15724	0.809285	0.33555
YLR119W	SRN2		0.47743	-0.39094	-0.49161	0.099781	-0.18536	-1.3741		1.39226	0.762633	0.711231	1.07161	0.87943	0.385793
YBR103W	SIF2		0.47594	0.014182	0.25259	0.33247	-0.20486	-1.1632		1.39082	1.00988	1.19134	1.25917	0.867623	0.446521
YOR348C	PUT4		0.47572	-0.6346	-0.48974	-0.25011	1.8338	0.3527		1.39061	0.644119	0.712153	0.840832	3.56475	1.27695
YBL060W	YEL1		0.47566	0.27645	-0.15283	0.34549	0.1666	-0.75861		1.39055	1.21121	0.899484	1.27058	1.12241	0.591066
YDL091C	UBX3		0.47561	0.11118	-0.30196	0.23417	-0.15149	-0.91606		1.39051	1.08011	0.81115	1.17623	0.90032	0.529954
YNL261W	ORC5		0.47462	-0.025207	0.25811	0.47108	-0.25242	-0.77885		1.38955	0.98268	1.19591	1.38615	0.839487	0.582831
YKL197C	PEX1		0.47415	-0.017539	0.065728	-0.07391	0.25889	-0.66351		1.3891	0.987916	1.04661	0.95006	1.19656	0.63134
YKR020W	VPS51		0.47355	-0.52792	0.061962	0.0016431	-0.44087	-1.4619		1.38852	0.693554	1.04388	1.00114	0.73669	0.363015
YHL021C	AIM17		0.4734	-0.13653	0.16954	0.18981	-0.60976	-0.8195		1.38838	0.909705	1.1247	1.14061	0.655306	0.566638
YFL049W	SWP82		0.47319	0.089879	-0.22295	0.25702	-0.088239	-0.77829		1.38818	1.06428	0.856812	1.19501	0.94067	0.583057
YDL233W	MFG1		0.47305	0.063037	0.15545	0.2703	-0.010785	-1.2009		1.38804	1.04466	1.11377	1.20606	0.992552	0.435004
YNL023C	FAP1		0.47274	0.014163	-0.13935	0.016936	0.40114	-0.745		1.38774	1.00987	0.907928	1.01181	1.32055	0.596668
YJL036W	SNX4		0.47031	0.19619	-0.095946	0.31679	-0.27738	-0.88902		1.38541	1.14567	0.935659	1.24556	0.825088	0.539981
YOR060C	SLD7		0.47013	-0.20142	-0.45911	-0.54235	0.45651	-0.41764		1.38523	0.869694	0.727435	0.686652	1.37222	0.748648
YML062C	MFT1		0.46988	-0.43769	-0.47603	-0.16571	-0.11908	-0.3905		1.38499	0.738316	0.718953	0.89149	0.920775	0.762865
YBR196C-A			0.46985	-0.26094	0.46996	0.93503	0.92573	-0.92491		1.38497	0.834544	1.38507	1.91193	1.89965	0.526713
YMR056C	AAC1		0.46918	-0.47484	-0.23154	0.34768	0.41744	-1.0635		1.38432	0.719547	0.851725	1.27251	1.33556	0.47847
YOR231W	MKK1		0.46842	-0.20879	0.034178	0.18141	0.23254	-1.2866		1.38359	0.865263	1.02397	1.13399	1.1749	0.409916
YDR079W	PET100		0.46812	0.30212	0.035845	0.16088	-0.63618	-2.0435		1.38331	1.23295	1.02516	1.11797	0.643414	0.242575
YER007W	PAC2		0.46775	-0.0025776	-0.3221	-0.0050241	-0.085597	-1.1627		1.38295	0.998215	0.799905	0.996524	0.942394	0.446676
YDL025C	RTK1		0.46716	0.20642	-0.01489	0.084509	-1.2804	0.28944		1.38239	1.15382	0.989732	1.06033	0.411681	1.22217
YOR105W			0.46672	0.1567	0.06139	0.26249	0.15836	-0.67916		1.38196	1.11473	1.04347	1.19955	1.11602	0.624529
YNL278W	CAF120		0.46664	-0.17419	-0.076085	-0.26511	0.17219	-0.87071		1.38189	0.886265	0.948628	0.832135	1.12677	0.546878
YHR116W	COX23		0.46516	1.0445	0.33063	0.064636	0.029199	-0.2559		1.38047	2.06265	1.25756	1.04582	1.02045	0.837465
YNR063W			0.4643	0.18348	-0.056859	-0.14735	-0.087985	0.12275		1.37965	1.13562	0.961355	0.902907	0.940836	1.08881
YPR040W	TIP41		0.46409	0.13858	0.091445	0.066467	-0.22425	-0.71383		1.37945	1.10082	1.06544	1.04715	0.85604	0.609699
YER038C	KRE29		0.46399	-0.5187	-0.34135	-0.094737	0.039395	-1.0239		1.37935	0.698001	0.789302	0.936443	1.02768	0.491785
YLR348C	DIC1		0.46352	-0.70357	-0.062821	-0.2918	0.71959	-1.7773		1.3789	0.614051	0.95739	0.816882	1.64671	0.291729
YDR453C	TSA2		0.46263	-0.76005	0.20905	0.46519	1.5473	-0.71941		1.37805	0.590476	1.15593	1.3805	2.9227	0.607346
YOL115W	PAP2		0.46245	-0.021419	-0.2292	0.1345	-0.012397	-1.0032		1.37788	0.985263	0.853108	1.09771	0.991444	0.498892
YDR421W	ARO80		0.4618	0.27469	0.018139	1.0898	0.35823	-0.069529		1.37726	1.20973	1.01265	2.12845	1.28185	0.952949
YLR270W	DCS1		0.46178	0.50845	0.1379	0.6307	-0.12921	-1.4634		1.37724	1.42252	1.1003	1.54832	0.914332	0.362637
YBR237W	PRP5		0.46166	0.37815	-0.098459	0.34286	-0.11339	-0.42542		1.37713	1.29967	0.93403	1.26827	0.924413	0.744622
YDR486C	VPS60		0.46117	-0.090359	-0.20439	-0.14261	-0.039705	-0.89863		1.37666	0.939289	0.867906	0.905879	0.972854	0.536396
YLR047C	FRE8		0.4605	-0.13978	-0.13768	0.22091	0.66025	-0.69171		1.37602	0.907658	0.90898	1.16547	1.58036	0.61912
YMR244C-A	COA6		0.4602	-0.10513	0.088166	-0.31688	0.052646	-0.47704		1.37573	0.929721	1.06302	0.802804	1.03717	0.71845
YNL218W	MGS1		0.45975	0.52462	0.064986	0.53647	0.45677	-1.1513		1.3753	1.43855	1.04607	1.45042	1.37247	0.450219
YJL131C	AIM23		0.4595	0.33528	-0.47317	-0.21348	-0.17771	-0.38851		1.37507	1.26162	0.72038	0.862454	0.884105	0.763918
YML020W			0.45947	-0.047842	-0.16826	0.2528	-0.068132	-0.63066		1.37504	0.967382	0.889915	1.19152	0.953872	0.645881
YNR006W	VPS27		0.45902	0.51205	0.066195	0.47011	-0.1991	-0.11581		1.37461	1.42608	1.04695	1.38522	0.871094	0.922864
YHR036W	BRL1		0.45766	0.10866	-0.32305	0.50068	0.48734	-0.61735		1.37331	1.07823	0.799378	1.41488	1.40186	0.651867
YDR499W	LCD1		0.45682	0.26127	-0.30374	0.070136	-0.2738	-0.63519		1.37251	1.19853	0.810149	1.04982	0.827138	0.643856
YDR362C	TFC6		0.45654	-0.06837	-0.46606	-0.13089	0.23542	-1.037		1.37225	0.953715	0.723939	0.913268	1.17725	0.48734
YDL107W	MSS2		0.45627	0.35583	0.090883	0.38103	-0.09561	-0.63129		1.37199	1.27972	1.06502	1.30227	0.935876	0.645599
YMR262W			0.45618	0.062774	-0.18751	0.27359	-0.28428	-0.87858		1.3719	1.04447	0.87812	1.20881	0.821151	0.543903
YJL165C	HAL5		0.45596	-0.22896	-0.34875	-0.13023	0.35149	-0.96693		1.3717	0.85325	0.785264	0.913686	1.27588	0.511594
YDR040C	ENA1		0.45573	0.86052	0.70768	-0.60036	1.0031	-0.43356		1.37148	1.81569	1.63318	0.659589	2.0043	0.740432
YMR257C	PET111		0.45548	-0.30992	-0.32837	-0.12977	0.12875	-1.3999		1.37124	0.806686	0.796436	0.913977	1.09335	0.378955
YLR102C	APC9		0.45478	-0.10127	-0.3418	0.6842	0.13073	-0.35309		1.37057	0.932212	0.789056	1.60681	1.09485	0.782905
YOR114W			0.45449	-0.64754	-0.39003	0.10942	-0.24029	-0.18946		1.3703	0.638368	0.763114	1.07879	0.846575	0.876934
YDL130W-A	STF1		0.45444	0.57481	0.48451	0.66841	-0.68017	0.42521		1.37025	1.48948	1.39911	1.58932	0.624092	1.34277
YHR059W	FYV4		0.45444	0.36013	-0.11908	0.84885	0.1623	-0.94768		1.37025	1.28354	0.920775	1.80106	1.11907	0.518466
YEL076C			0.45416	0.4179	0.3639	-0.53983	0.21337	-0.71792		1.36998	1.33598	1.2869	0.687852	1.15939	0.607973
YER109C	FLO8		0.4538	0.032251	-0.35035	-0.096451	0.3794	-0.79286		1.36964	1.02261	0.784394	0.935331	1.3008	0.577199
YOR113W	AZF1		0.45363	0.35756	-0.061866	0.52032	-0.4176	-0.030964		1.36948	1.28126	0.958024	1.43427	0.748669	0.978766
YBR108W	AIM3		0.45356	0.17385	0.060779	0.2538	-0.33459	-1.272		1.36942	1.12806	1.04303	1.19234	0.793009	0.414085
YGL064C	MRH4		0.45346	0.13623	-0.42785	-0.017344	0.37006	-0.31271		1.36932	1.09903	0.743369	0.98805	1.29241	0.805128
YBR231C	SWC5		0.45342	-0.2474	1.0626	-0.24446	0.25548	0.28031		1.36928	0.842413	2.08869	0.844132	1.19373	1.21446
YIR002C	MPH1		0.45262	0.1299	-0.053457	0.13039	0.096193	-0.56136		1.36852	1.09422	0.963625	1.09459	1.06895	0.677663
YMR280C	CAT8		0.4519	-0.094943	-0.47425	0.81516	-0.36329	-0.072015		1.36784	0.936309	0.719841	1.75949	0.77739	0.951308
YNR010W	CSE2		0.4519	-0.17407	-0.05334	0.24482	0.084447	-1.077		1.36784	0.886339	0.963703	1.18494	1.06028	0.474013
YLR133W	CKI1		0.45183	0.35647	0.10227	0.2613	-0.063805	-0.90422		1.36777	1.28029	1.07346	1.19856	0.956737	0.534322
YEL044W	IES6		0.45175	-0.15532	-0.71596	0.16946	-0.20663	-1.2198		1.3677	0.897933	0.6088	1.12464	0.866559	0.429342
YKL001C	MET14		0.45157	-0.65965	-0.72291	-0.10926	0.4808	-1.3416		1.36753	0.633032	0.605874	0.927063	1.39552	0.394583
YMR191W	SPG5		0.45136	0.025438	0.036924	0.72856	0.57013	-0.35946		1.36733	1.01779	1.02592	1.65698	1.48466	0.779456
YLR134W	PDC5		0.45086	0.063868	0.59345	0.45983	0.085852	-1.0063		1.36685	1.04526	1.50885	1.37538	1.06131	0.497821
YGR133W	PEX4		0.45074	0.098445	0.099519	0.23812	0.28464	-0.49134		1.36674	1.07062	1.07142	1.17945	1.21811	0.711364
YDR371W	CTS2		0.45017	-0.0016774	-0.37803	0.45841	0.083943	-1.2441		1.3662	0.998838	0.769488	1.37403	1.05991	0.422171
YLR168C	UPS2		0.44921	0.39507	0.032812	0.17347	0.26565	-0.26421		1.36529	1.31501	1.023	1.12777	1.20218	0.832655
YPL021W	ECM23		0.44829	0.31195	0.23066	0.64102	0.25787	0.52447		1.36442	1.24138	1.17337	1.55943	1.19571	1.43841
YKL101W	HSL1		0.44817	0.9626	1.797	0.7641	0.13984	-0.50755		1.36431	1.94882	3.47497	1.69831	1.10178	0.703416
YOR090C	PTC5		0.44734	-0.04422	0.58035	-0.14547	0.070266	-1.0557		1.36352	0.969814	1.49521	0.904085	1.04991	0.481064
YDR092W	UBC13		0.44717	-0.05134	-0.1649	0.27705	0.037267	-1.649		1.36336	0.96504	0.89199	1.21171	1.02617	0.318861
YGL154C	LYS5		0.4462	-0.55167	-0.23391	0.25907	0.15603	-0.41914		1.36245	0.68223	0.850327	1.19671	1.11422	0.74787
YDL027C	MRX9		0.44619	-0.012001	-0.16013	0.092412	-0.060973	-0.67096		1.36244	0.991716	0.894944	1.06615	0.958617	0.628089
YGL197W	MDS3		0.44604	0.062825	0.082639	0.43663	0.11778	-0.83257		1.3623	1.04451	1.05895	1.35344	1.08506	0.561528
YDR202C	RAV2		0.44536	-0.2226	-0.61616	0.41332	-0.20723	-1.3323		1.36165	0.85702	0.652405	1.33175	0.866199	0.397135
YPL134C	ODC1		0.44474	0.14844	-0.37626	-0.7743	0.54472	-1.3518		1.36107	1.10837	0.770432	0.584672	1.45874	0.391803
YPL174C	NIP100		0.44378	-0.058723	-0.27838	0.074852	0.0038454	-0.42253		1.36016	0.960114	0.824516	1.05325	1.00267	0.746115
YPR166C	MRP2		0.44378	-0.36287	-0.46933	0.035994	0.66435	-2.1044		1.36016	0.777616	0.7223	1.02526	1.58485	0.232548
YDR405W	MRP20		0.44316	0.73806	0.2269	0.091058	-0.44636	-0.45092		1.35958	1.66793	1.17032	1.06515	0.733892	0.731576
YOR233W	KIN4		0.4416	0.016542	-0.44176	-0.061608	0.23795	-0.59069		1.35811	1.01153	0.736236	0.958196	1.17932	0.664025
YPR025C	CCL1		0.44139	-0.49304	-0.46003	-0.1373	0.22414	-0.78547		1.35791	0.710526	0.726971	0.909219	1.16808	0.580163
YBR152W	SPP381		0.44124	-0.026829	-0.42842	-0.036262	-0.42439	-0.9851		1.35777	0.981575	0.743075	0.975178	0.745154	0.505191
YDR147W	EKI1		0.44113	-0.010234	-0.45319	0.43792	0.1383	-0.8931		1.35767	0.992931	0.730426	1.35465	1.10061	0.538456
YKL068W-A			0.44022	-0.31387	-0.18045	-0.44232	0.31132	-2.2792		1.35681	0.804481	0.882428	0.73595	1.24084	0.206012
YHR006W	STP2		0.43995	0.259	0.10091	0.54801	-0.20645	-0.25593		1.35656	1.19665	1.07245	1.46207	0.866667	0.837447
YAR018C	KIN3		0.43993	-0.38762	-0.66003	0.12217	1.2	-0.91318		1.35654	0.76439	0.632865	1.08837	2.2974	0.531013
YPR096C			0.43993	-0.26318	-0.1815	0.2069	0.4291	0.34088		1.35654	0.833249	0.881786	1.15421	1.34639	1.26653
YFR019W	FAB1		0.43966	0.59605	0.16409	0.37822	-0.52778	-0.37642		1.35628	1.51157	1.12046	1.29974	0.693621	0.770347
YHR159W	TDA11		0.43927	0.29008	-0.032957	0.33998	0.051575	-0.65583		1.35592	1.22271	0.977415	1.26574	1.0364	0.63471
YNL269W	BSC4		0.4388	0.0408	0.04509	0.22044	0.67203	-0.0041049		1.35548	1.02868	1.03175	1.16509	1.59331	0.997159
YMR020W	FMS1		0.43856	0.25628	0.28312	0.42669	-0.11049	-1.2782		1.35525	1.19439	1.21682	1.34415	0.926273	0.41231
YDR439W	LRS4		0.43843	-0.16926	-0.42212	0.22527	-0.37592	-0.79812		1.35513	0.889299	0.746327	1.169	0.770614	0.575098
YDR511W	SDH7		0.43824	-0.050249	-0.065852	-0.11804	-0.13475	-1.4668		1.35495	0.96577	0.955381	0.921439	0.910828	0.361784
YGR240C-A			0.43812	-0.27342	-0.44078	0.19957	-0.21084	-1.4701		1.35484	0.827356	0.736736	1.14836	0.864034	0.360957
YOL009C	MDM12		0.43651	-0.37377	-0.37155	-0.5774	0.2653	-0.51686		1.35333	0.771763	0.772952	0.67017	1.20189	0.698891
YPL051W	ARL3		0.43643	-0.4	-0.6165	0.037383	-0.18662	-1.3377		1.35325	0.757858	0.652251	1.02625	0.878662	0.395651
YPR185W	ATG13		0.43635	0.30313	0.043599	0.26492	-0.37617	-0.054746		1.35318	1.23382	1.03068	1.20157	0.77048	0.962764
YDR236C	FMN1		0.43613	-0.51945	-0.27689	-0.0035856	1.6511	-1.1496		1.35297	0.697638	0.825368	0.997518	3.14073	0.45075
YPR003C			0.43535	-0.32436	-0.12912	-0.20624	0.16722	-0.74129		1.35224	0.798653	0.914389	0.866793	1.12289	0.598204
YJR135C	MCM22		0.4349	-0.059288	-0.43128	-0.3773	0.10715	-0.69376		1.35182	0.959738	0.741604	0.769877	1.0771	0.61824
YGL101W			0.43487	-1.0464	-0.78169	-0.49739	-0.41105	-2.0455		1.35179	0.484175	0.581685	0.708387	0.752076	0.242238
YDR160W	SSY1		0.43458	0.1589	0.032552	0.44101	0.021776	-0.60371		1.35152	1.11644	1.02282	1.35755	1.01521	0.65806
YLR097C	HRT3		0.43401	-0.27929	-0.38495	-0.18173	0.16315	-1.6219		1.35098	0.823996	0.765806	0.881645	1.11973	0.324907
YOR104W	PIN2		0.43392	0.086127	-0.014952	0.15759	0.29209	-0.52401		1.3509	1.06152	0.98969	1.11542	1.22441	0.695436
YOR180C	DCI1		0.43379	-0.29803	0.12214	0.20069	0.71641	-0.66329		1.35078	0.813362	1.08835	1.14925	1.64309	0.631437
YDL108W	KIN28		0.43367	0.098203	-0.046068	0.18569	-0.38783	-0.7712		1.35067	1.07044	0.968573	1.13736	0.764278	0.58593
YLR394W	CST9		0.43323	0.030253	-0.18609	0.013898	-0.021943	-0.76959		1.35025	1.02119	0.878985	1.00968	0.984905	0.586584
YLR456W			0.43321	-0.22151	-0.26592	0.16554	-0.77211	-0.93861		1.35023	0.857667	0.831668	1.12159	0.58556	0.521735
YKR037C	SPC34		0.43257	-0.48607	-0.50901	-0.18408	0.25457	-1.2236		1.34964	0.713967	0.702704	0.88021	1.19298	0.428213
YKR091W	SRL3		0.43253	-0.19755	0.90431	0.69764	0.5964	-0.17861		1.3496	0.87203	1.87165	1.62185	1.51194	0.883554
YPR079W	MRL1		0.4321	0.10749	-0.17657	0.67271	0.17539	-0.39913		1.3492	1.07735	0.884804	1.59406	1.12927	0.758315
YDR128W	MTC5		0.43127	0.24913	-0.27538	0.275	-0.099915	-0.46967		1.34842	1.18849	0.826233	1.20999	0.933088	0.72213
YGR161W-C			0.43091	0.14357	0.084346	-0.18739	-0.20862	-0.54052		1.34808	1.10464	1.06021	0.878193	0.865365	0.687523
YKR105C	VBA5		0.43084	-0.055446	-0.24074	0.047711	-0.064996	-0.70699		1.34802	0.962297	0.846311	1.03362	0.955948	0.612597
YLR201C	COQ9		0.43074	-0.40522	-0.53603	0.28932	0.23428	-1.5026		1.34792	0.755121	0.689666	1.22206	1.17632	0.352917
YDL030W	PRP9		0.43058	0.012017	-0.16615	0.001849	-0.20062	-1.0927		1.34778	1.00836	0.891218	1.00128	0.870177	0.468883
YOR011W	AUS1		0.42968	-0.067724	-0.30301	-0.016605	-0.47075	-1.0281		1.34693	0.954142	0.81056	0.988556	0.721589	0.490356
YKL053C-A	MDM35		0.4296	0.50458	0.44611	-0.067328	0.38451	-0.34112		1.34686	1.41871	1.36236	0.954404	1.30542	0.789428
YDL012C			0.42954	-0.41983	-0.47199	-0.50432	0.62366	-1.2152		1.3468	0.747513	0.720969	0.704993	1.54078	0.430713
YGR149W			0.4291	0.20902	0.42811	0.91513	0.27757	-0.37943		1.34639	1.1559	1.34547	1.88574	1.21215	0.768741
YMR066W	SOV1		0.42832	0.25652	-0.30245	0.11326	-0.17313	-0.39158		1.34567	1.19459	0.810874	1.08167	0.886916	0.762294
YCR083W	TRX3		0.42757	-0.30735	-0.32781	0.31766	0.012509	-1.5863		1.34497	0.808125	0.796745	1.24631	1.00871	0.333024
YMR064W	AEP1		0.42706	0.12087	-0.21248	0.074724	-0.18401	-0.83255		1.34449	1.08739	0.863052	1.05316	0.880253	0.561536
YNR065C			0.4267	0.25162	1.1831	1.3608	-0.2915	0.77249		1.34416	1.19054	2.27064	2.56828	0.817052	1.70822
YMR240C	CUS1		0.42667	-0.3828	-0.35748	-0.058005	0.41085	-0.65801		1.34413	0.766948	0.780527	0.960592	1.32947	0.633752
YFL027C	GYP8		0.42662	-0.18075	-0.24247	-0.11592	0.54039	-0.98485		1.34408	0.882244	0.845297	0.922794	1.45437	0.505278
YCR086W	CSM1		0.42661	0.090797	-0.41144	0.69743	-0.25716	-1.3038		1.34407	1.06496	0.751873	1.62161	0.836733	0.405058
YKR080W	MTD1		0.42657	-0.12295	0.073562	0.63533	-0.78608	-1.0739		1.34403	0.918308	1.05231	1.55329	0.579918	0.475033
YJL191W	RPS14B		0.42633	0.20386	0.83843	0.78919	0.88587	-1.2245		1.34381	1.15178	1.7881	1.7281	1.84788	0.427946
YPR037C	ERV2		0.42498	-0.22637	-0.24925	-0.19792	0.55621	-1.0474		1.34255	0.854783	0.841334	0.871807	1.4704	0.483839
YEL039C	CYC7		0.42497	-0.41471	-0.46702	-1.6087	-0.16178	0.94749		1.34254	0.75017	0.723457	0.327894	0.893921	1.92851
YPL242C	IQG1		0.42386	-0.077831	-0.44648	-0.0036759	0.2682	-0.12209		1.34151	0.947481	0.733831	0.997455	1.2043	0.918856
YAR019C	CDC15		0.42381	-0.45316	-0.16215	0.070508	1.4696	-0.78732		1.34147	0.730441	0.893692	1.05009	2.76945	0.579419
YOL137W	BSC6		0.42297	-0.1498	0.083261	0.53194	0.42002	-1.143		1.34068	0.901375	1.05941	1.44587	1.33795	0.452817
YFR008W	FAR7		0.42274	0.1526	-0.34679	0.38621	-0.30399	-1.4007		1.34047	1.11157	0.786332	1.30696	0.810009	0.378745
YMR299C	DYN3		0.42254	-0.16585	-0.4689	0.18603	0.19518	-0.60483		1.34029	0.891403	0.722515	1.13763	1.14487	0.657549
YBR258C	SHG1		0.42212	-0.3516	0.056793	-0.26351	0.35023	-0.71438		1.3399	0.783714	1.04015	0.833059	1.27476	0.609467
YBL059C-A	CMC2		0.42096	-0.67031	-0.70091	-0.59983	0.29699	-2.2847		1.33882	0.628372	0.615184	0.659832	1.22858	0.205228
YLR126C			0.41936	-0.15767	-0.057717	0.1445	0.51428	-1.1639		1.33733	0.896472	0.960783	1.10535	1.42828	0.446304
YGR222W	PET54		0.41935	0.32043	-0.059372	0.82874	0.16352	-0.79331		1.33732	1.2487	0.959682	1.77613	1.12002	0.577019
YGL227W	VID30		0.41927	0.4629	-0.14618	0.66245	-0.52276	-1.1897		1.33725	1.37831	0.90364	1.58277	0.696039	0.438394
YDL248W	COS7		0.41905	-0.01628	0.50254	0.54632	-1.4772	-0.4746		1.33705	0.988779	1.41671	1.46036	0.359185	0.719666
YLR238W	FAR10		0.41894	-0.27472	-0.49174	0.044287	-0.3204	-1.1767		1.33694	0.826611	0.711167	1.03117	0.800848	0.442362
YDR270W	CCC2		0.4187	0.59728	-0.090348	0.080829	0.35345	-1.1061		1.33672	1.51286	0.939296	1.05763	1.27761	0.464548
YMR011W	HXT2		0.41834	-0.37837	-0.70568	-1.0371	1.7827	-1.0979		1.33639	0.769306	0.613153	0.487306	3.44069	0.467196
YER098W	UBP9		0.4179	0.50058	-0.26531	0.42305	0.13148	-0.26269		1.33598	1.41478	0.83202	1.34076	1.09542	0.833532
YMR211W	DML1		0.41785	-0.1368	-0.32526	0.53677	-0.18469	-0.0847		1.33594	0.909534	0.798155	1.45072	0.879838	0.942981
YDR186C			0.41748	-0.014193	-0.22154	-0.271	0.0022223	-0.19581		1.33559	0.99021	0.857649	0.828745	1.00154	0.873083
YHL028W	WSC4		0.41746	-0.17702	-0.85177	-0.74617	-0.80339	-0.94808		1.33557	0.884528	0.554105	0.596184	0.573001	0.518322
YLR307W	CDA1		0.41639	0.14703	-0.45227	0.31146	0.98463	-0.61764		1.33458	1.10729	0.730892	1.24096	1.97881	0.651736
YMR201C	RAD14		0.41497	-0.0068298	0.048942	-0.085027	0.13994	-0.88273		1.33327	0.995277	1.03451	0.942767	1.10186	0.54234
YGR112W	SHY1		0.4148	0.52468	0.045539	0.37147	-0.80677	-0.57368		1.33311	1.43861	1.03207	1.29367	0.57166	0.671901
YDR200C	VPS64		0.4145	-0.20172	-0.27598	-0.0091459	-0.2107	-0.7498		1.33284	0.869513	0.825889	0.993681	0.864118	0.594686
YDR163W	CWC15		0.41347	0.21711	-0.073785	0.33454	-0.3781	-0.66039		1.33189	1.1624	0.950142	1.26098	0.76945	0.632707
YDR318W	MCM21		0.41214	-0.2833	0.10148	0.012361	-0.03553	-1.0827		1.33066	0.821709	1.07287	1.0086	0.975673	0.472144
YPL194W	DDC1		0.41207	0.3515	-0.18485	0.55814	-0.19879	-0.43453		1.33059	1.27589	0.879741	1.47237	0.871281	0.739935
YDR219C	MFB1		0.41116	-0.15378	-0.40313	-0.098192	1.0223	-0.63802		1.32975	0.898892	0.756216	0.934203	2.03115	0.642594
YDR079C-A	TFB5		0.41107	-0.67524	-0.7577	-0.74968	0.55682	-0.5218		1.32967	0.626228	0.591438	0.594735	1.47102	0.696502
YOR319W	HSH49		0.41071	-0.34707	-0.19327	-0.074268	-0.035207	-1.4266		1.32934	0.786179	0.874621	0.949824	0.975892	0.372007
YJL128C	PBS2		0.41052	-0.17434	-0.097573	-0.2995	0.3755	-0.62461		1.32916	0.886173	0.934604	0.812534	1.29729	0.648595
YGL044C	RNA15		0.40982	-0.20205	-0.34011	0.14326	0.34041	-0.12138		1.32852	0.869314	0.789981	1.1044	1.26612	0.919308
YCR054C	CTR86		0.40977	-0.39354	-0.32033	0.21062	0.26239	-1.0913		1.32847	0.761259	0.800887	1.15719	1.19946	0.469338
YGR013W	SNU71		0.4092	-0.017161	0.27563	0.2575	-0.3848	-0.93386		1.32795	0.988175	1.21052	1.19541	0.765885	0.523456
YPL008W	CHL1		0.40918	0.15438	-0.12384	0.52845	-0.02547	-0.44925		1.32793	1.11294	0.917742	1.44238	0.9825	0.732424
YJL118W			0.40872	-0.73195	0.17563	0.023948	0.95222	-0.65757		1.32751	0.60209	1.12946	1.01674	1.93485	0.633945
YGL224C	SDT1		0.40857	-0.68683	-0.059791	0.68819	-0.71243	0.10688		1.32737	0.621217	0.959403	1.61126	0.610291	1.0769
YDR162C	NBP2		0.40814	-0.089723	-0.1675	-0.2049	-0.16729	-0.66193		1.32697	0.939703	0.890384	0.867599	0.890514	0.632032
YLR247C	IRC20		0.40708	0.024943	-0.40547	0.15374	0.11971	-0.25984		1.326	1.01744	0.75499	1.11245	1.08652	0.835181
YPR134W	MSS18		0.40666	0.1618	-0.033795	0.17412	0.11361	-1.4521		1.32561	1.11868	0.976847	1.12828	1.08193	0.365489
YJR089W	BIR1		0.40548	0.04686	-0.35439	0.23237	-0.1556	-0.77849		1.32453	1.03301	0.7822	1.17476	0.897759	0.582977
YOR269W	PAC1		0.40533	-0.28526	-0.0039991	-0.3287	0.36878	-0.54127		1.32439	0.820594	0.997232	0.796254	1.29126	0.687166
YLR368W	MDM30		0.4053	-0.091792	-0.34951	0.062782	-0.10585	-0.5608		1.32436	0.938356	0.784851	1.04448	0.929257	0.677926
YBR238C			0.40456	-0.78371	-0.034854	-0.851	0.62428	-0.69161		1.32369	0.580871	0.976131	0.5544	1.54144	0.619162
YFR045W			0.40343	-0.012887	-0.13083	-0.1097	-0.2651	-1.3293		1.32265	0.991107	0.913306	0.926781	0.832141	0.397961
YDR258C	HSP78		0.40308	0.72998	0.11512	0.14417	-0.093818	-0.67317		1.32233	1.65862	1.08307	1.10509	0.93704	0.627127
YOL036W			0.40228	0.25376	0.052387	0.28291	-0.016428	-0.61346		1.32159	1.19231	1.03698	1.21665	0.988678	0.653627
YGL216W	KIP3		0.4015	0.080866	0.13012	0.34552	0.065144	-0.45728		1.32088	1.05765	1.09438	1.27061	1.04619	0.728358
YBR195C	MSI1		0.40128	-0.28513	-0.81242	-0.021456	0.39778	-1.2314		1.32068	0.820668	0.569426	0.985238	1.31748	0.425904
YDL017W	CDC7		0.40102	0.11796	-0.46891	0.32463	0.22999	-0.88569		1.32044	1.0852	0.72251	1.25234	1.17283	0.541229
YPL092W	SSU1		0.40096	-0.020967	0.49565	0.83704	-0.95685	-0.75525		1.32039	0.985572	1.40996	1.78638	0.515181	0.592444
YGL229C	SAP4		0.40071	-0.042226	-0.34569	-0.24483	-0.59972	-1.1584		1.32016	0.971155	0.786932	0.843915	0.659882	0.448009
YLR275W	SMD2		0.40051	-0.25449	-0.52171	-0.13663	0.023007	-0.41081		1.31997	0.838283	0.696546	0.909642	1.01608	0.752201
YJL077C	ICS3		0.40028	-0.3211	-0.58449	0.86504	0.37254	-1.1687		1.31976	0.800459	0.666885	1.82139	1.29463	0.444822
YJR082C	EAF6		0.40026	-0.31151	-0.49304	-0.25892	0.14817	-0.63466		1.31975	0.805798	0.710526	0.835713	1.10816	0.644093
YDL125C	HNT1		0.40003	-0.84385	-0.57244	-0.13979	1.2238	-1.7482		1.31954	0.557155	0.672478	0.907651	2.33561	0.297673
YGL053W	PRM8		0.39959	0.047336	-0.28453	-0.18267	0.054786	-0.66012		1.31913	1.03336	0.821009	0.881071	1.03871	0.632826
YIR030C	DCG1		0.39941	-0.28184	-0.6696	-0.42443	-0.17306	-0.83387		1.31897	0.822541	0.628681	0.745133	0.886959	0.561022
YPL068C			0.39932	-0.36748	-0.41144	-0.30568	0.94698	-0.40143		1.31889	0.775135	0.751873	0.809061	1.92783	0.757107
YIL002C	INP51		0.39921	0.10343	-0.069272	0.10148	0.12184	-0.42308		1.31879	1.07432	0.953119	1.07287	1.08812	0.745831
YMR140W	SIP5		0.39879	0.39356	0.0514	0.59728	-0.18276	-0.43777		1.3184	1.31363	1.03627	1.51286	0.881016	0.738275
YLR078C	BOS1		0.39854	-0.56709	-0.73974	0.1167	0.2641	-1.2497		1.31817	0.674977	0.598847	1.08425	1.20089	0.420536
YKR052C	MRS4		0.39852	-0.25521	-0.13229	-0.03843	0.50534	-0.78543		1.31815	0.837865	0.912382	0.973714	1.41946	0.580179
YDR089W			0.39841	-0.31904	-0.11134	-0.28194	-0.53118	-1.54		1.31805	0.801603	0.925728	0.822484	0.691989	0.343885
YNR037C	RSM19		0.39811	-0.57741	-0.22494	-0.37941	0.34322	-1.5242		1.31778	0.670166	0.855631	0.768752	1.26858	0.347672
YFR003C	YPI1		0.39762	-0.26055	-0.47111	-0.13525	-0.085422	-0.50235		1.31733	0.83477	0.721409	0.910512	0.942509	0.705956
YGL063W	PUS2		0.39762	-0.23161	-0.40622	0.11206	1.1446	-0.73556		1.31733	0.851684	0.754598	1.08077	2.21085	0.600585
YLR098C	CHA4		0.39734	-0.28449	-0.20601	-0.28425	0.46405	-0.96275		1.31708	0.821032	0.866932	0.821168	1.37941	0.513078
YEL076C-A			0.3972	0.38639	0.37855	-0.53312	0.18333	-0.67801		1.31695	1.30712	1.30003	0.691059	1.1355	0.625027
YER011W	TIR1		0.39562	0.80552	0.60697	-1.3046	1.6021	-1.7919		1.31551	1.74778	1.52306	0.404833	3.03585	0.288791
YBR024W	SCO2		0.39546	0.43681	-0.36769	0.082182	-0.22048	-0.45872		1.31536	1.35361	0.775022	1.05862	0.85828	0.727632
YDR515W	SLF1		0.39537	0.23802	-0.18521	0.1425	-0.25029	-1.2245		1.31528	1.17937	0.879521	1.10382	0.840727	0.427946
YOL042W	NGL1		0.39506	-0.20999	-0.35619	0.43877	-0.22277	-1.6317		1.315	0.864543	0.781225	1.35545	0.856919	0.322708
YLR260W	LCB5		0.39497	0.34682	-0.097199	0.44423	-0.28774	-1.0958		1.31492	1.27175	0.934846	1.36059	0.819184	0.467877
YML034W	SRC1		0.39436	0.23208	-0.47853	0.087241	-0.04972	-1.1042		1.31436	1.17453	0.717709	1.06234	0.966124	0.46516
YLR326W			0.39359	0.3022	0.18841	0.44949	-0.048677	-0.4179		1.31366	1.23302	1.13951	1.36556	0.966823	0.748513
YNL038W	GPI15		0.39266	-0.31514	-0.50097	-0.10621	0.13261	-1.1328		1.31281	0.803773	0.706632	0.929025	1.09628	0.45603
YKR029C	SET3		0.39238	-0.005683	-0.28149	0.1393	0.053769	-0.57328		1.31256	0.996069	0.822741	1.10137	1.03797	0.672087
YMR164C	MSS11		0.39203	0.19574	-0.23702	0.10032	0.14946	-0.81138		1.31224	1.14531	0.848496	1.07201	1.10915	0.569837
YDL230W	PTP1		0.39156	0.12676	-0.11437	0.15839	0.024242	-0.99887		1.31181	1.09184	0.923786	1.11604	1.01695	0.500392
YNL029C	KTR5		0.39114	-0.49525	-0.44723	0.74066	0.71093	-0.63895		1.31143	0.709439	0.73345	1.67094	1.63686	0.64218
YPL065W	VPS28		0.391	0.078577	-0.40603	0.28661	-0.31682	-1.5764		1.3113	1.05598	0.754697	1.21977	0.802838	0.335318
YKL105C	SEG2		0.39089	0.15925	-0.30679	0.13307	-0.34068	-0.45185		1.3112	1.11671	0.808439	1.09662	0.789669	0.731105
YDL013W	SLX5		0.39045	-0.055696	-0.14379	0.14199	-0.065659	-0.79054		1.3108	0.96213	0.905138	1.10343	0.955509	0.578128
YHR069C	RRP4		0.39005	-0.59176	-0.26913	-0.42946	0.44768	-0.5746		1.31044	0.663533	0.82982	0.74254	1.36385	0.671472
YDL106C	PHO2		0.38999	-0.0617	-0.19529	0.084704	0.095854	-0.92526		1.31038	0.958134	0.873397	1.06047	1.0687	0.526586
YER106W	MAM1		0.38993	0.31046	-0.070239	0.68409	0.072393	-0.14985		1.31033	1.2401	0.95248	1.60669	1.05146	0.901344
YGR032W	GSC2		0.38985	0.81194	0.70288	0.92179	1.2975	-0.30974		1.31026	1.75557	1.62775	1.89446	2.45803	0.806787
YDR466W	PKH3		0.38956	0.25321	-0.24526	0.029557	-0.27144	-0.62527		1.30999	1.19186	0.843664	1.0207	0.828492	0.648298
YDL159W	STE7		0.38829	-0.10641	-0.13884	0.081071	-0.030697	-1.1115		1.30884	0.928897	0.908249	1.0578	0.978947	0.462813
YHR195W	NVJ1		0.38759	0.08263	-0.2023	0.15051	-0.37449	-0.69723		1.30821	1.05895	0.869164	1.10996	0.771378	0.616755
YIL031W	ULP2		0.38749	-0.037771	-0.22292	0.32431	0.0081465	-0.65366		1.30812	0.974159	0.856829	1.25207	1.00566	0.635666
YJR136C	TTI2		0.38746	-0.48692	-0.46536	-0.33419	0.46548	-1.1139		1.30809	0.713547	0.72429	0.793229	1.38078	0.462043
YLL005C	SPO75		0.38736	-0.15262	0.031212	0.35869	-0.11638	-1.0235		1.308	0.899615	1.02187	1.28226	0.922499	0.491921
YMR028W	TAP42		0.38688	0.033468	-0.2623	0.08258	-0.27766	-0.54147		1.30756	1.02347	0.833758	1.05891	0.824928	0.68707
YER076C			0.38675	-0.71905	-0.56215	-0.53771	0.72799	-1.7731		1.30744	0.607497	0.677292	0.688863	1.65633	0.292579
YOR358W	HAP5		0.38627	0.35544	0.18048	0.033294	-0.21016	-1.1472		1.30701	1.27938	1.13326	1.02335	0.864441	0.451501
YLR128W	DCN1		0.38616	-0.069838	-0.64587	-0.1295	-0.44063	-0.93711		1.30691	0.952745	0.639107	0.914148	0.736813	0.522278
YNL187W	SWT21		0.38602	0.12766	0.033293	-0.30829	-0.12193	-0.85035		1.30678	1.09252	1.02335	0.807598	0.918957	0.55465
YOR148C	SPP2		0.3854	-0.25976	-0.26461	-0.066459	0.54196	-0.96377		1.30622	0.835227	0.832424	0.954979	1.45595	0.512715
YDR016C	DAD1		0.38514	-0.80901	-0.88574	0.086201	0.53842	-2.5257		1.30599	0.570773	0.54121	1.06157	1.45238	0.173655
YER143W	DDI1		0.38408	0.52584	-0.099487	0.57715	-0.15886	-0.67249		1.30503	1.43977	0.933365	1.4919	0.895733	0.627423
YMR155W			0.38395	-0.30935	-0.20606	0.27064	-0.026731	-0.95473		1.30491	0.807005	0.866902	1.20634	0.981642	0.515938
YMR102C			0.38393	0.44576	-0.34348	-0.42368	1.1153	-1.049		1.30489	1.36203	0.788138	0.745521	2.1664	0.483303
YPL096W	PNG1		0.38377	0.1932	-0.34691	0.13565	-0.24959	-1.0109		1.30475	1.1433	0.786266	1.09859	0.841135	0.496237
YGR196C	FYV8		0.3835	0.11269	-0.26232	0.38638	-0.025436	-0.53695		1.3045	1.08124	0.833746	1.30711	0.982524	0.689226
YPL209C	IPL1		0.38322	-0.31472	-0.41649	-0.26549	0.11128	-0.81003		1.30425	0.804007	0.749245	0.831916	1.08019	0.57037
YDL044C	MTF2		0.38312	-0.18377	-0.46407	0.30039	0.21097	-0.57305		1.30416	0.880399	0.724938	1.23148	1.15747	0.672194
YNL077W	APJ1		0.383	0.87302	-0.21766	0.58675	-0.018681	-0.63604		1.30405	1.83149	0.859959	1.50186	0.987135	0.643477
YPR168W	NUT2		0.38298	0.21555	0.57287	0.12384	-0.55459	-0.33918		1.30403	1.16115	1.48748	1.08963	0.680851	0.79049
YBL033C	RIB1		0.38247	-0.2784	-0.29892	-0.49449	-0.36089	-0.55285		1.30357	0.824505	0.812861	0.709813	0.778684	0.681672
YLR438W	CAR2		0.38241	-0.20439	0.066399	0.83871	1.0424	-0.84776		1.30352	0.867906	1.0471	1.78845	2.05965	0.555647
YDR369C	XRS2		0.38232	-0.067061	-0.35699	-0.086559	0.035561	-0.80653		1.30344	0.954581	0.780792	0.941766	1.02496	0.571755
YGR023W	MTL1		0.38214	-0.21663	0.1403	-0.10841	0.12903	-0.28636		1.30327	0.860573	1.10213	0.92761	1.09356	0.819968
YNL125C	ESBP6		0.38203	-0.27234	-0.11575	0.37751	0.48538	-0.18953		1.30317	0.827976	0.922902	1.2991	1.39995	0.876891
YNL136W	EAF7		0.38129	0.0037402	-0.29366	0.05637	-0.43375	-0.64706		1.30251	1.0026	0.81583	1.03985	0.740335	0.63858
YBR006W	UGA2		0.38052	0.17199	0.071798	0.23717	0.045586	-1.0596		1.30181	1.12661	1.05103	1.17868	1.0321	0.479765
YPL138C	SPP1		0.38027	-0.5178	-0.35231	-0.23711	0.1918	-0.069079		1.30159	0.698436	0.783329	0.848443	1.14219	0.953246
YGL047W	ALG13		0.38003	-0.29747	-0.39818	-0.070198	-0.54605	-2.384		1.30137	0.813678	0.758815	0.952507	0.684893	0.191577
YML132W	COS3		0.37998	0.017369	0.42113	0.81359	-1.2505	-0.66297		1.30132	1.01211	1.33898	1.75758	0.420303	0.631577
YLL007C	LMO1		0.37983	-0.10717	-0.18467	-0.22193	0.17373	-1.1179		1.30119	0.928407	0.87985	0.857418	1.12797	0.460764
YKL015W	PUT3		0.3796	-0.070121	-0.1498	-0.74094	-0.54813	-0.65442		1.30098	0.952558	0.901375	0.598349	0.683906	0.635331
YKL093W	MBR1		0.3796	-0.3309	-0.2605	-0.30103	0.50424	-0.26596		1.30098	0.79504	0.834799	0.811673	1.41838	0.831645
YOL019W-A			0.37931	NaN	NaN	NaN	-0.17978	NaN		1.30072	N/A	N/A	N/A	0.882838	N/A
YGR048W	UFD1		0.37898	0.3792	-0.21156	0.31117	0.087235	-0.76064		1.30042	1.30062	0.863603	1.24071	1.06233	0.590234
YOR138C	RUP1		0.37833	-0.20534	-0.29505	0.063059	0.42475	-0.77465		1.29984	0.867334	0.815044	1.04468	1.34234	0.58453
YLR424W	SPP382		0.37801	0.066194	-0.10732	0.50342	0.89005	-0.86463		1.29955	1.04695	0.928311	1.41757	1.85324	0.549187
YOR205C	GEP3		0.37768	-0.047187	-0.24723	-0.11695	0.17805	-0.3819		1.29925	0.967822	0.842513	0.922135	1.13135	0.767426
YBR157C	ICS2		0.37646	0.37376	-0.25803	-0.1566	0.43719	-1.6089		1.29815	1.29573	0.836229	0.897137	1.35396	0.327848
YER132C	PMD1		0.37509	-0.060643	0.83658	-0.17937	0.14066	-0.33084		1.29692	0.958837	1.78581	0.883089	1.10241	0.795073
YJL013C	MAD3		0.37474	-0.08543	-0.42215	-0.20235	0.057317	-0.79175		1.29661	0.942504	0.746312	0.869134	1.04053	0.577643
YLR226W	BUR2		0.37458	-0.012639	-0.17427	0.055279	-0.18856	-0.94795		1.29646	0.991278	0.886216	1.03906	0.877481	0.518369
YJR086W	STE18		0.37456	-0.71897	-0.73351	0.4463	-0.17822	-1.1456		1.29644	0.607531	0.601439	1.36254	0.883793	0.452002
YHR038W	RRF1		0.37394	0.43556	-0.46677	0.71738	-0.18445	-1.2032		1.29589	1.35244	0.723583	1.64419	0.879984	0.434311
YBR288C	APM3		0.3739	-0.66378	-0.47272	-0.056198	0.21379	-1.3952		1.29585	0.631222	0.720605	0.961795	1.15973	0.380192
YOR334W	MRS2		0.37348	-0.19779	-0.089929	-0.02091	0.15925	-0.97055		1.29547	0.871885	0.939569	0.985611	1.11671	0.510311
YJL084C	ALY2		0.37337	-0.05052	0.55241	-0.029182	0.16968	-0.83296		1.29538	0.965588	1.46653	0.979976	1.12481	0.561376
YEL062W	NPR2		0.37175	-0.19304	-0.14264	-0.0494	-0.10574	-0.78191		1.29392	0.874761	0.90586	0.966338	0.929328	0.581596
YOR042W	CUE5		0.3706	-0.25965	0.5011	0.15073	-0.37351	-0.62704		1.29289	0.835291	1.41529	1.11013	0.771902	0.647504
YKL051W	SFK1		0.37034	-0.098069	0.15845	0.89179	0.25496	0.32136		1.29266	0.934283	1.11609	1.85548	1.1933	1.24951
YBR197C			0.37005	-0.060103	0.12055	0.074307	-0.021796	-0.75495		1.2924	0.959196	1.08715	1.05286	0.985006	0.592567
YNL214W	PEX17		0.36845	0.014044	-0.36176	0.071919	-0.37201	-1.6573		1.29097	1.00978	0.778215	1.05111	0.772705	0.317032
YKL149C	DBR1		0.36812	-0.42203	-0.61534	-0.35406	0.42476	-0.99042		1.29067	0.746374	0.652776	0.782379	1.34235	0.503331
YBR120C	CBP6		0.36741	-0.25555	-0.63948	-0.10327	0.065749	-0.72286		1.29003	0.837668	0.641944	0.930921	1.04663	0.605895
YCR020C-A	MAK31		0.36669	-0.45767	-0.46533	0.38067	0.83435	-1.121		1.28939	0.728161	0.724305	1.30195	1.78305	0.459775
YER024W	YAT2		0.36658	0.60791	0.3906	0.55819	-0.64865	0.63271		1.28929	1.52405	1.31094	1.47242	0.637877	1.55047
YHL025W	SNF6		0.36607	-0.13454	-0.2967	-0.022929	-0.37756	-0.94972		1.28884	0.91096	0.814112	0.984232	0.769738	0.517733
YOL017W	ESC8		0.36574	0.20123	-0.031082	0.6495	0.077202	-0.49939		1.28854	1.14968	0.978686	1.56862	1.05497	0.707406
YOR022C			0.36477	0.067947	-0.28489	0.11828	-0.26207	-0.64869		1.28768	1.04822	0.820804	1.08544	0.833891	0.637859
YPL219W	PCL8		0.36473	0.0076756	-0.24142	-0.042984	0.11502	-1.0068		1.28764	1.00533	0.845912	0.970645	1.08299	0.497649
YDR443C	SSN2		0.36384	-0.22625	-0.28664	-0.15006	-0.002638	-0.73606		1.28685	0.854854	0.819809	0.901213	0.998173	0.600377
YPL152W	RRD2		0.36377	-0.11137	-0.30742	0.67895	0.20335	-1.1106		1.28678	0.925709	0.808086	1.60097	1.15137	0.463101
YLR045C	STU2		0.36362	-0.50634	-0.094177	-0.38031	-0.28726	-0.88229		1.28665	0.704006	0.936807	0.768272	0.819457	0.542506
YGL117W			0.36335	0.16622	0.89151	0.73928	-2.6027	1.1287		1.28641	1.12211	1.85512	1.66934	0.16463	2.18662
YDR357C	CNL1		0.36331	-1.0942	-0.56657	-0.095216	-0.32901	-0.93338		1.28637	0.468396	0.67522	0.936132	0.796083	0.52363
YGR097W	ASK10		0.36292	-0.28607	0.19301	-0.054173	0.079596	-0.53654		1.28603	0.820133	1.14315	0.963146	1.05672	0.689422
YGL138C			0.36289	-0.4033	0.37344	0.075456	-0.010378	-0.44709		1.286	0.756127	1.29544	1.05369	0.992832	0.733521
YDL133W	SRF1		0.36281	0.022817	-0.15544	0.36742	-0.053964	-1.3271		1.28593	1.01594	0.897858	1.29004	0.963286	0.398569
YJL031C	BET4		0.36255	-0.55178	-0.37209	-0.15957	0.22347	-1.4606		1.2857	0.682178	0.772662	0.895292	1.16754	0.363342
YER087W	AIM10		0.36186	0.28842	-0.19495	0.29768	-0.42467	-0.61385		1.28508	1.2213	0.873603	1.22917	0.745009	0.653451
YJL066C	MPM1		0.36161	0.31453	0.070877	-0.15346	-0.19447	-1.385		1.28486	1.24361	1.05035	0.899092	0.873894	0.382889
YHR173C			0.36158	-0.3541	-0.3933	0.22094	0.24346	-1.2988		1.28483	0.782358	0.761386	1.16549	1.18383	0.406464
YKR017C	HEL1		0.35999	-0.36356	-0.36859	-0.16804	0.13	-0.54914		1.28342	0.777244	0.774539	0.890051	1.09429	0.683427
YGL018C	JAC1		0.35975	-0.25051	-0.42789	-0.52986	-0.33048	-1.6036		1.2832	0.840599	0.743348	0.692622	0.795272	0.329055
YLL058W			0.35949	0.30955	-0.25515	0.64534	-0.013212	-0.47262		1.28297	1.23932	0.8379	1.56411	0.990884	0.720655
YOR130C	ORT1		0.35941	-0.53646	-0.20517	0.12267	-0.93801	-0.18689		1.2829	0.689461	0.867436	1.08875	0.521952	0.878497
YOL013C	HRD1		0.35916	-0.28203	-0.1515	-0.30709	0.062287	-1.5526		1.28268	0.822433	0.900314	0.80827	1.04412	0.340895
YDR375C	BCS1		0.35761	-0.045588	-0.4173	-0.29365	-0.0020281	-0.78886		1.2813	0.968895	0.748825	0.815835	0.998595	0.578801
YDL101C	DUN1		0.35725	-0.53611	-0.43272	0.44798	0.042244	-0.71348		1.28098	0.689628	0.740864	1.36413	1.02971	0.609847
YNL097C	PHO23		0.35657	-0.16954	0.12606	-0.049444	0.29549	-1.0952		1.28038	0.889126	1.09131	0.966309	1.2273	0.468071
YGL013C	PDR1		0.3559	0.20328	-0.21212	-0.31554	0.092342	-0.45634		1.27978	1.15131	0.863268	0.80355	1.0661	0.728833
YMR224C	MRE11		0.35547	-0.19645	-0.49408	-0.20996	0.33266	-0.97997		1.2794	0.872695	0.710014	0.864561	1.25933	0.50699
YDL215C	GDH2		0.3551	-0.35171	0.16764	0.17343	0.44775	-1.1284		1.27907	0.783655	1.12322	1.12774	1.36391	0.457423
YMR187C			0.35306	-0.76324	-0.58248	-0.39589	0.19316	-0.92731		1.27727	0.589172	0.667815	0.76002	1.14327	0.525838
YGL174W	BUD13		0.35294	0.057172	-0.1116	0.31669	-0.09005	-0.92472		1.27716	1.04042	0.925561	1.24547	0.93949	0.526783
YNL260C	LTO1		0.35278	-0.078333	0.036247	0.011812	-0.35558	-0.34285		1.27702	0.947151	1.02544	1.00822	0.781555	0.788482
YDL105W	NSE4		0.35268	-0.13955	0.076955	0.047734	0.038008	-0.97703		1.27693	0.907802	1.05479	1.03364	1.0267	0.508025
YDL129W			0.35196	0.22897	-0.43428	-0.44454	0.12173	-0.78419		1.27629	1.172	0.740063	0.734819	1.08804	0.580678
YHR080C			0.35179	-0.16794	-0.5926	0.10782	0.13347	-0.4234		1.27614	0.890113	0.663147	1.0776	1.09693	0.745665
YLR117C	CLF1		0.35177	-0.26784	-0.29593	-0.1698	0.18747	-0.4843		1.27613	0.830562	0.814547	0.888966	1.13876	0.714844
YNL249C	MPA43		0.3517	-0.59169	-0.49176	0.076981	0.053366	-0.77776		1.27606	0.663565	0.711157	1.05481	1.03768	0.583272
YPL088W			0.35168	-0.019049	0.9245	0.8253	1.3466	-1.0007		1.27605	0.986883	1.89803	1.7719	2.54312	0.499757
YPL141C	FRK1		0.35148	-0.34676	-0.71339	-0.30713	0.22047	-0.076233		1.27587	0.786348	0.609885	0.808248	1.16511	0.948531
YJL205C	NCE101		0.35135	0.093183	-0.17853	0.043456	0.54904	-0.99298		1.27575	1.06672	0.883603	1.03058	1.46311	0.502439
YBR290W	BSD2		0.35124	0.14399	-0.12123	0.45999	0.10814	-0.92994		1.27566	1.10496	0.919403	1.37553	1.07784	0.52488
YPR070W	MED1		0.35123	-0.15373	-0.43854	0.26951	-0.077937	-0.82339		1.27565	0.898923	0.737881	1.2054	0.947411	0.565112
YBR223C	TDP1		0.35085	0.047329	0.24588	0.11343	0.23092	-0.87031		1.27531	1.03335	1.18582	1.0818	1.17358	0.547029
YNL157W	IGO1		0.35054	0.024927	-0.29695	0.25557	0.16068	-1.0508		1.27504	1.01743	0.813971	1.19381	1.11781	0.4827
YHR075C	PPE1		0.35014	0.24308	-0.031887	0.29854	0.45294	-0.51109		1.27468	1.18352	0.97814	1.2299	1.36883	0.701692
YKL091C			0.34982	-0.23579	-0.19419	0.45418	0.070877	-1.9038		1.2744	0.84922	0.874064	1.37	1.05035	0.267239
YFR053C	HXK1		0.34937	0.68513	-0.00049296	-0.10698	0.17564	-0.53904		1.274	1.60785	0.999658	0.92853	1.12947	0.688229
YKL043W	PHD1		0.3491	-0.11664	-0.079793	-0.071725	-0.59046	-1.8803		1.27377	0.922333	0.946193	0.9515	0.664131	0.271627
YGR057C	LST7		0.34849	-0.23773	-0.22109	-0.06649	0.41961	-1.2979		1.27323	0.848079	0.857917	0.954959	1.33757	0.406718
YGR170W	PSD2		0.3481	0.15481	-0.2198	0.032771	-0.22538	-0.70052		1.27288	1.11327	0.858684	1.02298	0.85537	0.61535
YIL071C	PCI8		0.34783	-0.03657	-0.041781	0.11455	0.1145	-0.68055		1.27264	0.97497	0.971455	1.08264	1.0826	0.623927
YML016C	PPZ1		0.34768	-0.034118	0.33632	0.12802	0.59472	-0.5307		1.27251	0.976629	1.26253	1.09279	1.51018	0.692219
YEL061C	CIN8		0.34701	-0.3649	-0.53362	-0.57012	-0.00033182	-0.9645		1.27192	0.776523	0.690819	0.673561	0.99977	0.512456
YBR233W	PBP2		0.34585	-0.015648	-0.16483	-0.17943	0.01664	-0.44948		1.2709	0.989212	0.892034	0.883052	1.0116	0.732307
YML011C	RAD33		0.34584	-0.25779	-0.60571	0.05618	0.65296	-1.207		1.27089	0.836368	0.657148	1.03971	1.57239	0.433168
YBR201W	DER1		0.34553	-0.16348	-0.085408	0.57274	-0.13085	-1.1435		1.27062	0.892869	0.942518	1.48735	0.913293	0.45266
YKL095W	YJU2		0.34504	0.45686	-0.21404	0.26752	-0.13831	-0.55068		1.27019	1.37255	0.86212	1.20374	0.908583	0.682698
YDR059C	UBC5		0.34476	0.06175	0.11462	0.14895	0.30771	0.12523		1.26994	1.04373	1.08269	1.10876	1.23774	1.09068
YOR129C	AFI1		0.34346	-0.68368	-0.51915	-0.4281	0.019543	-0.87559		1.2688	0.622575	0.697783	0.74324	1.01364	0.545031
YGL192W	IME4		0.34318	-0.44865	-0.33927	-0.20786	0.79589	-0.35115		1.26855	0.732728	0.790441	0.865821	1.73615	0.783959
YMR036C	MIH1		0.34311	-0.43215	-0.49723	-0.40381	0.35394	-0.35855		1.26849	0.741156	0.708466	0.75586	1.27805	0.779948
YDR532C	KRE28		0.34287	-0.45747	-0.27977	-0.27411	-0.2006	-0.74366		1.26828	0.728262	0.823722	0.82696	0.870189	0.597222
YCR068W	ATG15		0.34264	0.072275	0.29651	0.84983	-0.084875	-0.77611		1.26807	1.05137	1.22817	1.80229	0.942866	0.583939
YOR213C	SAS5		0.34184	-0.53814	-0.37219	-0.37501	0.27	-0.17642		1.26737	0.688658	0.772609	0.7711	1.20581	0.884896
YMR115W	MGR3		0.34177	0.30908	-0.50053	0.046292	-0.31238	-0.52231		1.26731	1.23892	0.706847	1.03261	0.805312	0.696256
YGL136C	MRM2		0.34173	-0.059265	-0.2999	0.1634	0.37626	-0.84685		1.26728	0.959753	0.812309	1.11992	1.29797	0.555997
YDL076C	RXT3		0.34101	-0.17823	-0.30049	-0.35203	0.45705	-1.4117		1.26664	0.883787	0.811977	0.783481	1.37273	0.375869
YLR233C	EST1		0.34083	-0.00090391	-0.53465	0.011541	0.56019	-0.83832		1.26649	0.999374	0.690326	1.00803	1.47446	0.559294
YOR338W			0.3408	-0.36177	-0.45101	-0.89506	0.049341	-1.8406		1.26646	0.778209	0.731531	0.537725	1.03479	0.279206
YER175C	TMT1		0.34044	-0.22288	-0.14465	-0.30412	-1.5183	0.26203		1.26614	0.856853	0.904599	0.809936	0.349097	1.19916
YDR204W	COQ4		0.34028	0.0048432	-0.10863	0.42326	-0.5935	-1.013		1.266	1.00336	0.927468	1.34095	0.662733	0.495515
YPL071C			0.33983	-0.0031331	-0.19353	0.15933	0.35211	-0.44769		1.26561	0.997831	0.874463	1.11677	1.27643	0.733216
YMR113W	FOL3		0.33971	-0.20556	-0.36318	0.031128	-0.09064	-0.81238		1.2655	0.867202	0.777449	1.02181	0.939106	0.569442
YML114C	TAF8		0.33951	-0.17956	0.043594	-0.051118	0.21114	-0.60025		1.26533	0.882972	1.03068	0.965188	1.1576	0.65964
YCR102C			0.3393	-1.6914	-0.60583	0.0060273	-1.156	-0.51098		1.26514	0.309626	0.657093	1.00419	0.448755	0.701746
YJR161C	COS5		0.33882	-0.23965	0.21871	0.39657	-1.117	-0.367		1.26472	0.846951	1.16369	1.31637	0.461052	0.775393
YMR135C	GID8		0.33827	0.10731	-0.32349	0.0021657	0.18878	-0.87727		1.26424	1.07722	0.799134	1.0015	1.1398	0.544397
YDR480W	DIG2		0.33776	-0.16395	-0.37476	0.088199	-0.61094	-0.915		1.26379	0.892578	0.771234	1.06304	0.65477	0.530344
YCL034W	LSB5		0.33757	0.058563	-0.38868	0.82541	-0.2235	-1.3171		1.26363	1.04143	0.763828	1.77204	0.856485	0.401341
YMR073C	IRC21		0.3366	-0.85552	-0.50994	-0.17931	0.15941	-1.5707		1.26278	0.552666	0.702252	0.883125	1.11683	0.336645
YLR364W	GRX8		0.33633	-0.30525	-0.0073285	0.4357	0.84253	-1.7074		1.26254	0.809302	0.994933	1.35257	1.79319	0.306211
YOL045W	PSK2		0.33629	0.15061	-0.078549	0.10361	0.12055	-0.80561		1.26251	1.11004	0.94701	1.07446	1.08715	0.57212
YOR030W	DFG16		0.33605	0.15859	-0.11505	-0.019787	-0.053065	-0.50535		1.2623	1.1162	0.92335	0.986378	0.963886	0.704489
YBL103C	RTG3		0.33575	0.089423	-0.29807	-0.15773	-0.41117	-0.19967		1.26203	1.06394	0.81334	0.896434	0.752013	0.87075
YBR239C	ERT1		0.33564	-0.45373	0.096444	-0.42896	0.29869	-0.81016		1.26194	0.730153	1.06913	0.742797	1.23003	0.570319
YBL095W	MRX3		0.3352	-0.30451	-0.24862	0.33167	-0.0038515	-1.227		1.26155	0.809717	0.841701	1.25847	0.997334	0.427205
YNL311C	SKP2		0.33495	-0.33396	-0.35114	-0.31588	-0.6567	0.27447		1.26133	0.793356	0.783964	0.803361	0.634328	1.20955
YLR427W	MAG2		0.33452	-0.0080199	0.39249	0.15187	1.2633	-0.90472		1.26096	0.994456	1.31266	1.11101	2.40044	0.534136
YDR379C-A	SDH6		0.33431	0.06296	0.4846	1.1607	0.34755	-1.9365		1.26077	1.04461	1.3992	2.23566	1.2724	0.261249
YLL049W	LDB18		0.3341	-0.15529	-0.36299	0.6653	0.053324	-1.8107		1.26059	0.897952	0.777551	1.5859	1.03765	0.285053
YPL253C	VIK1		0.33337	-0.28145	-0.31849	-0.083786	-0.13134	-0.96408		1.25995	0.822764	0.801909	0.943578	0.912983	0.512605
YGR003W	CUL3		0.33276	0.14256	-0.23612	0.20677	0.029844	-0.83927		1.25942	1.10386	0.849026	1.1541	1.0209	0.558926
YPL247C			0.33194	-0.60657	0.027428	-0.16058	0.30156	-0.72451		1.2587	0.656756	1.01919	0.894665	1.23248	0.605203
YHR004C	NEM1		0.33186	-0.29814	-0.2218	-0.22057	0.11502	-1.0986		1.25864	0.8133	0.857495	0.858226	1.08299	0.466969
YOR162C	YRR1		0.33179	0.43224	0.083229	0.21227	-0.015501	-0.70999		1.25857	1.34933	1.05939	1.15851	0.989313	0.611324
YHR112C			0.33166	-0.38499	-0.037305	-0.24574	-0.057039	-2.0327		1.25846	0.765784	0.974474	0.843383	0.961235	0.244397
YLR234W	TOP3		0.33157	-0.0015666	-0.2217	-0.039754	0.52592	-0.77594		1.25838	0.998915	0.857554	0.972821	1.43985	0.584008
YGR150C	CCM1		0.32982	0.18113	-0.33618	0.13605	0.075601	-0.39297		1.25686	1.13377	0.792136	1.09889	1.0538	0.76156
YDR179W-A			0.3295	-0.46012	-0.42209	0.087358	-0.26618	-0.90171		1.25658	0.726926	0.746343	1.06242	0.831518	0.535252
YGR102C	GTF1		0.32878	-0.43997	-0.35787	-0.12048	0.59109	-0.27325		1.25595	0.73715	0.780316	0.919882	1.50638	0.827453
YER059W	PCL6		0.32763	0.29232	-0.2577	0.0014827	-0.12788	-1.0778		1.25495	1.22461	0.83642	1.00103	0.915175	0.473751
YDL136W	RPL35B		0.32732	-0.15846	-0.53941	-0.45341	0.37526	-1.394		1.25468	0.895981	0.688052	0.730315	1.29707	0.380508
YDR374W-A	WIP1		0.32696	0.23146	0.20396	0.41474	-0.036165	-1.6307		1.25437	1.17402	1.15186	1.33306	0.975244	0.322931
YLR072W			0.32675	0.34874	-0.10619	0.42639	-0.012361	-1.0751		1.25418	1.27345	0.929038	1.34387	0.991469	0.474638
YDR516C	EMI2		0.32601	-0.063525	-0.74364	-0.73675	-0.35491	-1.2371		1.25354	0.956923	0.597231	0.60009	0.781918	0.424225
YFR029W	PTR3		0.32551	0.24114	-0.52113	1.8143	-0.3322	-0.24775		1.25311	1.18193	0.696826	3.51689	0.794324	0.842209
YGR002C	SWC4		0.32544	0.033181	-0.25888	0.18144	0.027522	-0.77167		1.25305	1.02327	0.835736	1.13402	1.01926	0.585739
YJL059W	YHC3		0.32536	-0.16789	-0.082546	1.0087	0.36046	-1.2148		1.25298	0.890144	0.94439	2.0121	1.28384	0.430833
YIL102C-A			0.32506	0.096059	-0.10671	-0.27022	0.52506	-0.33194		1.25272	1.06885	0.928704	0.829193	1.43899	0.794467
YKL189W	HYM1		0.32447	-0.13179	-0.26365	0.40496	0.085831	-0.85961		1.2522	0.912698	0.832978	1.32405	1.0613	0.551102
YDR123C	INO2		0.32311	-0.20691	-0.58157	-0.60262	0.91924	-0.77242		1.25102	0.866391	0.668236	0.658557	1.89112	0.585435
YGR250C			0.3224	-0.18209	-0.23903	0.38958	-0.34677	-0.21546		1.25041	0.881425	0.847315	1.31001	0.786343	0.861272
YKL017C	HCS1		0.32202	-0.2388	-0.56809	-0.26364	-0.35941	-0.83786		1.25008	0.84745	0.674509	0.832984	0.779483	0.559473
YDR493W	MZM1		0.32135	-0.27388	-0.25818	-0.42878	-0.81845	-1.2339		1.2495	0.827092	0.836142	0.74289	0.567051	0.425167
YOR158W	PET123		0.32107	0.64579	0.042569	0.02737	-0.38869	-0.62301		1.24926	1.5646	1.02995	1.01915	0.763823	0.649315
YLR316C	TAD3		0.3207	-0.32021	-0.11454	-0.11249	0.15248	-1.0449		1.24894	0.800953	0.923677	0.92499	1.11148	0.484679
YPL229W			0.32005	-0.18879	-0.079746	-0.23349	0.071015	-0.4511		1.24837	0.877341	0.946224	0.850575	1.05046	0.731485
YAL055W	PEX22		0.3199	0.081646	-0.12719	0.063499	0.52833	-1.3802		1.24824	1.05822	0.915613	1.045	1.44226	0.384166
YHR078W			0.31931	-0.45922	-0.17956	0.39549	-0.20087	-0.98854		1.24773	0.727379	0.882972	1.31539	0.870026	0.503988
YGR295C	COS6		0.31899	-0.22219	0.34896	0.47823	0.34628	-0.89695		1.24746	0.857263	1.27364	1.39303	1.27128	0.537021
YDR476C			0.31805	-0.40967	-0.43239	-0.25792	0.52596	-1.0978		1.24664	0.752796	0.741033	0.836293	1.43989	0.467228
YPL089C	RLM1		0.31793	-0.17714	0.2254	-0.19874	0.2916	-0.54625		1.24654	0.884455	1.1691	0.871311	1.224	0.684798
YNL183C	NPR1		0.31739	-0.37009	-0.27455	-0.3546	0.073254	-0.33126		1.24607	0.773734	0.826708	0.782086	1.05209	0.794842
YOR201C	MRM1		0.3172	-0.32748	0.054684	-0.33087	0.46178	-0.14442		1.24591	0.796927	1.03863	0.795057	1.37724	0.904743
YGR015C			0.31645	-0.95517	-0.47029	-0.62597	0.14077	-1.3266		1.24526	0.515781	0.721819	0.647984	1.10249	0.398707
YOR306C	MCH5		0.31607	-0.25815	0.42621	-0.02925	0.83584	-0.69873		1.24493	0.836159	1.3437	0.97993	1.7849	0.616114
YDL028C	MPS1		0.31586	-0.21023	-0.6234	-0.13996	-0.033562	-0.73878		1.24475	0.864399	0.649139	0.907544	0.977005	0.599246
YGR092W	DBF2		0.31559	0.24682	-0.11749	0.41603	0.19396	-0.19403		1.24452	1.18659	0.92179	1.33425	1.1439	0.87416
YIL095W	PRK1		0.31557	0.11888	-0.16443	0.29664	-0.32172	-0.62506		1.2445	1.08589	0.892281	1.22828	0.800115	0.648393
YBL008W	HIR1		0.31555	0.10919	-0.18001	0.45927	0.13035	-0.55497		1.24449	1.07862	0.882697	1.37485	1.09456	0.680671
YOL155C	HPF1		0.31549	0.68064	0.91286	0.6047	0.4331	0.38464		1.24443	1.60285	1.88277	1.52066	1.35013	1.30553
YLR223C	IFH1		0.31543	-0.19278	-0.11576	-0.50102	0.2888	-0.63476		1.24438	0.874918	0.922896	0.706607	1.22162	0.644048
YML007W	YAP1		0.31515	0.21163	-0.22791	0.067391	-0.052896	-0.91863		1.24414	1.158	0.853871	1.04782	0.963999	0.529011
YOR255W	OSW1		0.31513	0.3211	-0.1653	0.14532	0.22395	0.085979		1.24412	1.24928	0.891743	1.10598	1.16793	1.06141
YKL140W	TGL1		0.31445	-0.15262	-0.20079	0.044535	-0.16735	-1.2183		1.24354	0.899615	0.870074	1.03135	0.890477	0.429789
YDR104C	SPO71		0.31435	0.22607	-0.47572	-0.06893	0.11676	-0.55656		1.24345	1.16964	0.719108	0.953345	1.0843	0.679921
YLR315W	NKP2		0.31348	-0.35515	0.27987	-0.17948	0.127	-0.43057		1.2427	0.781788	1.21409	0.883021	1.09202	0.741969
YDR130C	FIN1		0.31332	-0.011272	-0.3666	-0.22373	-0.082543	-0.74594		1.24256	0.992217	0.775608	0.856349	0.944392	0.596279
YKL048C	ELM1		0.31321	-0.13156	-0.39647	-0.13927	0.2996	-0.73347		1.24247	0.912844	0.759715	0.907978	1.2308	0.601456
YDR031W	MIX14		0.31127	0.15453	-0.34311	0.50329	-0.16651	-1.4468		1.2408	1.11306	0.78834	1.41744	0.890995	0.366834
YOR023C	AHC1		0.31054	-0.12767	-0.22104	-0.67786	0.31699	-1.0772		1.24017	0.915309	0.857947	0.625092	1.24573	0.473948
YBR114W	RAD16		0.31051	0.19452	-0.14807	-0.22193	0.41189	-1.0155		1.24015	1.14434	0.902457	0.857418	1.33043	0.494657
YIL061C	SNP1		0.30989	-0.12139	0.15519	-0.18973	-0.039399	-0.36744		1.23961	0.919302	1.11357	0.87677	0.97306	0.775157
YMR250W	GAD1		0.30969	0.39153	0.79927	0.89918	0.52171	-0.1367		1.23944	1.31178	1.74022	1.86501	1.43566	0.909597
YOR266W	PNT1		0.30957	0.38334	-0.4244	0.39698	-0.24914	-1.068		1.23934	1.30436	0.745149	1.31675	0.841398	0.47698
YLL009C	COX17		0.30918	0.33863	0.24133	0.036442	0.30757	-1.1346		1.239	1.26456	1.18208	1.02558	1.23762	0.455461
YGL145W	TIP20		0.30853	0.17132	-0.24787	0.39683	-0.058619	-0.77587		1.23845	1.12609	0.842139	1.31661	0.960183	0.584036
YHR152W	SPO12		0.30841	-0.31161	-0.55839	0.16265	0.0061234	-0.87674		1.23834	0.805742	0.67906	1.11934	1.00425	0.544597
YJL094C	KHA1		0.30769	-0.44126	-0.39189	-0.079063	0.60522	-0.83451		1.23772	0.736491	0.762131	0.946672	1.52121	0.560773
YMR268C	PRP24		0.30735	-0.16913	-0.46834	0.11106	0.06567	-0.45039		1.23743	0.889379	0.722796	1.08002	1.04657	0.731845
YBR207W	FTH1		0.30668	-0.0010809	-0.14878	0.33023	0.22886	-1.9255		1.23686	0.999251	0.902013	1.25721	1.17191	0.263249
YOL089C	HAL9		0.30668	-0.20324	-0.3806	-0.075417	-0.068598	-1.3616		1.23686	0.868598	0.768118	0.949068	0.953564	0.38915
YBR257W	POP4		0.30637	-0.35034	-0.23684	-0.062573	-0.12288	-1.0255		1.23659	0.784399	0.848602	0.957555	0.918353	0.49124
YPR122W	AXL1		0.30624	-0.13033	-0.10169	-0.023178	-0.11828	-0.42902		1.23648	0.913622	0.931941	0.984063	0.921285	0.742766
YGR113W	DAM1		0.30574	-0.13341	-0.3225	0.42395	-0.22362	-0.53307		1.23605	0.911674	0.799683	1.3416	0.856414	0.691083
YKR067W	GPT2		0.30516	0.15348	0.17252	0.23206	-0.3012	-1.0849		1.23556	1.11225	1.12703	1.17451	0.811577	0.471425
YJL082W	IML2		0.30466	0.39272	0.53622	0.85386	-0.013724	-0.62583		1.23513	1.31287	1.45017	1.80733	0.990532	0.648047
YBL029W			0.30436	0.14034	-0.051696	0.035273	-0.036382	-1.0103		1.23487	1.10216	0.964801	1.02475	0.975097	0.496443
YMR284W	YKU70		0.30399	-0.25283	-0.38299	0.53283	-0.81286	-0.79019		1.23455	0.839249	0.766847	1.44676	0.569252	0.578268
YPR175W	DPB2		0.30378	-0.036643	-0.051145	0.19045	0.13839	-0.72368		1.23437	0.974921	0.96517	1.14112	1.10068	0.605551
YDR028C	REG1		0.30344	0.084325	-0.17327	0.12065	-0.099434	-0.86516		1.23408	1.06019	0.88683	1.08722	0.933399	0.548986
YOR037W	CYC2		0.30343	0.28343	-0.28673	-0.030525	-0.086848	-0.70487		1.23407	1.21709	0.819758	0.979064	0.941578	0.613498
YEL016C	NPP2		0.30338	-0.1794	-0.28992	0.071645	0.077103	-0.72292		1.23403	0.88307	0.817947	1.05091	1.0549	0.60587
YDL176W			0.30336	0.2526	-0.26677	0.29223	-0.26119	-0.96786		1.23402	1.19135	0.831178	1.22453	0.834399	0.511264
YPR138C	MEP3		0.30297	0.37419	-0.16858	0.4778	0.43044	0.18289		1.23368	1.29611	0.889718	1.39262	1.34764	1.13516
YMR095C	SNO1		0.30292	0.36292	0.32525	-0.76688	-0.47197	0.10467		1.23364	1.28603	1.25288	0.587687	0.720979	1.07525
YHL026C			0.30218	-0.83321	-0.46178	-0.55669	0.82178	-0.50246		1.23301	0.561279	0.72609	0.67986	1.76759	0.705902
YGR204C-A			0.30094	0.12403	0.26445	-0.39322	-0.28732	1.0576		1.23195	1.08977	1.20118	0.761428	0.819423	2.08147
YDR393W	SHE9		0.3009	-0.036527	-0.32528	0.041286	-0.14467	-0.7423		1.23191	0.974999	0.798143	1.02903	0.904586	0.597786
YLR426W	TDA5		0.29996	-0.041688	0.15699	-0.03574	1.8015	-0.84658		1.23111	0.971518	1.11496	0.975531	3.48582	0.556101
YLR005W	SSL1		0.29965	-0.013611	-0.52533	-0.062279	-0.22654	-0.96285		1.23085	0.99061	0.6948	0.95775	0.854682	0.513042
YBR065C	ECM2		0.29963	0.005327	-0.14061	0.11667	0.39719	-0.67621		1.23083	1.0037	0.907136	1.08423	1.31694	0.625807
YER151C	UBP3		0.29946	0.20147	-0.39287	-0.068587	0.14128	-0.49456		1.23068	1.14987	0.761613	0.953571	1.10288	0.709778
YKL052C	ASK1		0.29853	-0.47099	-0.25805	-0.20473	0.23103	-0.67716		1.22989	0.721469	0.836217	0.867701	1.17367	0.625395
YOL164W	BDS1		0.29826	-0.52966	-0.25979	-0.11598	-0.29068	-1.0508		1.22966	0.692718	0.835209	0.922755	0.817517	0.4827
YAL027W	SAW1		0.2979	0.38204	-0.17179	0.23831	0.60377	-0.80041		1.22935	1.30318	0.887741	1.17961	1.51968	0.574186
YJL129C	TRK1		0.29779	-0.26184	-0.023054	-0.13582	0.065024	-0.82906		1.22926	0.834024	0.984147	0.910152	1.0461	0.562896
YOR075W	UFE1		0.29726	0.036436	-0.29289	0.25058	-0.21721	-0.70901		1.22881	1.02558	0.816265	1.18969	0.860227	0.61174
YGL037C	PNC1		0.29689	-0.11429	0.40958	-0.14826	-0.025567	-0.30646		1.22849	0.923837	1.3283	0.902338	0.982434	0.808623
YNL161W	CBK1		0.2968	0.20991	0.20953	0.30431	-0.11456	-0.77331		1.22842	1.15662	1.15631	1.23483	0.923664	0.585074
YNL159C	ASI2		0.29674	-0.19857	-0.31199	-0.055421	0.13213	-0.46417		1.22837	0.871414	0.80553	0.962314	1.09591	0.724888
YPL022W	RAD1		0.2967	0.16274	-0.15763	0.45255	-0.016672	-0.61357		1.22833	1.11941	0.896497	1.36846	0.98851	0.653577
YOR017W	PET127		0.2965	0.06048	-0.48334	0.18867	0.00085858	-0.62981		1.22816	1.04281	0.71532	1.13971	1.0006	0.646262
[truncated: 3,795 more rows]
